# 1 DETECTION OF AUTOLOGOUS BLOOD DOPING

2 Christer Malm,<sup>1,2</sup> Irene Granlund,<sup>2</sup> Michael Hall,<sup>2</sup> Pernilla Lindén,<sup>2</sup> Magnus Ericsson,<sup>3,4</sup> James I.  
3 Langridge,<sup>5</sup> Lee A. Gethings,<sup>5</sup> Chris Hughes,<sup>5</sup> and Nelson Khoo<sup>2</sup>

4 <sup>1</sup>Section of Sports Medicine, Department of Community Medicine and Rehabilitation, Umeå  
5 University, Umeå, Sweden. <sup>2</sup>Pro Test Diagnostics AB, Umeå, Sweden. <sup>4</sup>AFLD - Agence Française de  
6 Lutte contre le Dopage, Département des analyses, Châtenay-Malabry, France. <sup>5</sup>Department of  
7 Laboratory Medicine, Karolinska Institutet, Stockholm, Sweden. <sup>5</sup>Waters Corporation, Stamford  
8 Avenue, Altrincham Road, Wilmslow, UK.

## 9 ABSTRACT

10 **Objectives:** Autologous blood transfusion (ABT) enhances athlete's performance, is banned as doping  
11 by the World Anti-Doping Agency (WADA). Currently, there is no implemented detection method for  
12 ABT. Transfusion of one's own, long-term cryopreserved red blood cells (cryo-RBC) immediately  
13 increases circulating RBC count, hemoglobin mass, blood volume and oxygen carrying capacity,  
14 resulting in enhanced physical performance. Functional viability of cryo-RBC are maintained for  
15 decades, but storage lesions lead to removal of damaged RBC from circulation days after transfusion,  
16 with remaining circulating cryo-RBC displaying normal half-life. **Methods:** The cytosolic RBC  
17 peptidome from 22 human subjects (12 men and 10 women) was analyzed by UHPLC-MS/MS before  
18 and after ABT with cryo-RBC. As a control group and for investigation of confounders, 14 elite  
19 athletes and 5 recreational subjects were sampled multiple times, also at high altitude. **Results:** Here  
20 we report alteration in the cytosolic peptidome of circulating RBC weeks after ABT, discriminating  
21 doped from non-doped human subjects. A valid discriminating multivariate model (OPLS-DA) based  
22 on <200 peptides was accomplished ( $R^2/Q^2 = 0.88/0.59$ , P CV-ANOVA < 0.0001, ROC AUC = 0.97).  
23 Models did not show bias for sex, high altitude or elite endurance training and racing. **Conclusion:**  
24 Identified peptides with low intra- and inter-individual variation, and high multivariate model weight  
25 and probability scores, create a direct method for the detection of autologous blood doping.

26 Key words: endurance, performance, doping, proteomics

27 **Correspondence to:** Christer Malm [christer.malm@umu.se](mailto:christer.malm@umu.se)

28 Word count: 3286

## 29 INTRODUCTION

30 Autologous blood transfusion (ABT) enhances the athlete's performance,<sup>1</sup> and is viewed as doping,  
31 thus banned by the World Anti-Doping Agency (WADA); but with no implemented direct detection  
32 method,<sup>2</sup> it remains difficult to survey by sporting authorities. Because cold-stored (+1° to +4°C) blood  
33 is viable for a maximum of 42 days,<sup>3</sup> during which time the athlete's physical performance is  
34 compromised from blood donation,<sup>4,5</sup> and erythropoietin is readily detected,<sup>6</sup> the blood doping method  
35 of choice for cheating athletes is transfusion of one's own, long-term cryopreserved red blood cells  
36 (cryo-RBC). Upon transfusion, increases are immediately observed in circulating RBC count,  
37 hemoglobin mass,<sup>7</sup> blood volume and oxygen carrying capacity,<sup>8</sup> resulting in enhanced physical  
38 performance.<sup>1, 9, 10</sup> Cryo-RBC in storage maintain their function for more than a decade,<sup>11, 12</sup> but  
39 display storage lesions altering physical properties<sup>13, 14</sup> of both cytosolic<sup>15</sup> and membrane<sup>16</sup> proteins,  
40 leading to an expedited removal of damaged cryo-RBC from circulation 6 h to 48 h after transfusion.<sup>17,</sup>  
41 <sup>18</sup> The remaining circulating cryo-RBC display normal half-life<sup>19</sup> despite observable altered metabolic  
42 profiles<sup>20</sup> and irreversible cytosolic protein alterations, derived from the process of freezing and  
43 thawing.<sup>21</sup>

44 Today, indirect detection of ABT exist using the hematological module of the Athletes Biological  
45 Passport (ABP). The ABP uses longitudinal monitoring of standard hematological parameters to  
46 identify possible blood manipulations,<sup>22</sup> and can be considered less effective than anticipated in  
47 detecting ABT.<sup>23, 24</sup> Also, the ABP is affected by exercise<sup>25</sup> as well as increased fluid intake.<sup>26</sup>  
48 Moreover, several tests claim to detect ABT via: immunological reactions,<sup>27</sup> hematological variables,<sup>28</sup>  
49 phthalate/metabolites<sup>29</sup> and CO rebreathing<sup>30, 31</sup>, but no test is implemented for doping detection.

50 A direct and valid detection method for ABT remains elusive and unavailable,<sup>1, 32, 33</sup> but must include  
51 intracellular biomarkers, as all cell-surface alterations, including storage-induced,<sup>34</sup> initiate rapid  
52 removal of cryo-RBC from circulation by spleen macrophages,<sup>18</sup> thus circumventing the effectiveness  
53 of such markers for detection of ABT.

54 Proteomic and bioinformatic methodologies allows detection of sample differences in minutiae across  
55 subjects and chronology. We proposed that screening the cytosolic fraction of circulating RBC  
56 (RBCc) sampled before and after cryo-RBC transfusion, will provide markers specific to ABT.  
57 Subsequently, applying liquid chromatography tandem mass spectrometry (LC-MS/MS) analysis will  
58 generate biomarkers (proteins and/or peptides), differentiating the two states of pre- and post-  
59 transfusion, defining Clean and Doped samples, respectively. In addition, identified biomarkers will be  
60 curated to remove those markers biased for sex, exercise, hypoxia and high-altitude exposure.

## 61 METHOD (APPENDIX 10)

### 62 SUBJECTS

63 Autologous blood transfusion of eight men (age 29; 24-36 years [mean; min-max]) and seven women  
64 (age 27; 23-38 years) with peak oxygen consumption ( $VO_{2peak}$ ); Men (4.3; 3.2-5.0 L·min<sup>-1</sup>/53; 33-59  
65 mL·min<sup>-1</sup>·kg<sup>-1</sup>) and women (3.0; 2.4-3.6 L·min<sup>-1</sup>/48; 45-56 mL·min<sup>-1</sup>·kg<sup>-1</sup>) with five recreational  
66 Control subjects sampled in parallel (Appendix 2, 3 & 9). Fourteen international level elite endurance  
67 athletes investigated confounders by resting blood samples at: Sea Level (<80 m), High Altitude  
68 Training (>1500 m), Hypoxic Tents (>10 h/day, 14 days, 3-4000 m) and in the Hypoxia group up to  
69 28 days after a multisport race (700 km in 4.5 days reaching altitudes up to 4500 m, Appendix 2, 3 &  
70 9).

#### 71 TRANSFUSION

72 Women donated one (450 mL) and men two (900 mL) units of whole blood as s described in detail  
73 previously<sup>1,18</sup>. Whole blood was collected and glycerolized RBC stored at -80°C until transfusion.

#### 74 SAMPLING

75 In total, participants (21 men and 15 women, Appendix 2, 3 & 9) gave 307 venous blood samples,  
76 where 85 were in a Doped state after cryo-RBC transfusion, 173 in a Clean state and 49 samples taken  
77 directly from the Blood Donation Bag (timeline for Transfusion indicated in Figure 1). Some samples  
78 were used multiple times (noted as Batch I, II and III in Tables and Appendices), resulting in 392 LC-  
79 MS/MS sample injections (Appendix 2, 3 & 9).

#### 80 PREPARATION

81 Erythrocytes were lysed, the cytosol isolated and hemoglobin removed before determination of protein  
82 concentration. Pre-digest internal peptide standard was added before trypsin digestion. Clean-up of  
83 trypsin digest samples was performed by C18 and dried samples were stored at -80°C.

#### 84 NANO-UPLC-MS/MS ANALYSIS

85 Internal retention time standards, pre-LC internal standard and TFA were added before injection using  
86 a nanoACQUITY UltraPerformance UPLC™ (Waters). Separated peptides were analyzed using a  
87 Synapt G2™ or G2Si™ (Waters). Initial data evaluation used the MassLynx™ software (Waters).

#### 88 DATA PROCESSING AND ANALYSIS

89 Raw data processing, alignment, peptide identification, quantification (relative abundance) and  
90 comparative analysis were performed using Progenesis QI for Proteomics (Waters), Protein Lynx  
91 Global Server (Waters) and the open-source Skyline (<https://skyline.ms>). For peptide identification a  
92 curated human proteome database (Swiss-Prot) was used, acquired from Uniprot ([www.uniprot.org](http://www.uniprot.org)).

#### 93 STATISTICS

94 Mixed Model using Restricted Maximum Likelihood (REML) and multivariate analysis (MVA),<sup>1</sup> with  
95 Principal Component Analysis (PCA), Orthogonal Projections of Latent Structures (OPLS)<sup>35</sup>, and its

96 discriminant analysis OPLS-DA<sup>36</sup> were applied. Samples from blood donation (Clean) and after  
97 transfusion (Doped), High Altitude Training, Hypoxic Tents and Elite Endurance Athletes created  
98 MVA models (Appendix 5 & 9). Regression ( $R^2$ ) and prediction ( $Q^2$ ) were investigated, with valid  $R^2$   
99 and  $Q^2$  set to  $> 0.60$ ,<sup>35,37,38</sup> in three datasets: Training (Men), Testing (Women) and Validation (Men  
100 and Women) for Screening, Selection and Validation of Biomarkers (Appendix 5 & 9).

#### 101 CONFOUNDERS

102 Data from two LC-MS/MS analyses which differed to the biomarker screening dataset (Appendix 6),  
103 were used to create four OPLS-DA models investigating confounders. Appendix 7: 1) If peptides  
104 separating fresh and cryo-stored RBCc could separate Clean from Doped subject 2) Bias for Elite  
105 Endurance training and 3) Summary model (four Y -variables) of Clean, Doped, Elite Athletes and  
106 High-Altitude Training. Appendix 8: Bias for High Altitude Training and Hypoxic Tents.

#### 107 PATIENT AND PUBLIC INVOLVEMENT STATEMENT

108 Participants in the study were recruited locally. Each participant was given continuous feedback.  
109 Lectures informed staff, participants and colleagues of the study objectives.

#### 110 ETHICAL CONSIDERATIONS

111 The Ethics Board for Northern Sweden approved the study (DNr: Ö1-2009, 08-196M, 2011-408-  
112 32M), and transfusions performed in a hospital clinical. Risks reviewed in Appendix 1. The study was  
113 conducted in accordance with the WMA Declaration of Helsinki 2013. Data is encrypted and stored on  
114 security protected servers.

#### 115 RESULTS (EXTENSIVE MODELS IN APPENDIX 5 & 9).

116 Normal distribution of samples is visualized in a PCA model for Hematological (Figure 1A) and  
117 Proteomic (Figure 1B) data.

#### 118 HEMATOLOGY

119 Autologous blood transfusion changed hematological variables (Figure 1, Table 3, Appendix 3 and 4),  
120 but with large individual variations, making regression analysis and prediction of samples to Clean  
121 (Before blood donation) or Doped (after transfusion of cryo-RBC) unreliable (Figure 2 and 3,  
122 Appendix 3 and 4). The visualized OPLS-DA analysis (Figure 3) indicate models with low  $R^2$  ( $<0.6$ )  
123 and  $Q^2$  ( $<0.2$ ) in the Summary of Fit plot, and sensitivity and specificity displayed in the ROC curve,  
124 where AUC for Men = 0.97 and Women = 0.79. Selection for prediction by VIP Pred indicate  
125 different variables of importance for men and women.

126 **Interpretation:** Hematological data can generate weak regression models with low predictive power,  
127 even when used in combinations.

128

FIGURE 1 HERE - Hematology

129

130

FIGURE 2 HERE – PCA models

131 **PROTEOMICS**

132 Multivariate data analysis (MVA) of quantified and identified peptides from circulating RBC cytosol  
133 created significant and cross-validated PCA and OPLS-DA models for regression and prediction of  
134 analyzed samples to Clean and Doped groups (Figures 3, Appendix 6). Separation of Clean and Doped  
135 samples by OPLS-DA analysis resulted in  $R^2$  and  $Q^2 > 0.9$  for men, and  $R^2 > 0.6$  and  $Q^2 < 0.2$  for women,  
136 displayed in the Summary of Fit plot. Sensitivity and specificity are displayed in the ROC curve,  
137 where AUC for Men = 1.00 and Women = 0.68. Selection for prediction by VIP Pred indicate  
138 different variables of importance for men and women.

139 Further results when screening for biomarkers are displayed in Figure 4, where data is divided into  
140 three sets; Training (Men), Testing (Women) and Validation (Men and Women). Because the RBC  
141 cytosolic fraction (Hb removed) of RBC (RBCc) had different peptidomic profile in men and women,  
142  $R^2(\text{cum}) = 0.99/Q^2 = 0.92$ ;  $P < 0.0001$ , different biomarkers in each sex may be assumed. Models  
143 excluding sex-separating peptides were also investigated (Appendix 6).

144 **Training (Men)** the model pared down data to the 200 most important peptides, separating Clean  
145 from Doped both in PCA and OPLS-DA analysis, with high  $R^2/Q^2$  of 0.90/0.79, cross-validated by  
146 100 permutations and predicting 28/28 samples to the correct class. AUC = 0.96.

147 **Testing (Women)** of the model as accomplished by applying the 200 peptides from the Training  
148 model on a cohort of women, resulted in  $R^2/Q^2$  of 1.00/0.52, cross-validated by 100 permutations and  
149 predicting 28/28 samples to the correct class. AUC = 0.92.

150 **Validation (Men and Women)** of selected peptides for prediction of Doping used both male and  
151 female subjects in combination, starting with the 200 peptides from men and removing peptides until  
152 an optimized model was achieved, containing 50 peptides, reaching,  $R^2/Q^2$  of 0.88/0.59, cross-  
153 validated by 100 permutations and predicting 56/56 samples to the correct class. AUC = 0.97.

154 Ranking peptides by OPLS-DA loading scores suggests potential candidates for development of  
155 diagnostic tools applicable for the detection of autologous blood doping in humans (Figure 5).  
156 Merging hematological and peptidomic signature variables, demonstrate a lower loading impact of  
157 hematological variables, compared to peptides (Figure 5) in MVA modeling, supporting the previously  
158 demonstrated<sup>1</sup> lack of predictive power using hematology (Figure 1, 2 and 3).

159

FIGURE 3 HERE – OPLS-DA models

160

161 FIGURE 4 HERE – Training/Testing/Validation

162

163 FIGURE 5 HERE – Loading plot

164 **CONFOUNDERS**

165 *In vitro* peptides quantified and identified from analysis of the cytosolic fraction of RBCs, harvested  
166 from transfusion bags before and after cryo-preservation, created significant and cross-validated  
167 OPLS-DA models for the two conditions (Bags, Figure 6). *In vitro* identified peptides did not create  
168 significant and cross-validated OPLS-DA models for venous blood samples taken before and after  
169 cryo-RBC transfusion (i.e. autologous blood doping, Blood Sample, Figure 6). *In vivo* peptides  
170 quantified and identified from analysis of RBCc taken by venous blood sampling in humans before  
171 and after cryo-RBC transfusion, created significant and cross-validated OPLS-DA models (Appendix  
172 9/Table 6/Model 19). *In vivo* Doped peptides (top 200 from the OPLS-DA coefficients for Doped) also  
173 separated venous blood samples taken from individuals (Elite Athletes) trained at High Altitude, living  
174 in Hypoxic Tents and Elite Athlete sampled at sea level (Figure 6, Appendix 9/Table 6). In the  
175 Summary plot (Figure 6), samples from Doped do not overlap with other investigated cohorts.

176 FIGURE 6 HERE – Confounders

177 **Interpretation:** Proteomic data can generate strong regression models with high predictive power,  
178 both for Men and Women, with no impact (bias) from investigated confounders.

179 **DISCUSSION**

180 Autologous blood doping with cryo-RBC is detected in human subjects by unlabeled, quantitative  
181 nano-UPLC-MS/MS. Comparing peptide patterns from RBCc separated Clean from Doped  
182 individuals using the multivariate discriminating method OPLS-DA ( $R^2 > 0.90$ ,  $Q^2 > 0.90$ ,  $p < 0.001$ ,  
183  $X < 200$ ). Cross-validated models did not show bias for sex, strenuous physical exercise, hypoxia  
184 exposure and high-altitude training in elite athletes. In comparison, hematological variables alone  
185 failed to generate significant OPLS-DA models when analyzed in parallel blood samples.  
186 Investigations were executed using prospective case-control, cohort and cross-sectional study designs.

187 **BIOMARKERS IN BIOLOGICAL MATRIXES**

188 Biomarkers for any diagnostics must be reliable, sensitive, specific, and discriminative.<sup>39, 40</sup> In  
189 addition, validation must determine predictability of unknown samples to correct state (i.e. Clean or  
190 Doped). For practical implementation in anti-doping efforts to keep sports clean, aspects such as

191 available sample matrices, Doping Control Laboratory (DCL) facilities, transport systems and cost are  
192 also important considerations.

193 Red blood cells are closed systems, unable to synthesis protein and with a life cycle of approximately  
194 120 days in adult humans.<sup>41</sup> Once set in circulation, RBC undergo an ageing processes, with changing  
195 plasma membrane and external structures,<sup>3,41</sup> making them susceptible to recognition and subsequent  
196 systemic removal by spleen macropahges.<sup>18, 42</sup> While homologous blood transfusion can be detected  
197 via surface antigens,<sup>3</sup> the only current method to detect autologous blood transfusion is via Hb mass by  
198 CO-rebreathing.<sup>43, 44</sup> The WADA research initiative states that there is no unequivocal detection  
199 method for autologous blood doping, as CO is toxic it has no relevance in anti-doping control of  
200 healthy athletes who would be reluctant to have a toxic agent imposed on them repeatedly. Autologous  
201 blood doping with cryo-RBC is the preferred choice of cheating athletes, as RBC in cold storage  
202 (+4°C) has a known clinical safety limit of 42 days after donation, necessitating repeated blood  
203 donation, and subsequent decreased performance,<sup>45</sup> during the preparation phase for competition as the  
204 red blood cell population are regenerated to compensate for the loss. Cryo-RBC on the other hand,  
205 may be stored for decades.<sup>12</sup>

206 Regardless of storage procedure, a fraction of all transfused RBCs is damaged and, just as aging RBC,  
207 removed from circulation not in 120 days but within 6 h to 48 h.<sup>19</sup> Consequently, RBC with intact cell  
208 surface proteins, and remaining in circulation 48 h after transfusion, may be viewed as circulating  
209 time-stamps, containing bioinformation useful in the detection of ABT.<sup>46, 47</sup> The cryo-induced  
210 formation of ice crystals, permanently damaging cytosolic RBC proteins,<sup>21</sup> serves as a probable, but  
211 not the only inducer of potential biomarkers – creating unique detectable peptide fragments after  
212 protein trypsinization. An additional advantage of using altered cytosolic biomarkers, compared to  
213 hematological variables, is that plasma volume changes will not influence analytical results.

214 The present series of studies follows a general procedure for biomarker discovery and validation,<sup>39, 40</sup>  
215 including establishing robust baseline values by repeated sample collection at rest in all investigated  
216 groups, transports and storage conditions and routine procedures in accredited, clinical laboratories.  
217 Current approaches with multiplexing orthogonal biomarkers into one assay increase robustness to  
218 confounders and inter-laboratory variations, while reducing analytical costs. The results are reliable,  
219 validated for several known possible confounders, have high specificity, sensitivity and discriminating  
220 power.<sup>39</sup>

#### 221 *TRUE POSITIVES AND NEGATIVES*

222 One unavoidable challenge when investigating ABT is the inclusion of true positives, vital for all  
223 statistical analysis and legal actions. As previously directly shown by us<sup>1</sup>, argued by others<sup>23</sup> and here  
224 again demonstrated (Figures 2 and 3) - hematological markers are indirect indicators of ABT, and will  
225 always be subject for interpretation (what are limits for normal intra-individual variation?) and

226 significant confounder (exercise, hydration, high altitude, diet, illness etc.) opening for cheating  
227 athletes to be legally dismissed from conviction. When investigating hematological intra- and inter-  
228 individual variations over time in Clean vs. Doped subjects, neither regression nor prediction models  
229 are reliable (Appendix 5). In the context of doping detection, median/range values from elite athletes<sup>22,</sup>  
230 <sup>31, 48</sup> (unknown status of doping) are not relevant for individual judgements, as mean/median values  
231 from true positively doped subjects<sup>1</sup> can also stay within 95% CI (Figure 2 & Appendix 5). Also, when  
232 using cold stored RBC, detection of ABT by hematological measurements has shown low specificity  
233 and sensitivity<sup>31, 49, 50</sup>. Hematological variables changed with investigated confounders, even when  
234 more advanced statistical approaches are applied (Figure 1).

235 The present use of clean elite athletes for comparison is not often possible when validating biomarkers  
236 for doping, as athletes cannot serve as subjects. Using cohorts of elite athletes from routine sampling  
237 as controls adds uncertainty to any model, as their true state of Clean or Doped cannot be known. Elite  
238 athletes participating in this study volunteered to live for extended periods of time in hypoxic tents,  
239 before training and competing at high altitude. Knowing they would be tested for blood doping, it is  
240 highly unlikely doped athletes are included, also confirmed by the OPLS-DA analysis.

#### 241 *WINDOW OF DETECTION*

242 Theoretically, transfusion of cryo-RBC can be detected for up to 120 days, if the youngest RBCs at  
243 time of donation could be identified after transfusion.<sup>19</sup> Limits of Quantification (LOQ) with the  
244 presented method is still not fully investigated, but a few samples (N=14) taken four and five weeks  
245 after transfusion (Batch I) are below critical limits (99%) when analyzed by Hotelling's  $T^2$  indicating  
246 that these samples are no different compared to samples taken one to three weeks after transfusion.  
247 Because cryo-induced peptide abundance diminish as RBCs are aged and removed, LOQ should be  
248 determined by target analysis methods. Determining LOQ will also be valuable for detection of micro-  
249 dosing with cryo-RBC, a practice likely to be used by cheating athletes to avoid detection.

#### 250 *ALTERNATIVE INTERPRETATIONS AND LIMITATIONS*

251 An alternative biomarker selection procedure for Clean vs. Doped models could be to exclude the  
252 most important (highest OPLS-DA coefficient scores) peptides separating RBCc from Men and  
253 Women taken at rest (Clean). This approach may potentially remove peptides important for detecting  
254 reinfusion of only one unit cryo-RBC. Creating OPLS-DA models that include 5000 peptides which  
255 are most relevant for separating of Men and Women, then selecting the 200 peptides with the highest  
256 coefficient score for Doped, creates models for Clean vs. Doped, still biased for sex in the regression  
257 models, but without predictive power: Men vs. Women  $R^2 = 0.45$  and  $Q^2 = -1.55$ , CV-ANOVA  $p$   
258  $=1.00$ . Data remaining after removing 5 000 peptides from the model of Men vs. Women, provides an  
259 OPLS-DA model for Clean vs. Doped using 200 peptides with  $R^2/Q^2 = 0.64/0.24$ , CV-ANOVA  $p <$   
260  $0.001$ . Removing 10 000 peptides gives  $R^2/Q^2 = 0.79/0.38$ , CV-ANOVA  $p < 0.001$ . As discussed,



261 approaching the biomarker selection via a Training set consisting of Men (reinfused with two units  
262 RBC) resulted in stronger regression and prediction models (Figure 4). Alternatively, the models for  
263 sex investigate cryo-RBC reinfusion of one vs. two units. Data from the present study design cannot  
264 distinguish these two options.

265 Regardless, with the presented list of peptides (Appendix 6 & 9) ABT can be detected in both men and  
266 women, reinfused with either one or two units cryo-RBC for at least two weeks after reinfusion.

## 267 CONCLUSION

- 268 • Doping with ABT is directly detected by cryo-induced alterations in cytosolic RBC peptides,  
269 with high sensitivity and specificity in both men and women.
- 270 • Elite endurance training at low and high altitude did not significantly affect peptides  
271 discriminating Clean from Doped samples.
- 272 • Presented peptides can be used for direct detection of autologous blood doping using standard  
273 equipment available in Doping Control Laboratories.

## 274 FUTURE RESEARCH

275 The potential of selected peptides for labeling and direct detection of autologous blood doping by  
276 target analysis should be explored, with independent prospective case-control trials and cross-sectional  
277 studies, including inter- and intra-laboratory analytical variability. Larger, both-sex cohorts of clean  
278 and doped subjects, elite athletes and different ethnic groups need to be sampled for investigation of  
279 sensitivity, specificity, false positive and likelihood ratios.

## 280 ACKNOWLEDGEMENTS

281 Outstanding contributions were given by: The staff at Sunderby Hospital, Luleå for hosting the first  
282 series of blood transfusions, under the medical responsibility of Staffan Wikström. The staff at  
283 Winternet, Boden for performing all exercise testing and blood sample collection, especially Anna  
284 Tano-Nordin and Eva Edholm. The staff at Björknäs Health Center, Boden under guidance of Lillian  
285 Falk for organizing the first round of blood donations. The staff at Huddinge Blood Central, where  
286 Eva Trollin and Linda Larsson were responsible for blood cryopreservation, and head of unit Hans  
287 Gulliksson kindly supported the project. Blood donation, cryopreservation and transfusion, as well as  
288 blood sampling, has also been executed by the Center for Stem Cell Apheresis and Management at  
289 Huddinge University Hospital, where Emma Watz, Beatrice Asperval Diedrich and Peter Matha  
290 managed the study. Ogonna Obudulu for consultation on multivariate statistics. Gunnar Wingsle for  
291 technical support with LC-MS/MS, Raik Wagner and Johan Jakobsson for proof-reading and  
292 improving the manuscript. All participating subjects for enduring blood loss, exhaustive exercise and  
293 numerous trips to the labs.

294 **CONTRIBUTORS**

295 CM conceived the idea, received funding, developed the methodology and clinical study, performed  
296 statistical analysis and was lead writer. IG, MH, PL developed the methodology, prepared samples,  
297 executed LC-MS/MS analysis and data cleanup. JL, LG, CH developed the method and executed LC-  
298 MS/MS analysis. NK developed the methodology, designed experiments and improved data cleanup.  
299 All author participated in writing and editing the final manuscript.

300 **FUNDING**

301 This work was funded by WADA: R07A1CM, 08C06CM and T13M04CM, VINNOVA; 2009-00462,  
302 2013-05410, 2015-05299, 2018-0188, Centrum för Idrottsforskning; 2008 88/08 and Umeå Biotech  
303 Incubator. The funders had no role in study design, data collection and analysis, decision to publish, or  
304 preparation of the manuscript.

305 **REFERENCES**

- 306 1. Malm CB, Khoo NS, Granlund I, et al. Autologous Doping with Cryopreserved Red Blood Cells -  
307 Effects on Physical Performance and Detection by Multivariate Statistics. *PLoS One*  
308 2016;11(6):e0156157. doi: 10.1371/journal.pone.0156157
- 309 2. WADA. Blood doping. <https://www.wada-ama.org/en/questions-answers/blood-doping#item-596>,  
310 2019.
- 311 3. Almizraq R, Tchir JD, Holovati JL, et al. Storage of red blood cells affects membrane composition,  
312 microvesiculation, and in vitro quality. *Transfusion (Paris)* 2013;53(10):2258-67. doi:  
313 10.1111/trf.12080 [published Online First: 2013/01/17]
- 314 4. Berglund B, Birgegard G, Wide L, et al. Effects of blood transfusions on some hematological  
315 variables in endurance athletes. *Med Sci Sports Exerc* 1989;21(6):637-42. [published Online First:  
316 1989/12/01]
- 317 5. Ekblom B, Goldbarg AN, Gullbring B. Response to exercise after blood loss and reinfusion. *J Appl*  
318 *Physiol* 1972;33(2):175-80.
- 319 6. Lasne F, Martin L, Crepin N, et al. Detection of isoelectric profiles of erythropoietin in urine:  
320 differentiation of natural and administered recombinant hormones. *Anal Biochem* 2002;311(2):119-26.  
321 doi: S0003269702004074 [pii] [published Online First: 2002/12/10]
- 322 7. Ashenden M, Morkeberg J. Net haemoglobin increase from reinfusion of refrigerated vs. frozen red  
323 blood cells after autologous blood transfusions. *Vox Sang* 2011;101(4):320-6. doi: 10.1111/j.1423-  
324 0410.2011.01493.x [published Online First: 2011/05/04]

- 325 8. Boning D, Maassen N, Pries A. The Hematocrit Paradox - How Does Blood Doping Really Work?  
326 *Int J Sports Med* 2011;32(4):242-46. doi: 10.1055/s-0030-1255063
- 327 9. Schmidt W, Prommer N. Impact of alterations in total hemoglobin mass on VO<sub>2</sub>max. *Exerc Sport*  
328 *Sci Rev* 2010;38(2):68-75. doi: 10.1097/JES.0b013e3181d4957a [published Online First: 2010/03/26]
- 329 10. Lundby C, Montero D, Joyner M. Biology of VO<sub>2</sub> max: looking under the physiology lamp. *Acta*  
330 *Physiol (Oxf)* 2017;220(2):218-28. doi: 10.1111/apha.12827 [published Online First: 2016/11/27]
- 331 11. Valeri CR, Ragno G, Pivacek LE, et al. An experiment with glycerol-frozen red blood cells stored  
332 at -80 degrees C for up to 37 years. *Vox Sang* 2000;79(3):168-74. doi: 10.1159/000031236 [published  
333 Online First: 2000/12/09]
- 334 12. MacLare G. Request for the extended storage of frozen red cells beyond 10 years to be considered  
335 for inclusion within UK Guidelines. 2016
- 336 13. Bizjak DA, Jungen P, Bloch W, et al. Cryopreservation of red blood cells: Effect on rheologic  
337 properties and associated metabolic and nitric oxide related parameters. *Cryobiology* 2018;84:59-68.  
338 doi: 10.1016/j.cryobiol.2018.08.001 [published Online First: 2018/08/07]
- 339 14. Pallotta V, D'Amici GM, D'Alessandro A, et al. Red blood cell processing for cryopreservation:  
340 from fresh blood to deglycerolization. *Blood Cells Mol Dis* 2012;48(4):226-32. doi:  
341 10.1016/j.bcmd.2012.02.004 [published Online First: 2012/03/20]
- 342 15. Walpurgis K, Kohler M, Thomas A, et al. Storage-induced changes of the cytosolic red blood cell  
343 proteome analyzed by 2D DIGE and high-resolution/high-accuracy MS. *Proteomics*  
344 2012;12(21):3263-72. doi: 10.1002/pmic.201200280
- 345 16. Holovati JL, Wong KA, Webster JM, et al. The effects of cryopreservation on red blood cell  
346 microvesiculation, phosphatidylserine externalization, and CD47 expression. *Transfusion (Paris)*  
347 2008;48(8):1658-68. doi: 10.1111/j.1537-2995.2008.01735.x [published Online First: 2008/05/17]
- 348 17. Hult A, Malm C, Oldenborg PA. Transfusion of cryopreserved human red blood cells into healthy  
349 humans is associated with rapid extravascular hemolysis without a proinflammatory cytokine  
350 response. *Transfusion (Paris)* 2013;53(1):28-33. doi: 10.1111/j.1537-2995.2012.03710.x
- 351 18. Hult A, Fredrik T, Christer M, et al. Phagocytosis of liquid-stored red blood cells in vitro requires  
352 serum and macrophage scavenger receptors. *Submitted* 2015
- 353 19. Mock DM, Matthews NI, Zhu S, et al. Red blood cell (RBC) survival determined in humans using  
354 RBCs labeled at multiple biotin densities. *Transfusion (Paris)* 2011;51(5):1047-57. doi:  
355 10.1111/j.1537-2995.2010.02926.x

- 356 20. D'Alessandro A, Gray AD, Szczepiorkowski ZM, et al. Red blood cell metabolic responses to  
357 refrigerated storage, rejuvenation, and frozen storage. *Transfusion (Paris)* 2017;57(4):1019-30. doi:  
358 10.1111/trf.14034 [published Online First: 2017/03/16]
- 359 21. Poisson JS, Acker JP, Briard JG, et al. Modulating Intracellular Ice Growth with Cell-Permeating  
360 Small-Molecule Ice Recrystallization Inhibitors. *Langmuir* 2019;35(23):7452-58. doi:  
361 10.1021/acs.langmuir.8b02126 [published Online First: 2018/08/19]
- 362 22. Berglund B, Ekblom B, Ekblom E, et al. The Swedish Blood Pass project. *Scand J Med Sci Sports*  
363 2007;17(3):292-7.
- 364 23. Pialoux V, Mounier R, Brugniaux JV. Hemoglobin and hematocrit are not such good candidates to  
365 detect autologous blood doping. *Int J Hematol* 2009;89(5):714-5. doi: 10.1007/s12185-009-0330-5  
366 [published Online First: 2009/05/21]
- 367 24. Thevis M, Kohler M, Schanzer W. New drugs and methods of doping and manipulation. *Drug*  
368 *discovery today* 2008;13(1-2):59-66. doi: S1359-6446(07)00492-8 [pii]  
369 10.1016/j.drudis.2007.11.003 [published Online First: 2008/01/15]
- 370 25. Morkeberg JS, Belhage B, Damsgaard R. Changes in blood values in elite cyclist. *Int J Sports Med*  
371 2009;30(2):130-8. doi: 10.1055/s-2008-1038842 [published Online First: 2008/09/06]
- 372 26. Bejder J, Hoffmann MF, Ashenden M, et al. Acute hyperhydration reduces athlete biological  
373 passport OFF-hr score. *Scand J Med Sci Sports* 2015 doi: 10.1111/sms.12438
- 374 27. Pottgiesser T, Schumacher YO, Funke H, et al. Gene expression in the detection of autologous  
375 blood transfusion in sports--a pilot study. *Vox Sang* 2009;96(4):333-6. doi: VOX1169 [pii]  
376 10.1111/j.1423-0410.2009.01169.x [published Online First: 2009/03/04]
- 377 28. Gore CJ, Parisotto R, Ashenden MJ, et al. Second-generation blood tests to detect erythropoietin  
378 abuse by athletes. *Haematologica* 2003;88(3):333-44. [published Online First: 2003/03/26]
- 379 29. Monfort N, Ventura R, Latorre A, et al. Urinary di-(2-ethylhexyl)phthalate metabolites in athletes  
380 as screening measure for illicit blood doping: a comparison study with patients receiving blood  
381 transfusion. *Transfusion (Paris)* 2009;50(1):145-9. doi: TRF2352 [pii]  
382 10.1111/j.1537-2995.2009.02352.x [published Online First: 2009/08/22]
- 383 30. Pottgiesser T, Umhau M, Ahlgrim C, et al. Hb mass measurement suitable to screen for illicit  
384 autologous blood transfusions. *Med Sci Sports Exerc* 2007;39(10):1748-56. doi:  
385 10.1249/mss.0b013e318123e8a6

- 386 00005768-200710000-00011 [pii] [published Online First: 2007/10/03]
- 387 31. Morkeberg J, Sharpe K, Belhage B, et al. Detecting autologous blood transfusions: a comparison  
388 of three passport approaches and four blood markers. *Scand J Med Sci Sports* 2011;21(2):235-43. doi:  
389 10.1111/j.1600-0838.2009.01033.x [published Online First: 2009/11/12]
- 390 32. Thevis M, Kuuranne T, Walpurgis K, et al. Annual banned-substance review: analytical  
391 approaches in human sports drug testing. *Drug Test Anal* 2016;8(1):7-29. doi: 10.1002/dta.1928
- 392 33. Fitch KD. Blood doping at the Olympic Games. *J Sport Med Phys Fit* 2017;57(11):1526-32. doi:  
393 10.23736/S0022-4707.17.06948-1
- 394 34. Al-Thani AM, Voss SC, Al-Menhali AS, et al. Whole Blood Storage in CPDA1 Blood Bags Alters  
395 Erythrocyte Membrane Proteome. *Oxid Med Cell Longev* 2018;2018:6375379. doi:  
396 10.1155/2018/6375379 [published Online First: 2018/12/12]
- 397 35. Bylesjo M, Eriksson D, Sjodin A, et al. Orthogonal projections to latent structures as a strategy for  
398 microarray data normalization. *BMC Bioinformatics* 2007;8:207. doi: 1471-2105-8-207 [pii]  
399 10.1186/1471-2105-8-207 [published Online First: 2007/06/20]
- 400 36. Pohjanen E, Thysell E, Jonsson P, et al. A multivariate screening strategy for investigating  
401 metabolic effects of strenuous physical exercise in human serum. *J Proteome Res* 2007;6(6):2113-20.  
402 doi: 10.1021/pr070007g [published Online First: 2007/04/13]
- 403 37. Wold S, Esbensen K, Geladi P. Principal Component Analysis. *Chemometrics and Intelligent*  
404 *Laboratory Systems* 1987;2:37-52.
- 405 38. Trygg J, Holmes E, Lundstedt T. Chemometrics in metabonomics. *J Proteome Res* 2007;6(2):469-  
406 79. doi: 10.1021/pr060594q [published Online First: 2007/02/03]
- 407 39. Aikin R, Baume N, Equey T, et al. Biomarkers of doping: uses, discovery and validation.  
408 *Bioanalysis* 2020 doi: 10.4155/bio-2020-0035 [published Online First: 2020/06/02]
- 409 40. Brun V, Couté Y, editors. *Proteomics for Biomarker Discovery: Methods and Protocols*.  
410 Université Grenoble Alpes, CEA, Inserm, BGE U1038GrenobleFrance: Human Press, 2019.
- 411 41. Bosman GJ. Survival of red blood cells after transfusion: processes and consequences. *Front*  
412 *Physiol* 2013;4:376. doi: 10.3389/fphys.2013.00376
- 413 42. Hult A. Towards a detailed understanding of the red blood cell storage lesion: and its  
414 consequences for in vivo survival following transfusion. Umeå Universiy, 2015.

- 415 43. Schmidt W, Prommer N. The optimised CO-rebreathing method: a new tool to determine total  
416 haemoglobin mass routinely. *Eur J Appl Physiol* 2005;95(5-6):486-95. doi: 10.1007/s00421-005-  
417 0050-3 [published Online First: 2005/10/14]
- 418 44. Siebenmann C, Keiser S, Robach P, et al. CORP: The assessment of total hemoglobin mass by  
419 carbon monoxide rebreathing. *J Appl Physiol* 2017;123(3):645-54. doi:  
420 10.1152/jappphysiol.00185.2017 [published Online First: 2017/07/01]
- 421 45. Celsing F, Nystrom J, Pihlstedt P, et al. Effect of long-term anemia and retransfusion on central  
422 circulation during exercise. *J Appl Physiol (1985)* 1986;61(4):1358-62.
- 423 46. Karsten E, Breen E, Herbert BR. Red blood cells are dynamic reservoirs of cytokines. *Sci Rep*  
424 2018;8(1):3101. doi: 10.1038/s41598-018-21387-w
- 425 47. Carvalho AS, Rodriguez MS, Matthiesen R. Red Blood Cells in Clinical Proteomics. *Methods Mol*  
426 *Biol* 2017;1619:173-81. doi: 10.1007/978-1-4939-7057-5\_13
- 427 48. Malcovati L, Pascutto C, Cazzola M. Hematologic passport for athletes competing in endurance  
428 sports: a feasibility study. *Haematologica* 2003;88(5):570-81.
- 429 49. Pottgiesser T, Echteler T, Sottas PE, et al. Hemoglobin mass and biological passport for the  
430 detection of autologous blood doping. *Med Sci Sports Exerc* 2012;44(5):835-43. doi:  
431 10.1249/MSS.0b013e31823bcfb6
- 432 50. Sallet P, Brunet-Guedj E, Mornex R, et al. Study of a new indirect method based on absolute  
433 norms of variation to detect autologous blood transfusion. *Int J Hematol* 2008;88(4):362-8. doi:  
434 10.1007/s12185-008-0182-4 [published Online First: 2008/10/24]
- 435

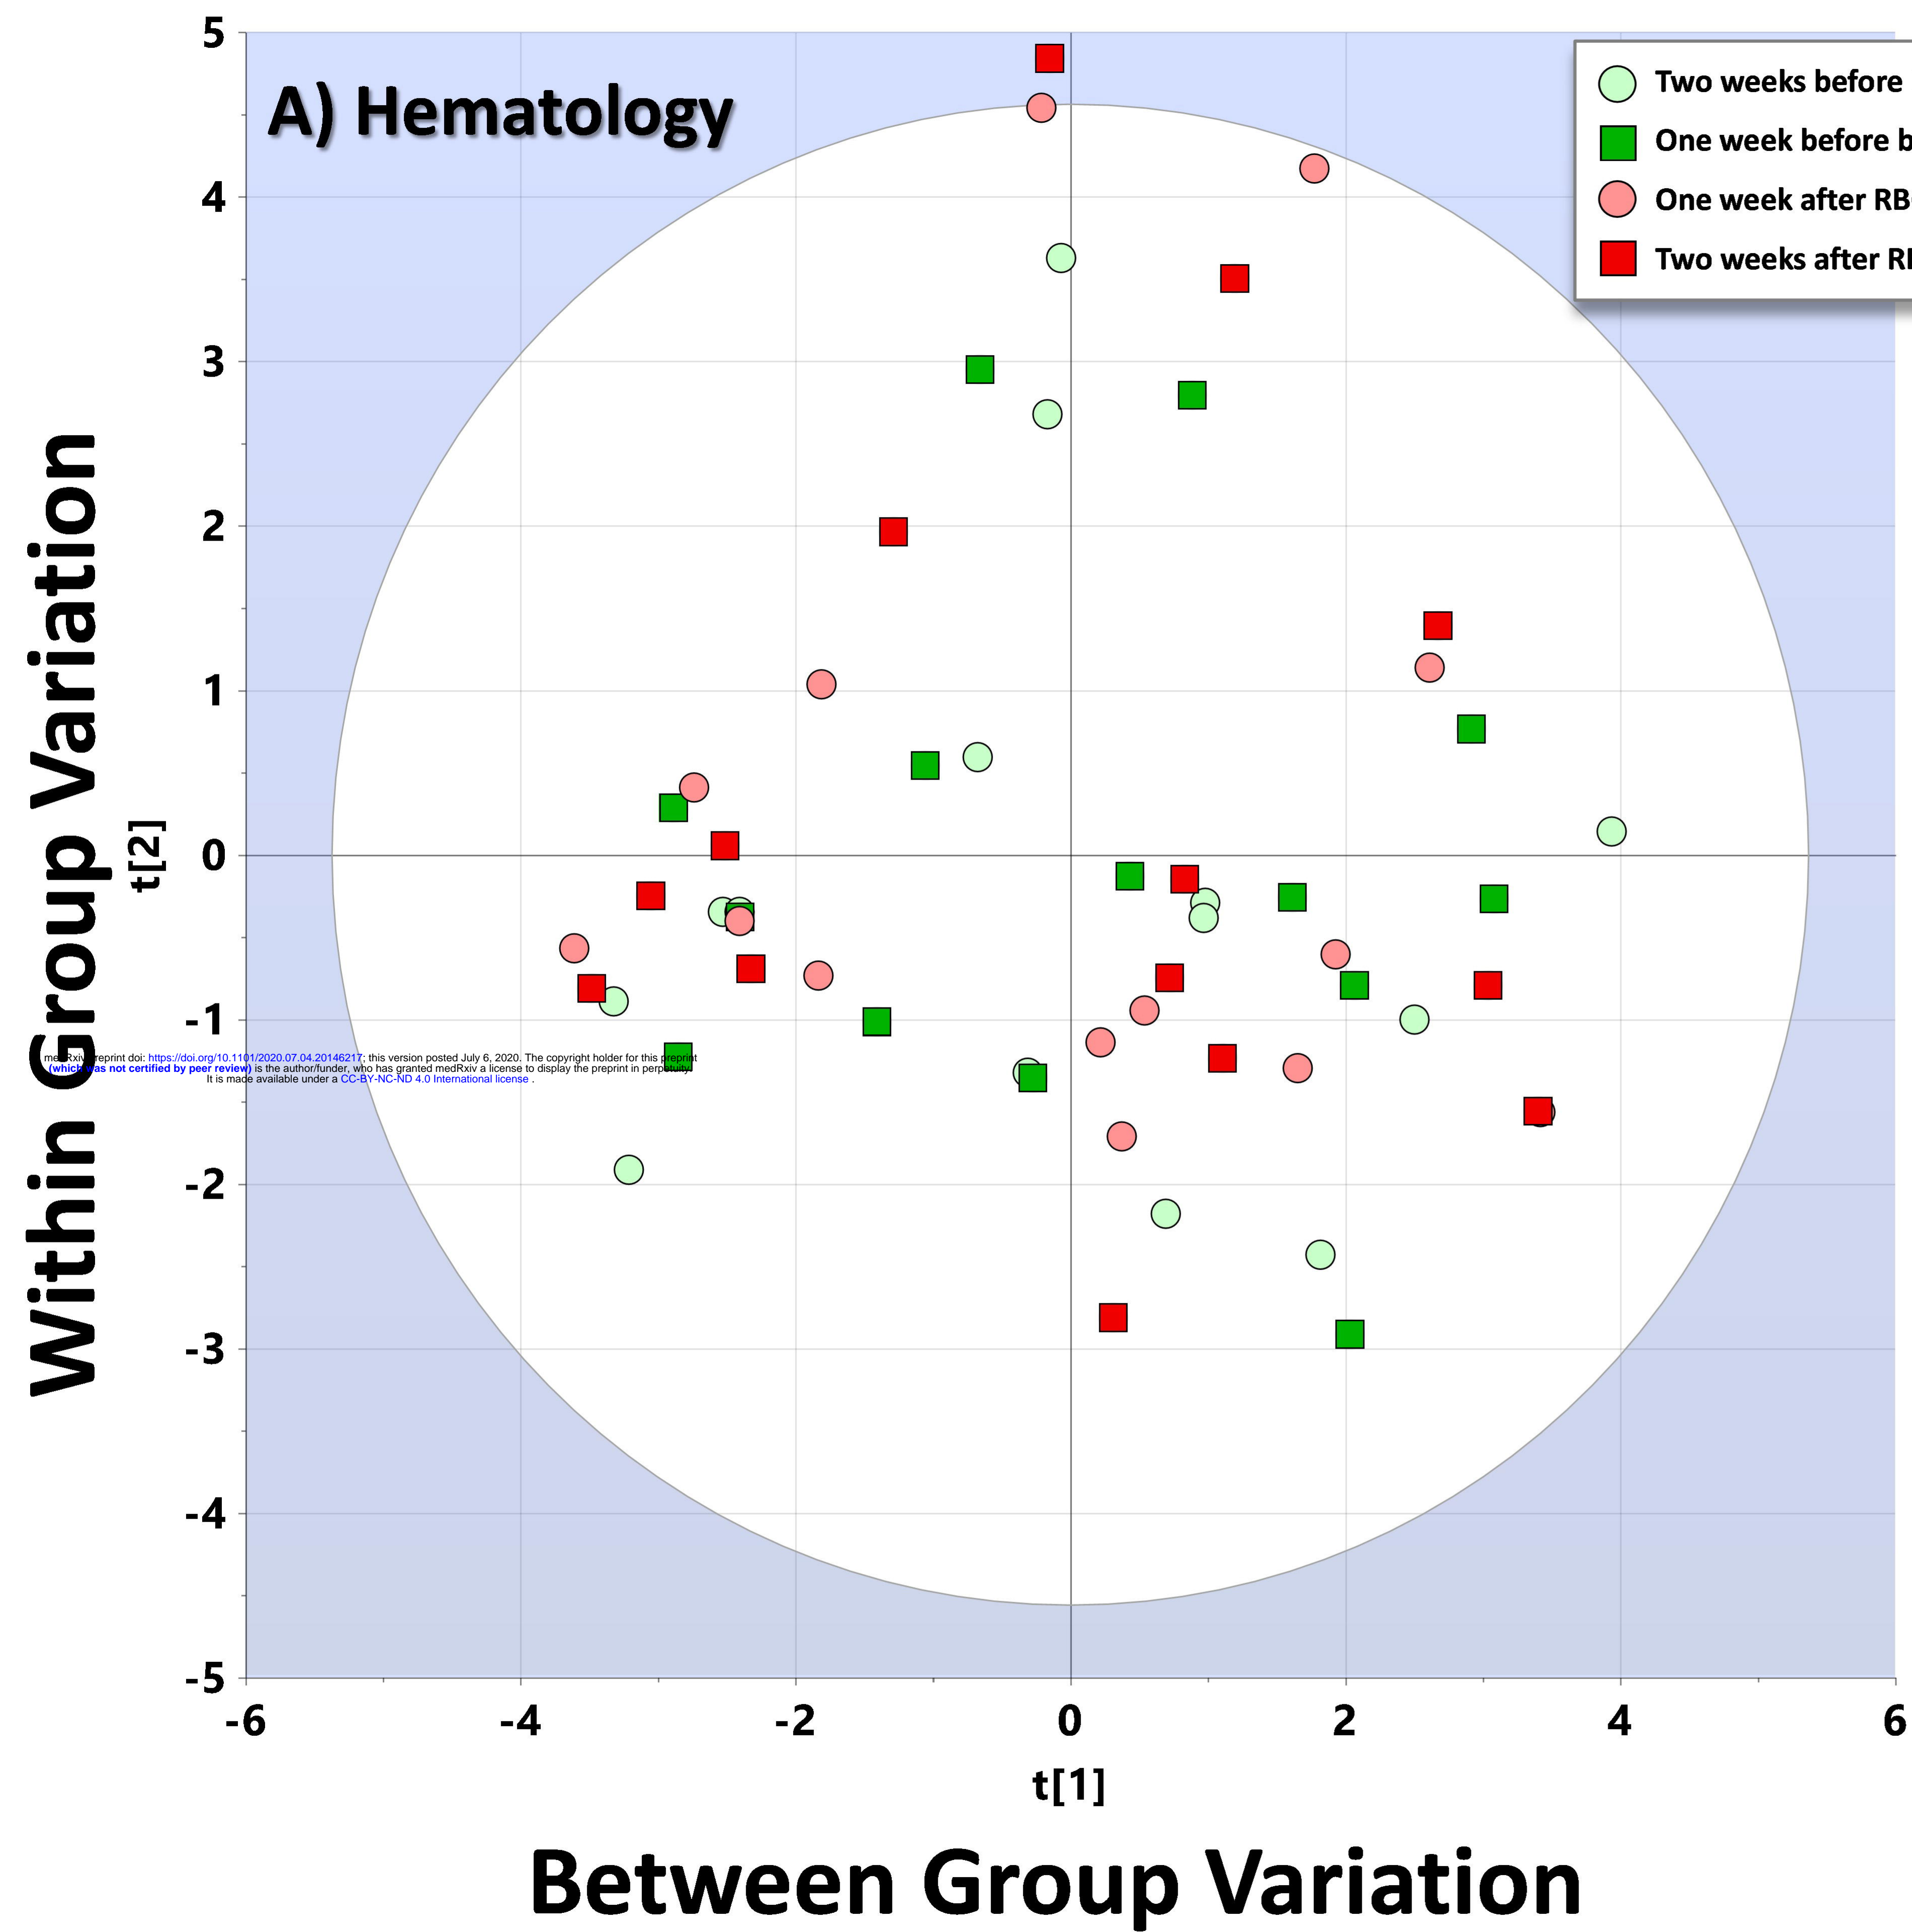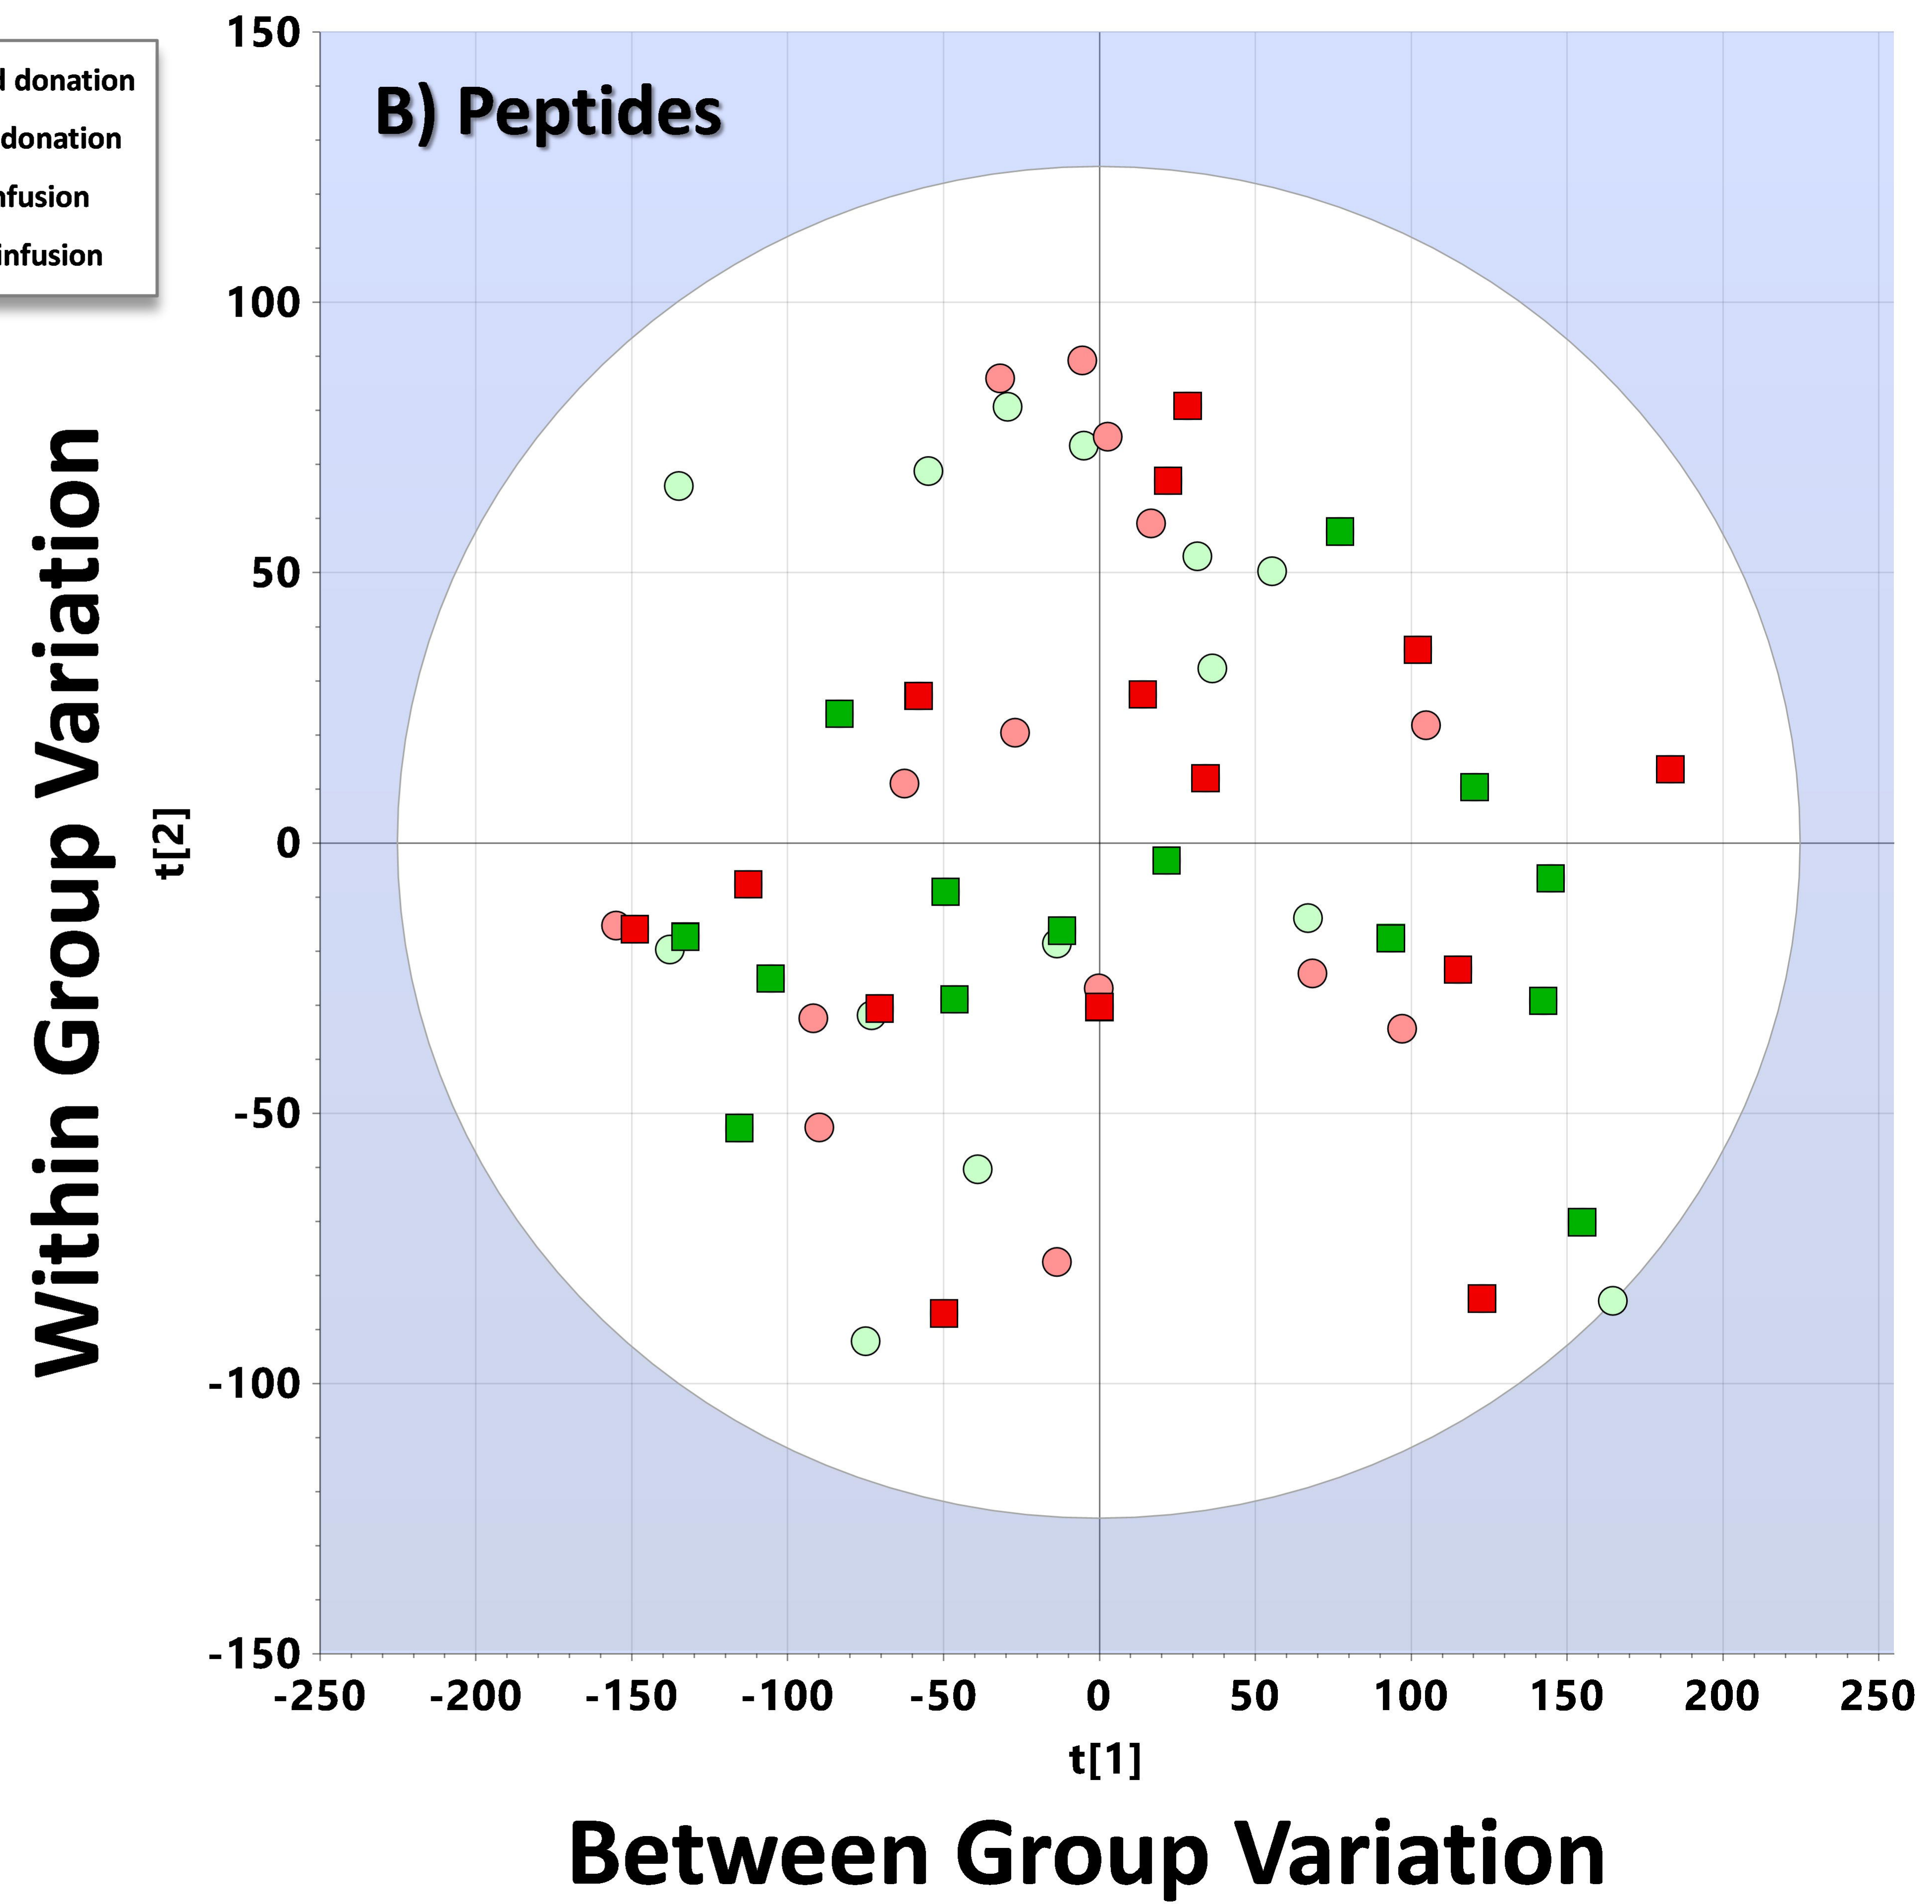

## Erythrocytes (cells $10^{12} \cdot L^{-1}$ )

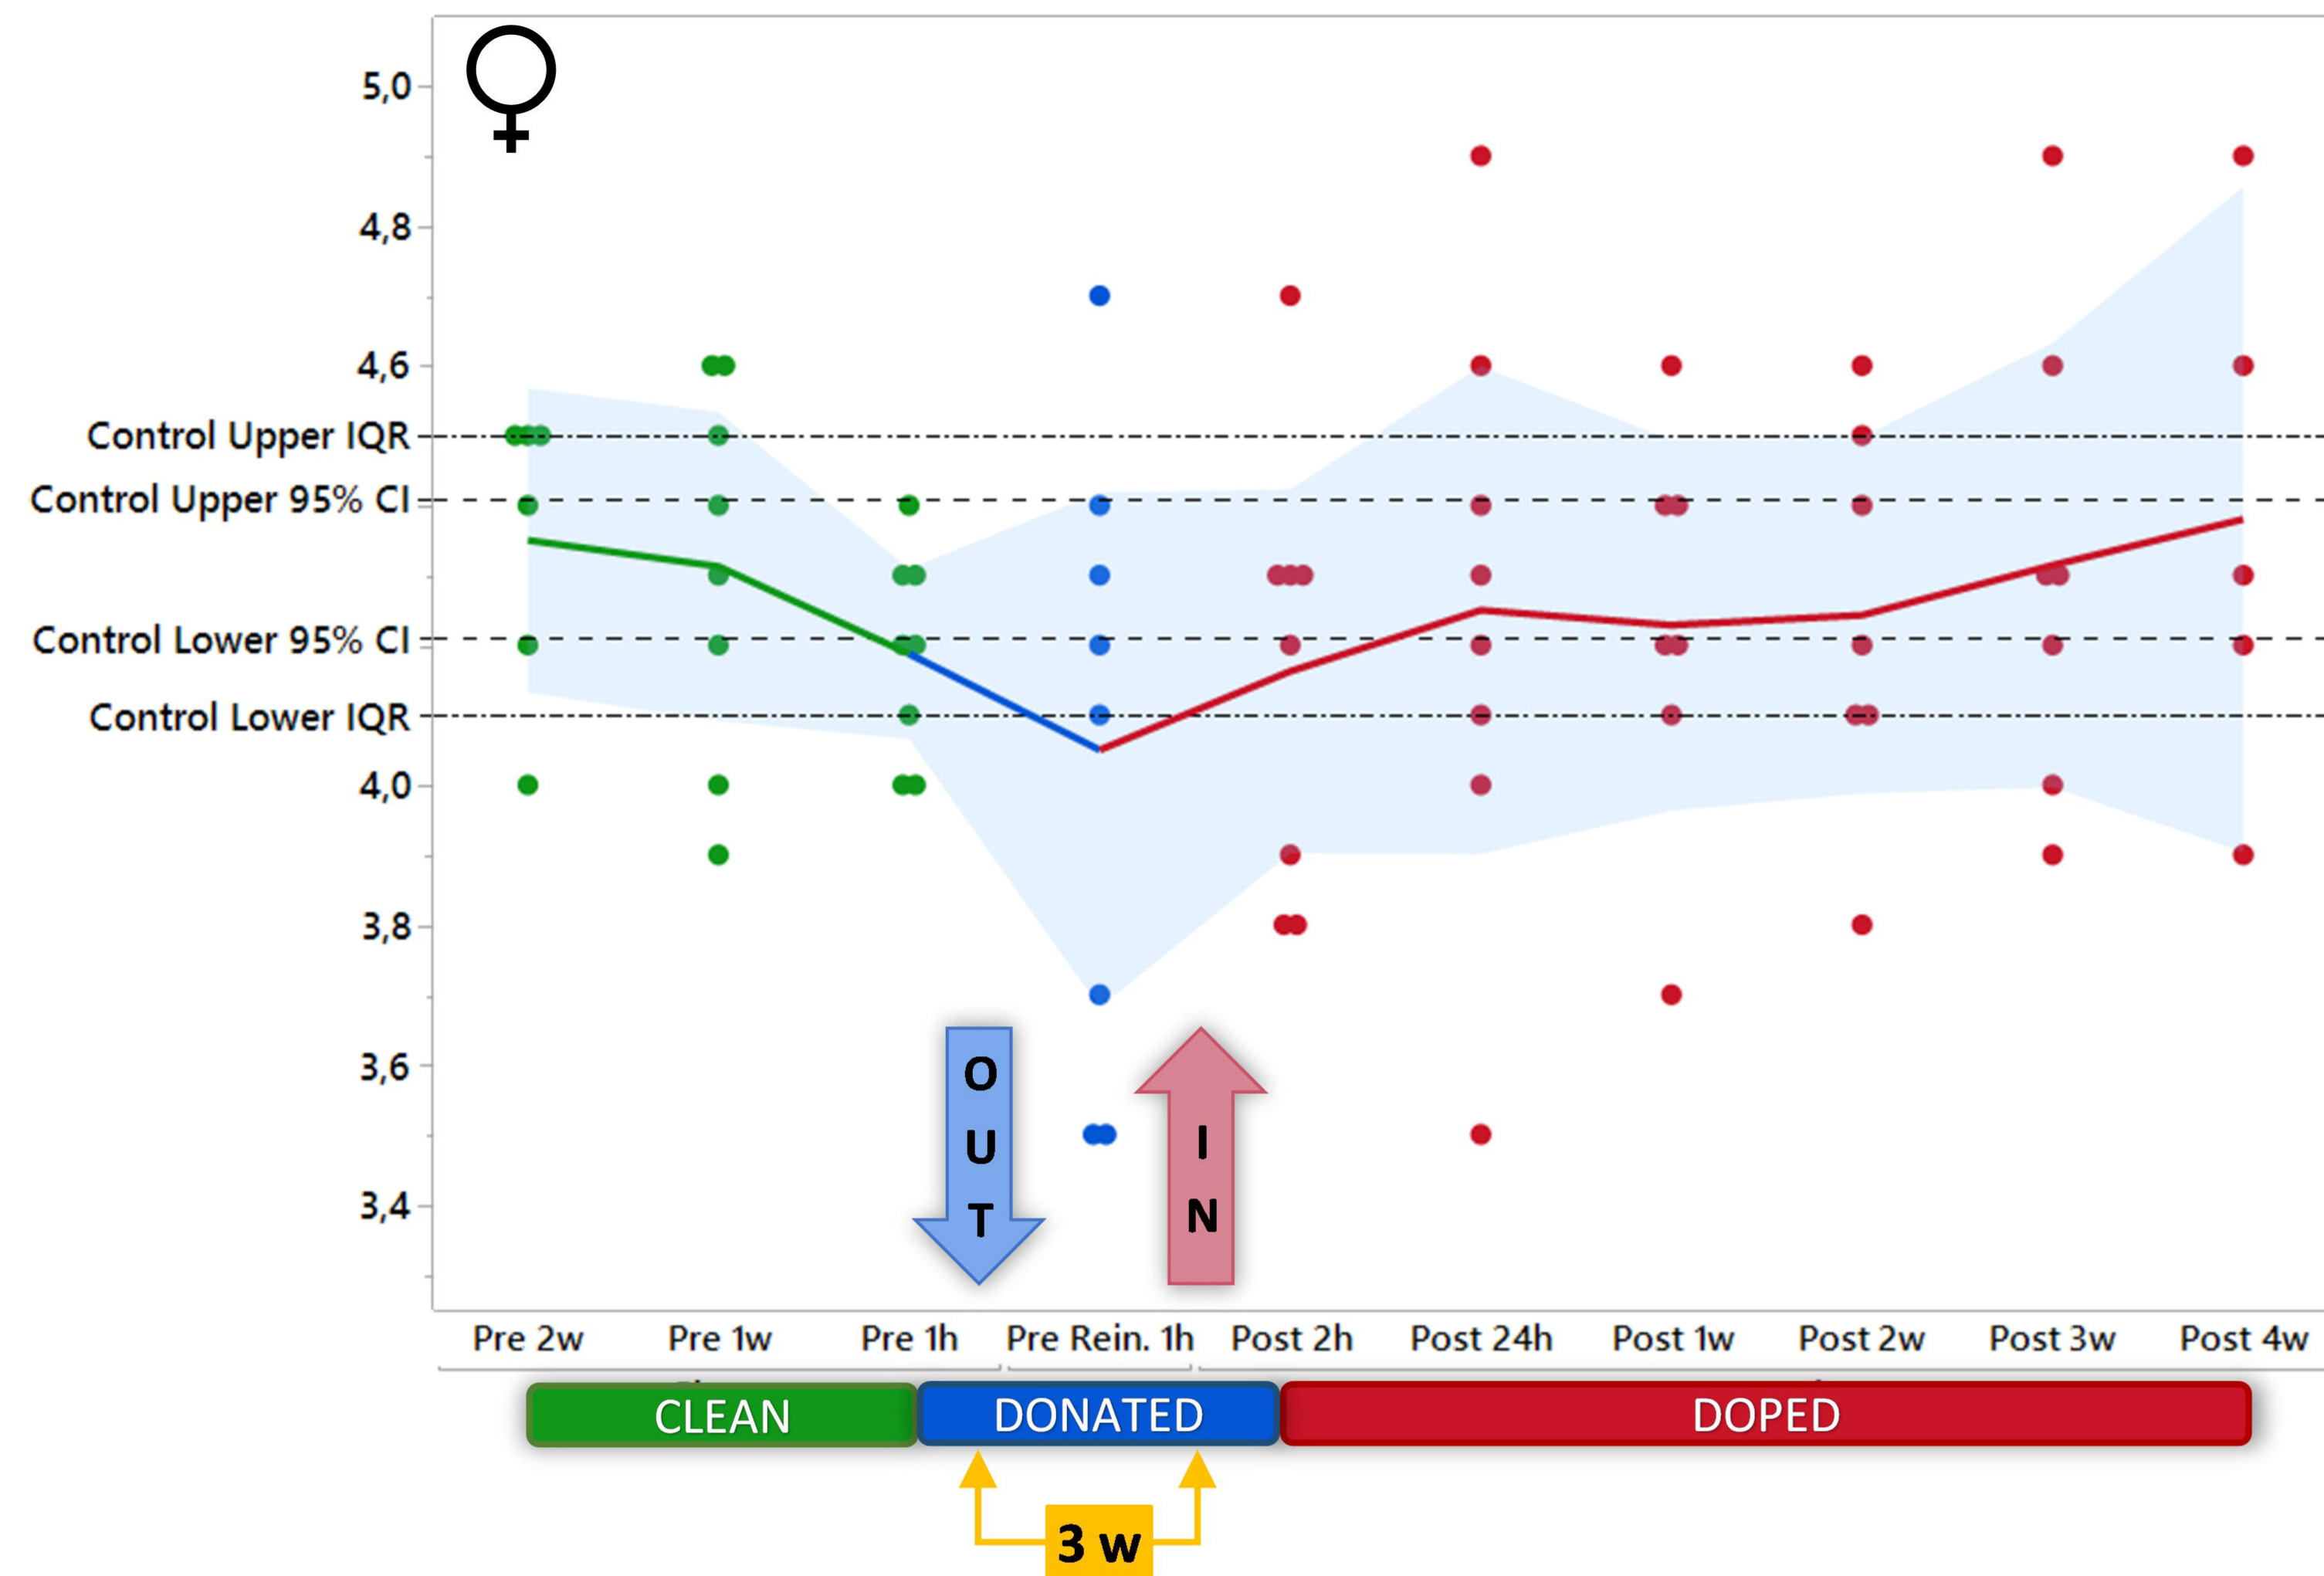

## Hemoglobin (g·L<sup>-1</sup>)

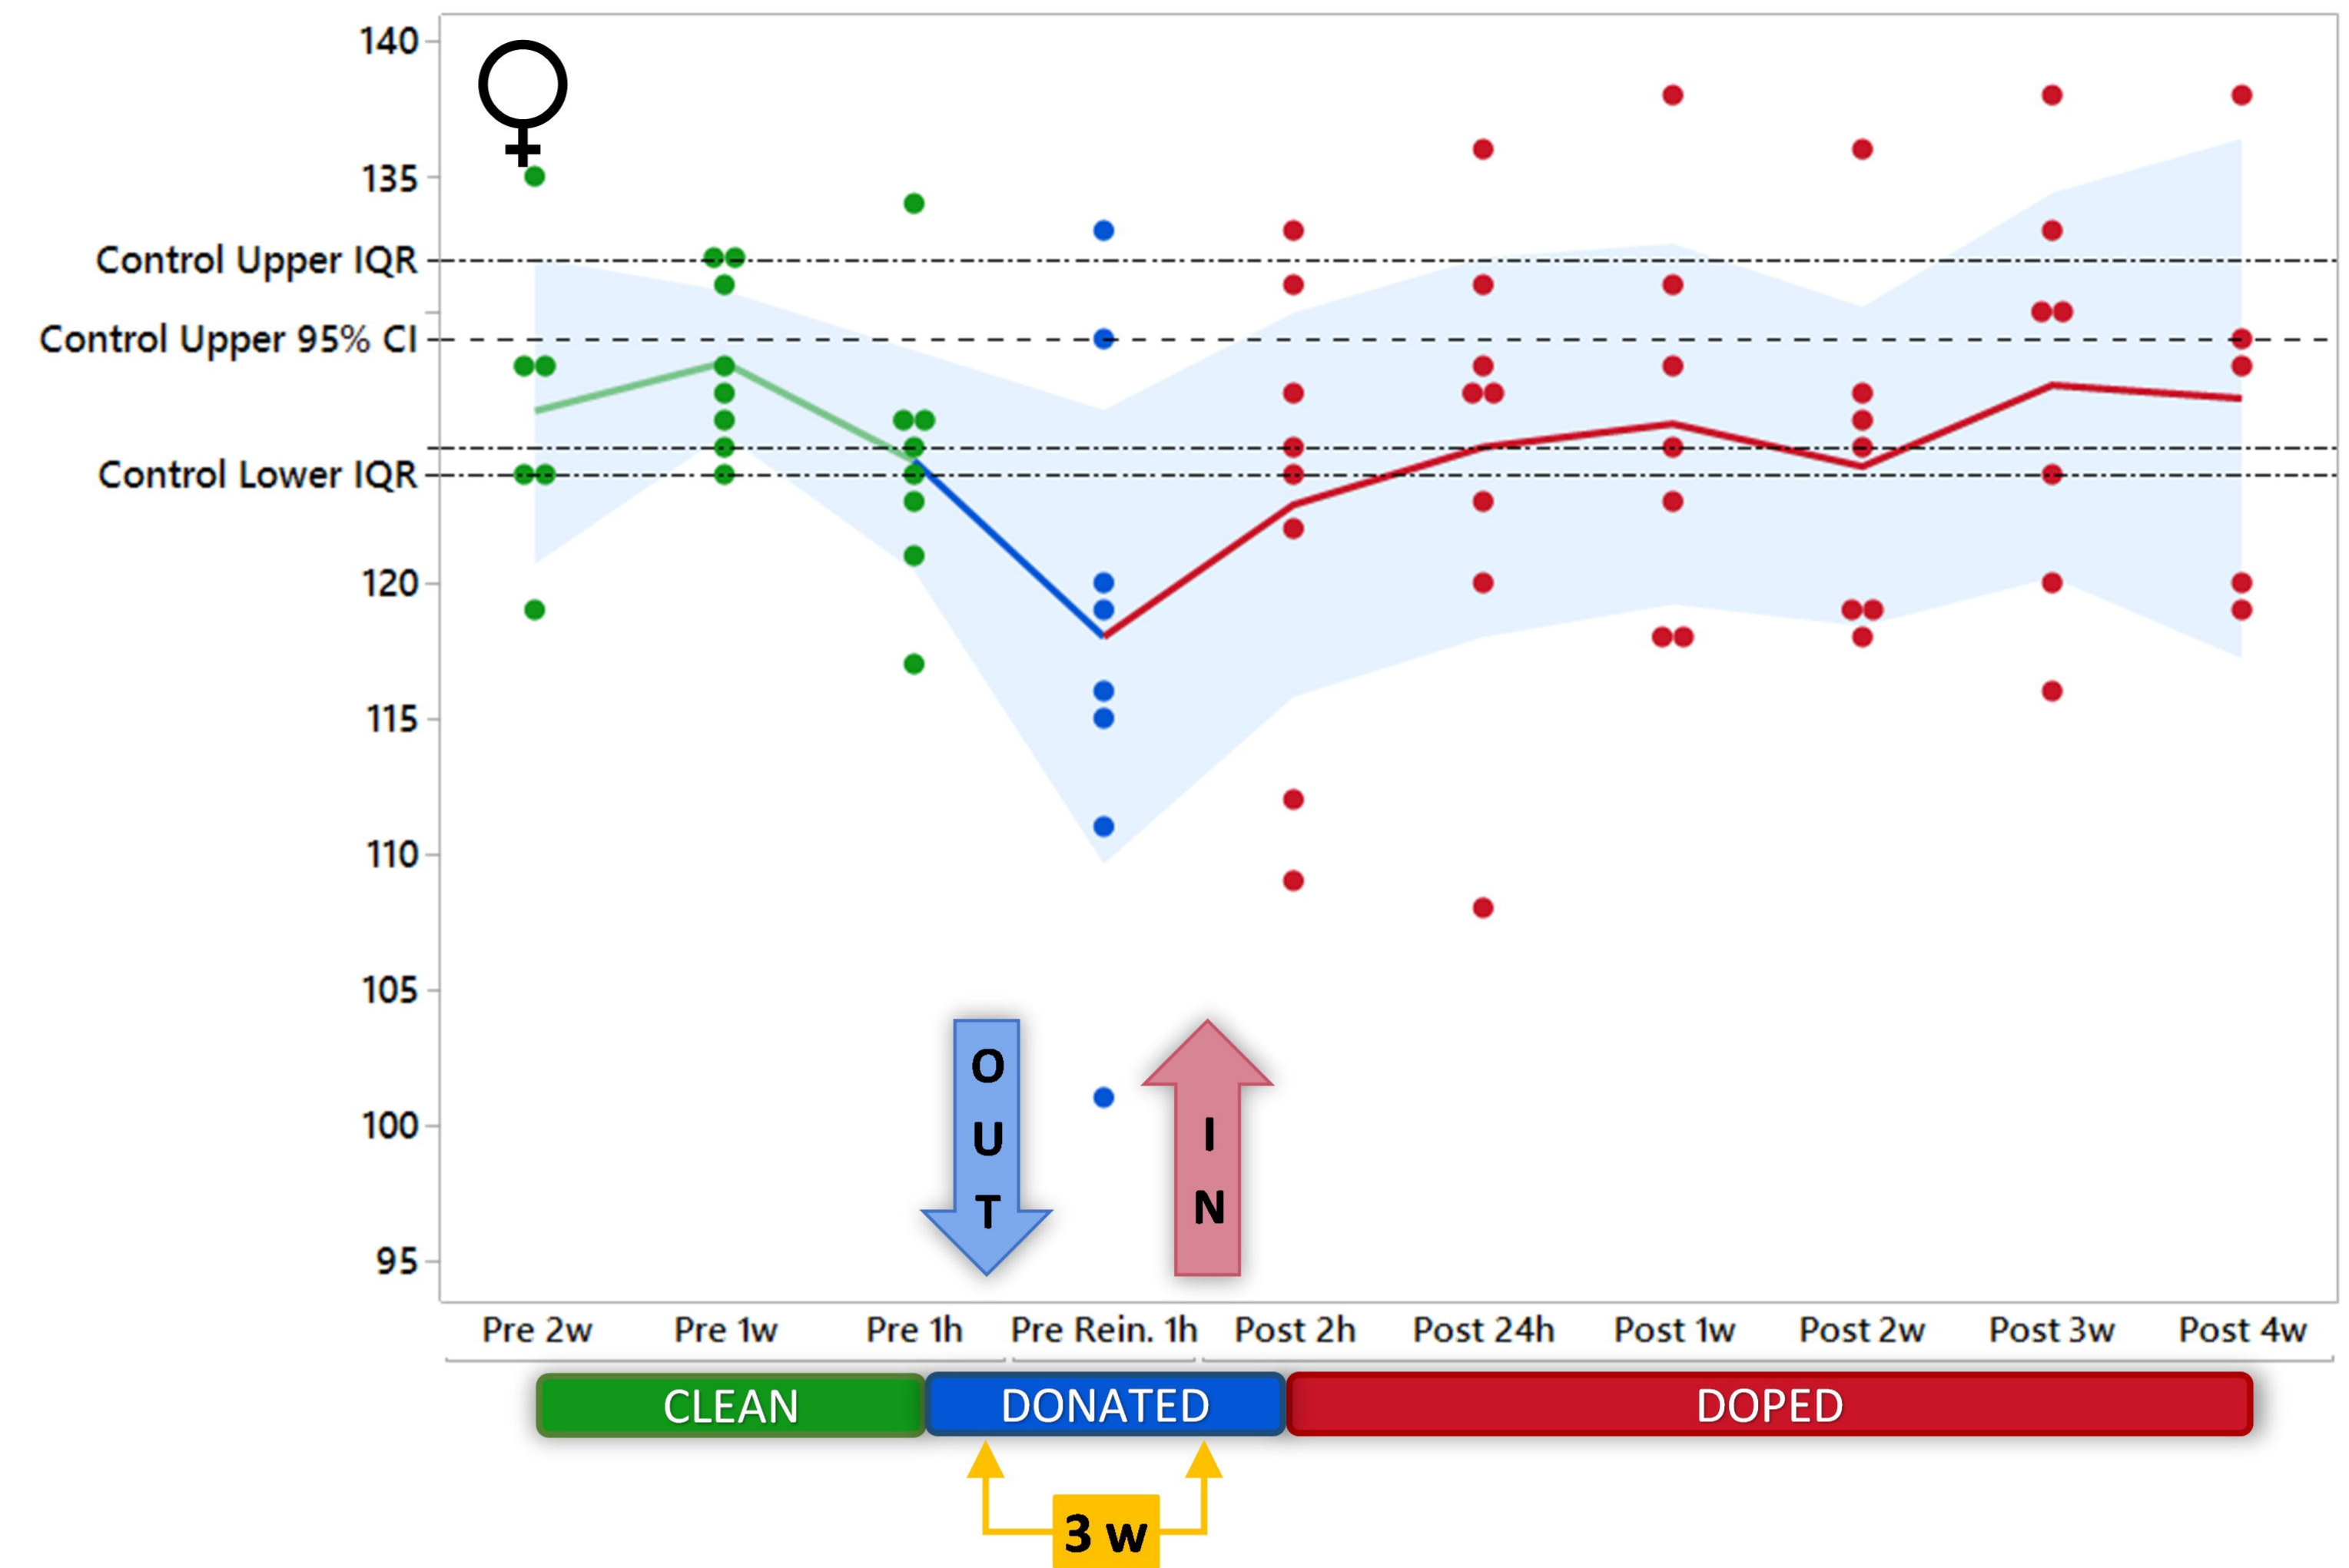

medRxiv preprint doi: <https://doi.org/10.1101/2020.07.04.20146217>; this version posted July 6, 2020. The copyright holder for this preprint (which was not certified by peer review) is the author/funder, who has granted medRxiv a license to display the preprint in perpetuity. It is made available under a CC-BY-NC-ND 4.0 International license.

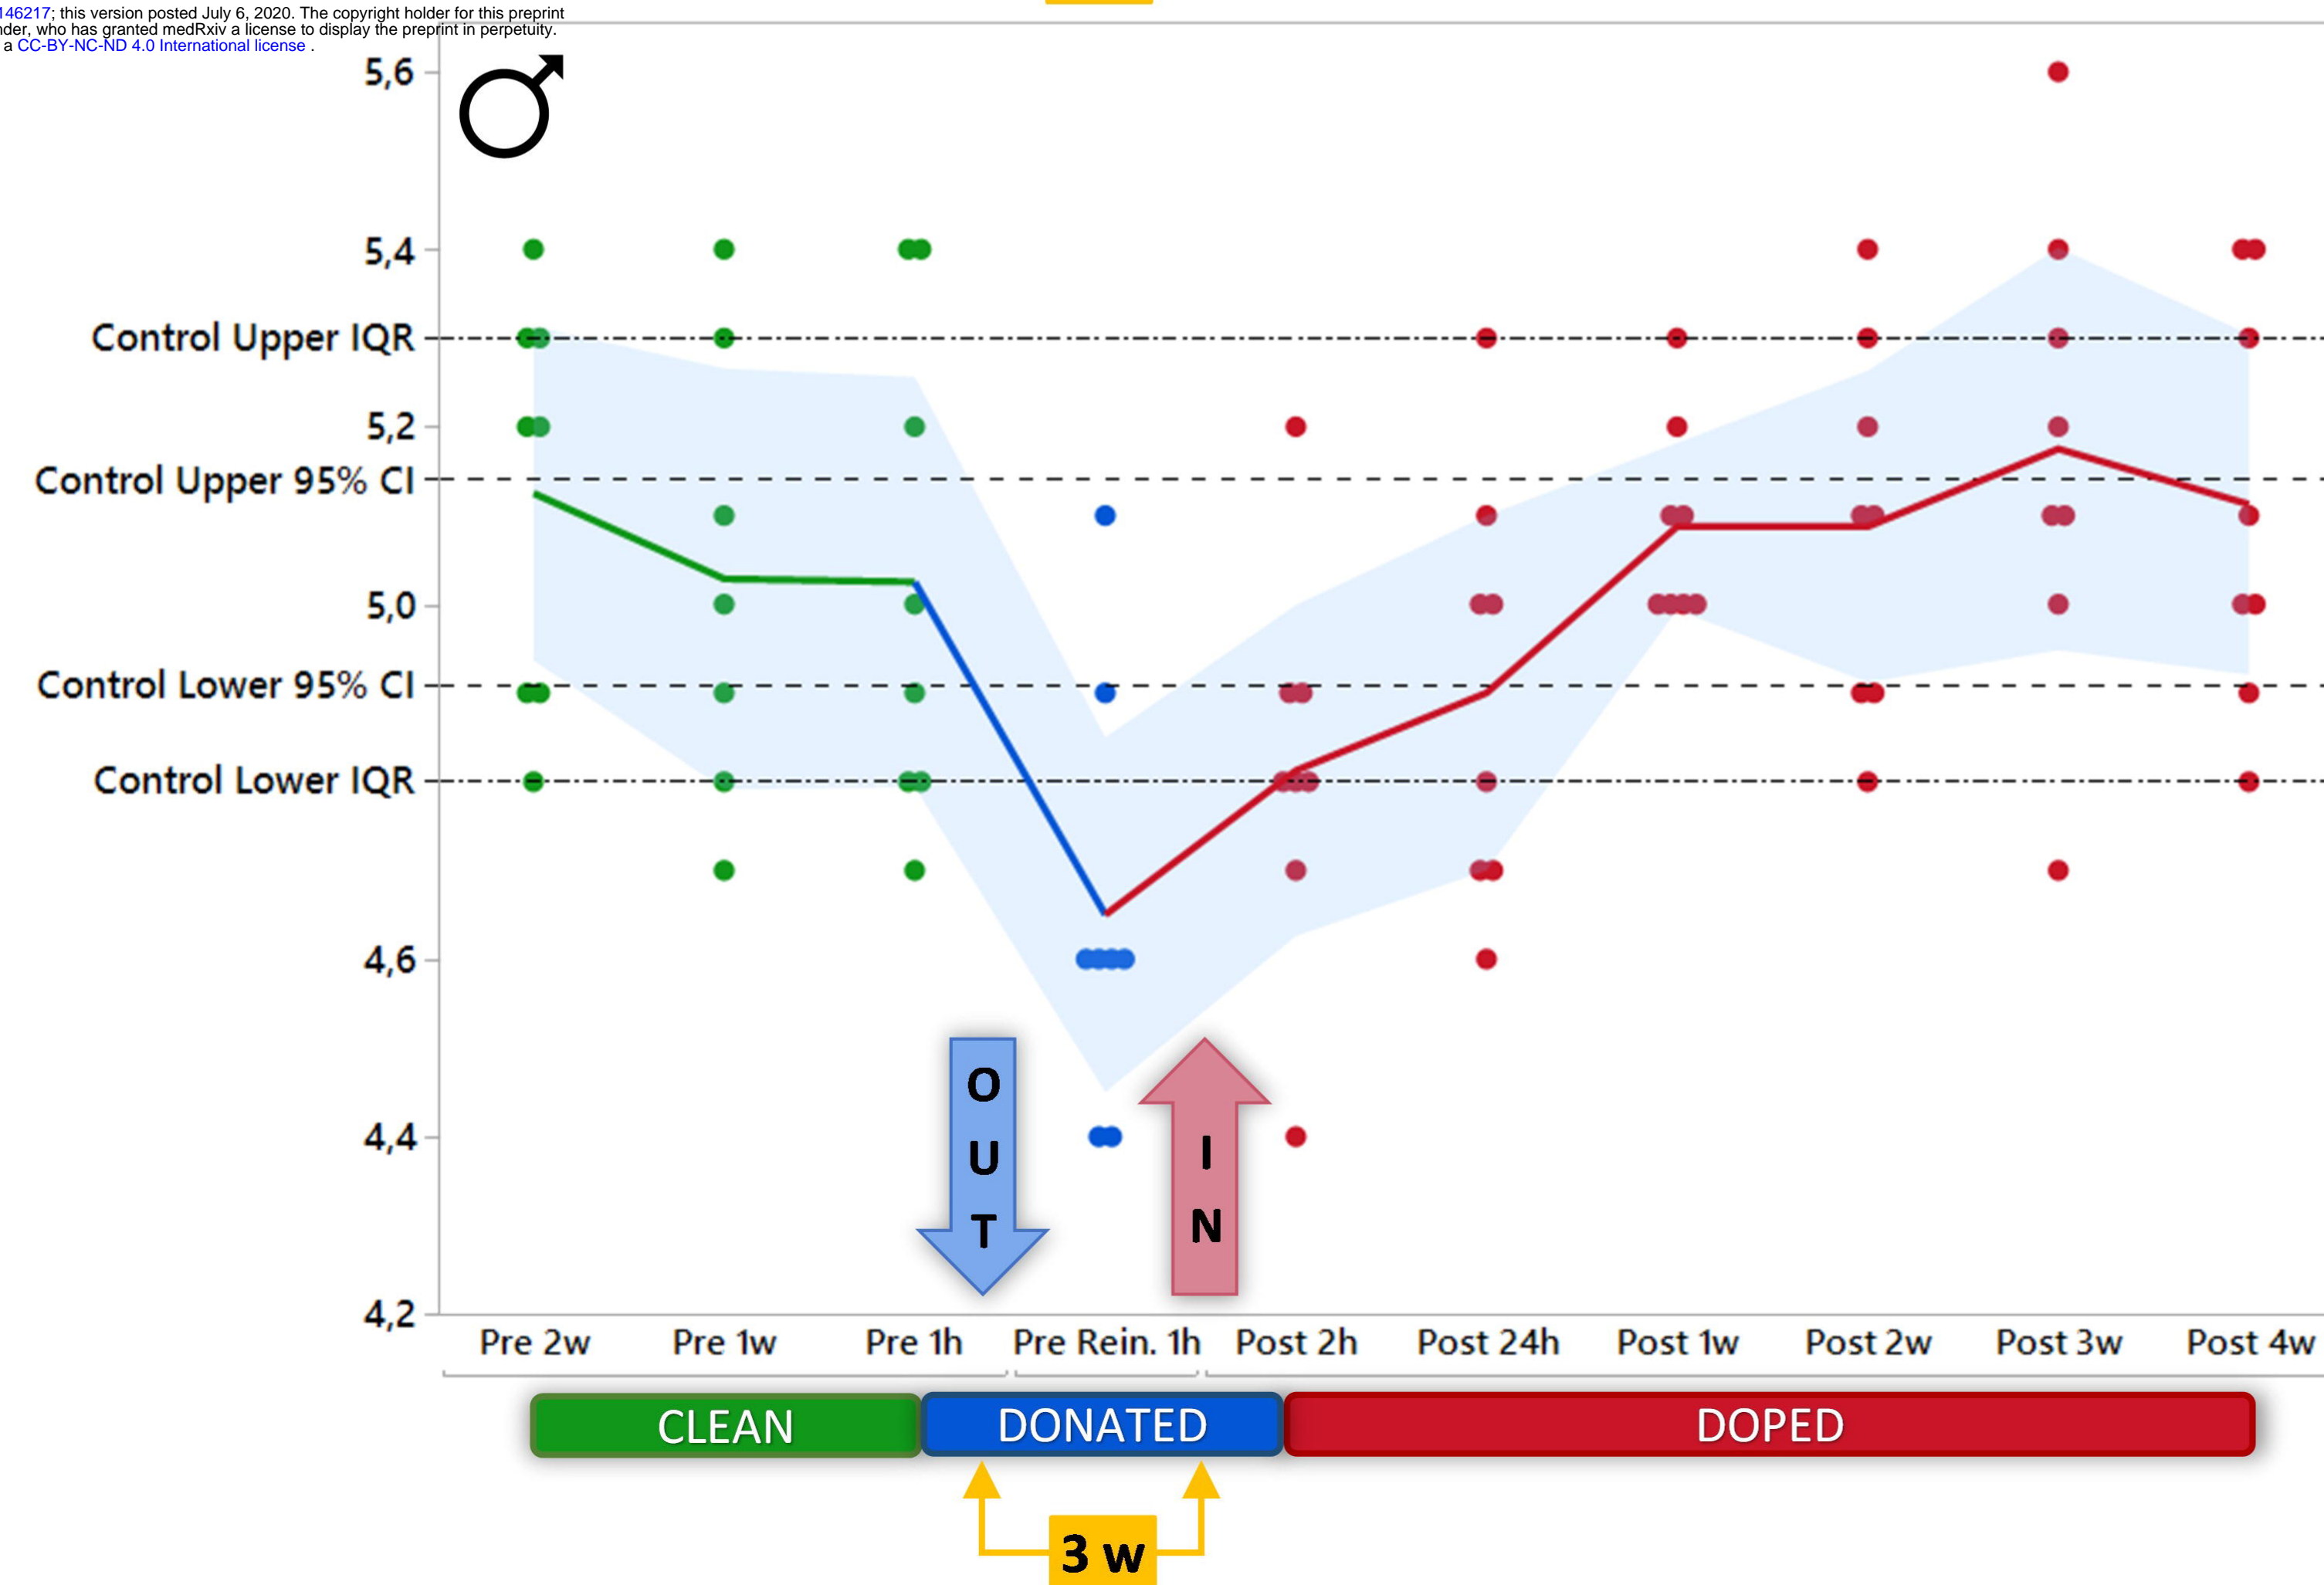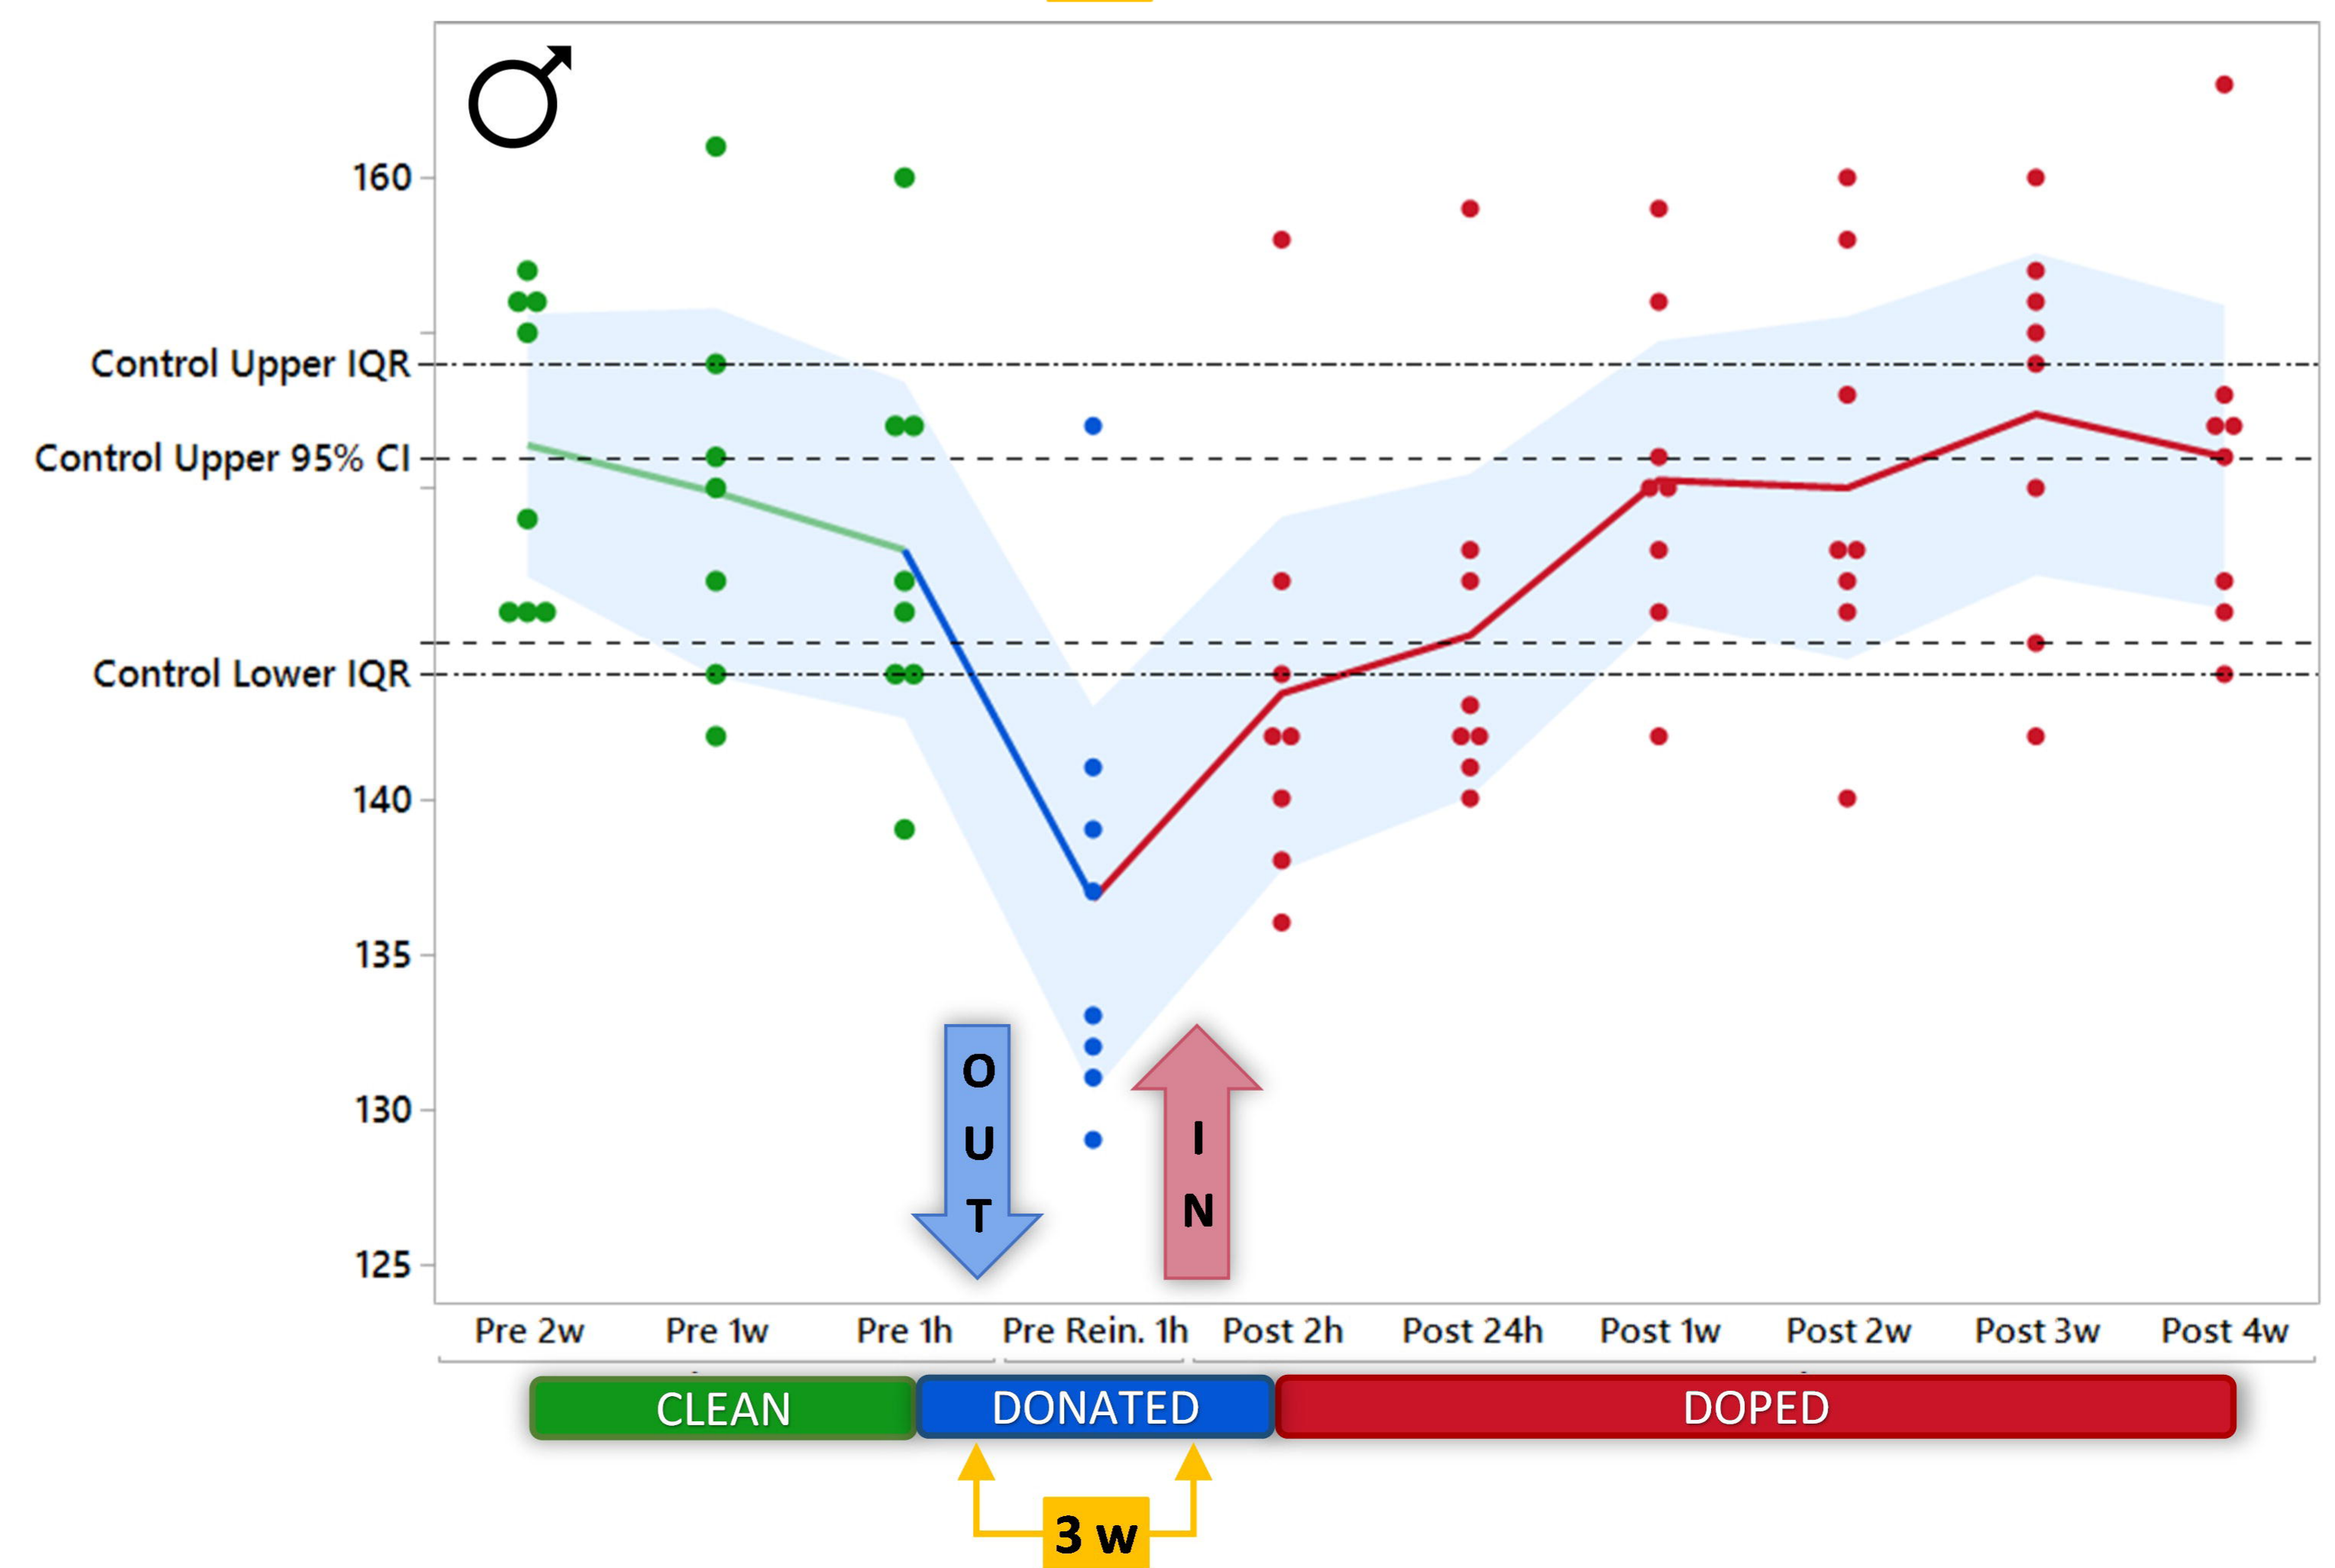



# Hematology

## OPLS-DA

## ROC

## Biomarker Selection

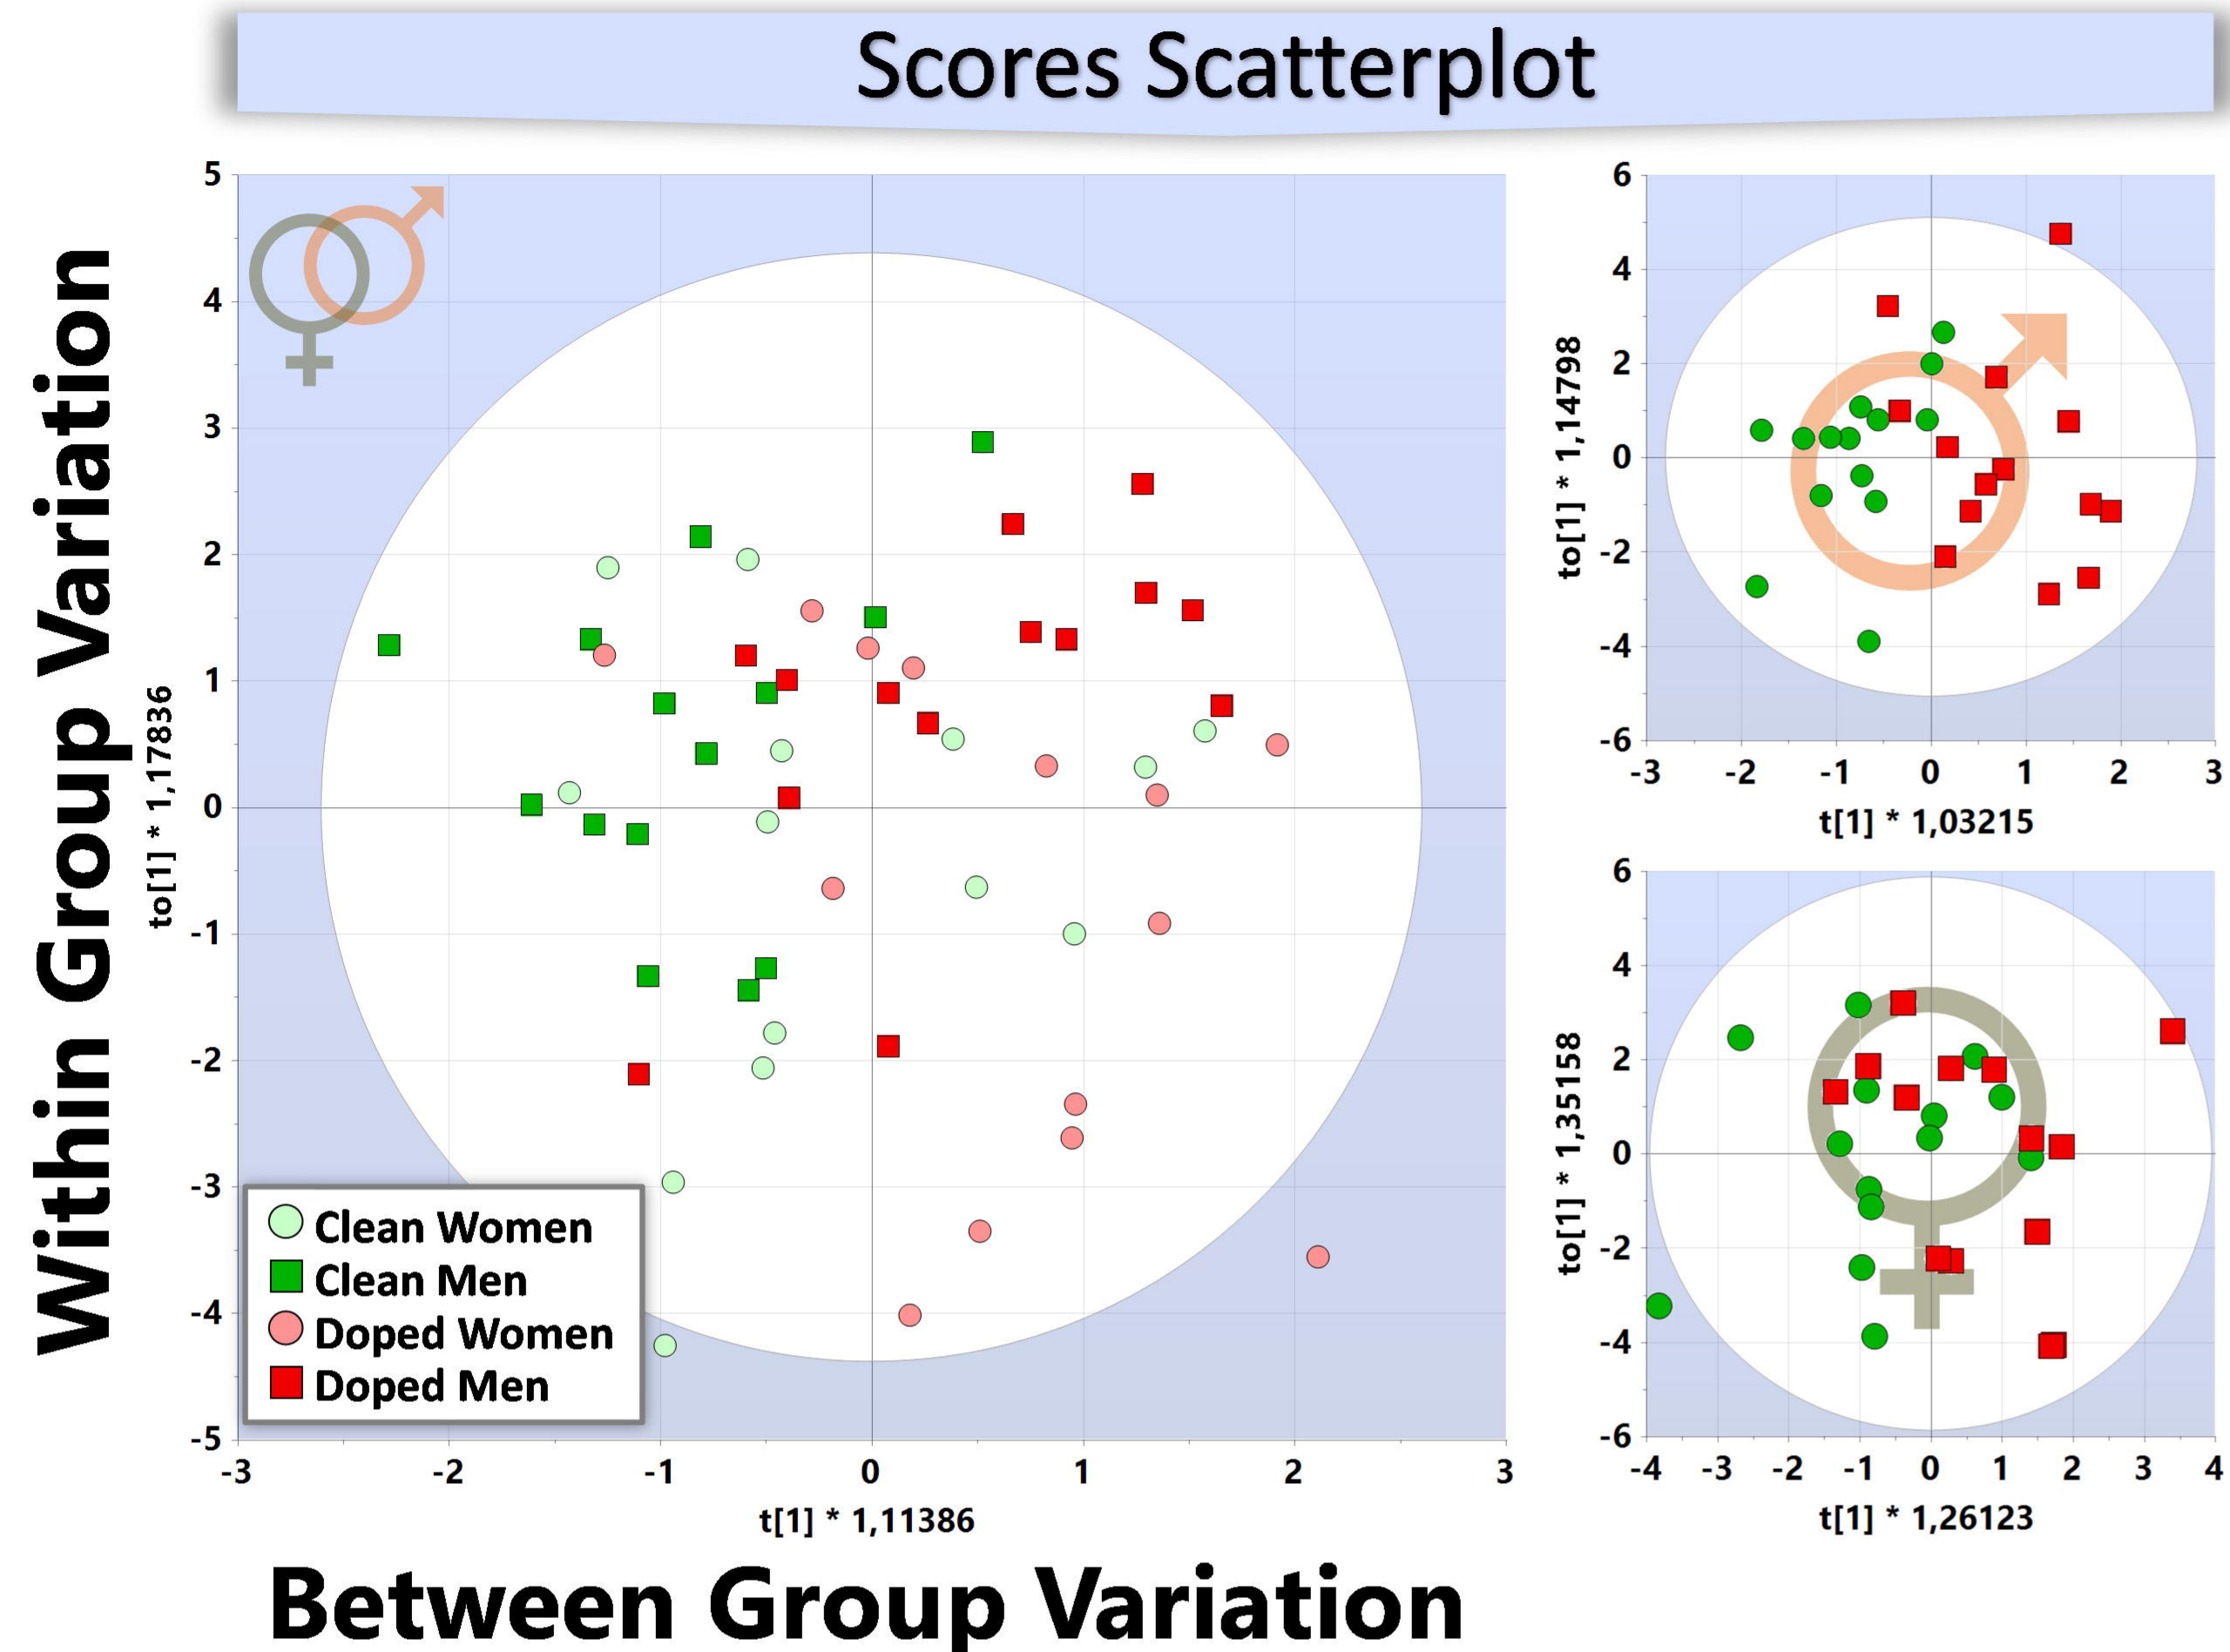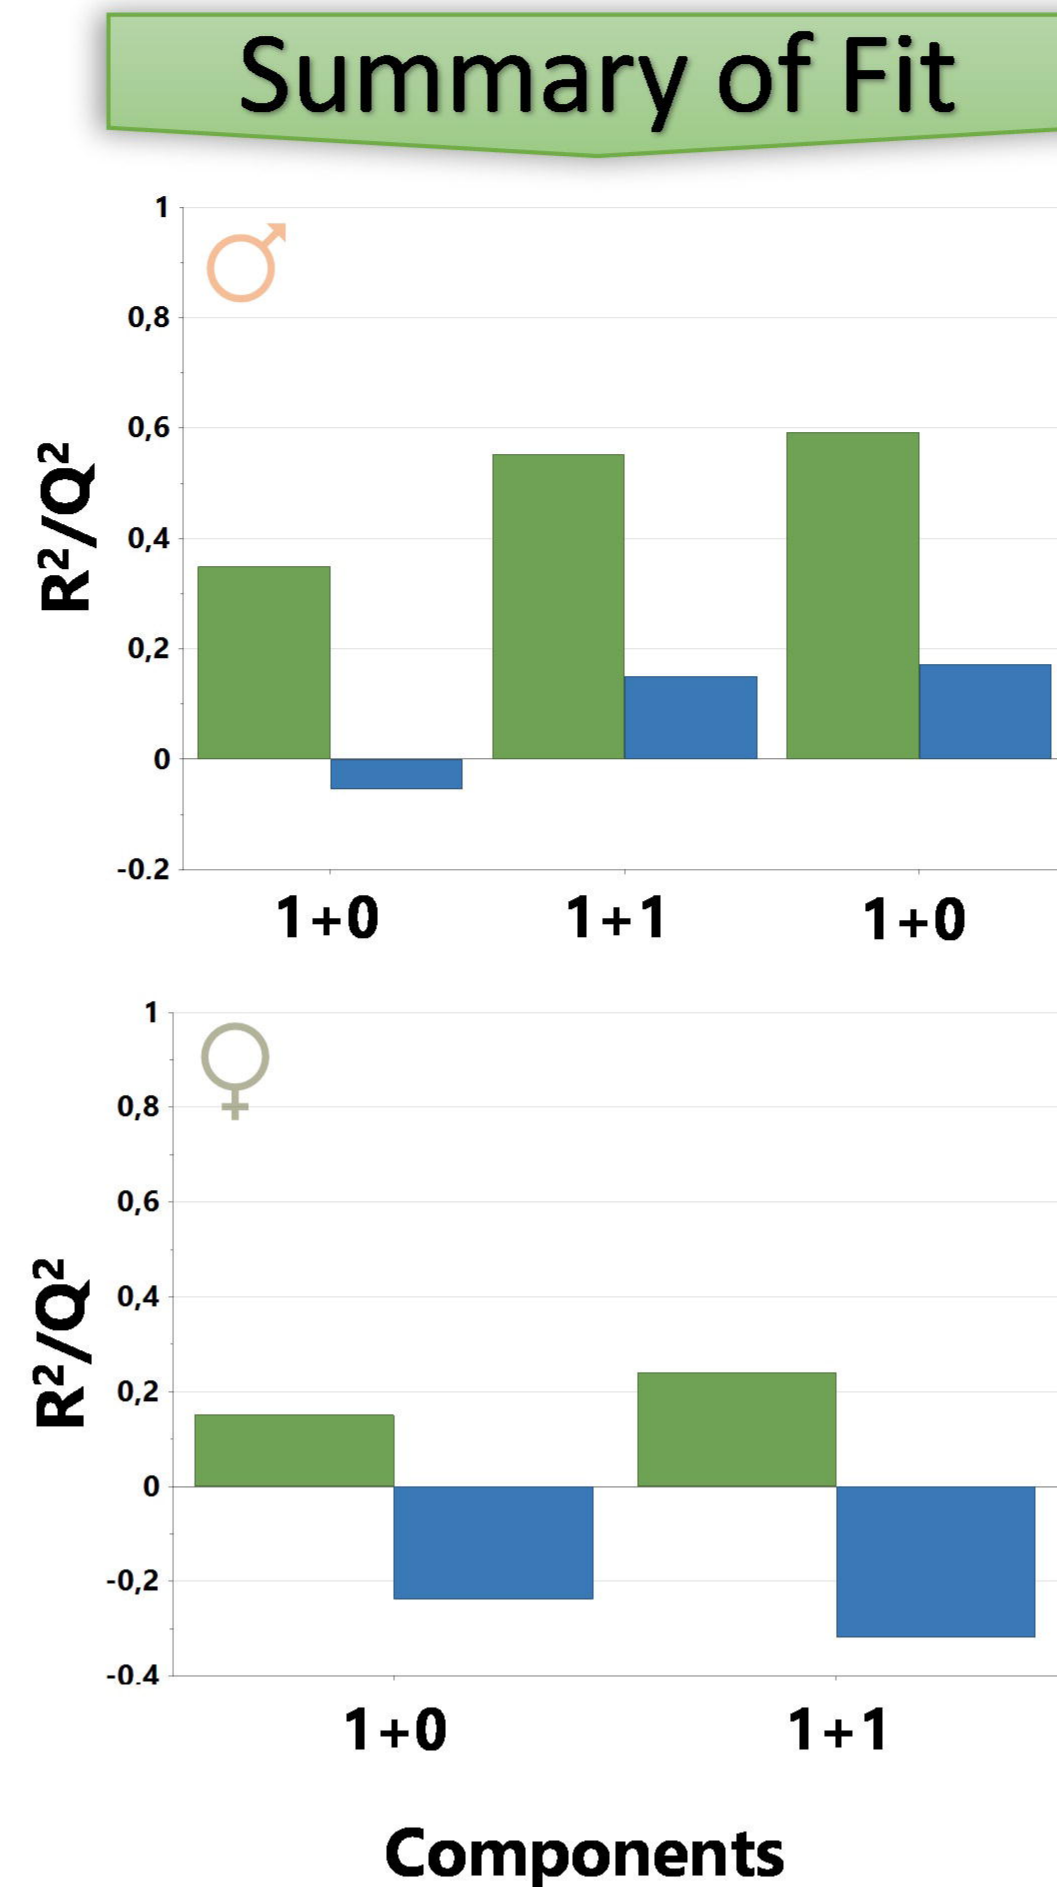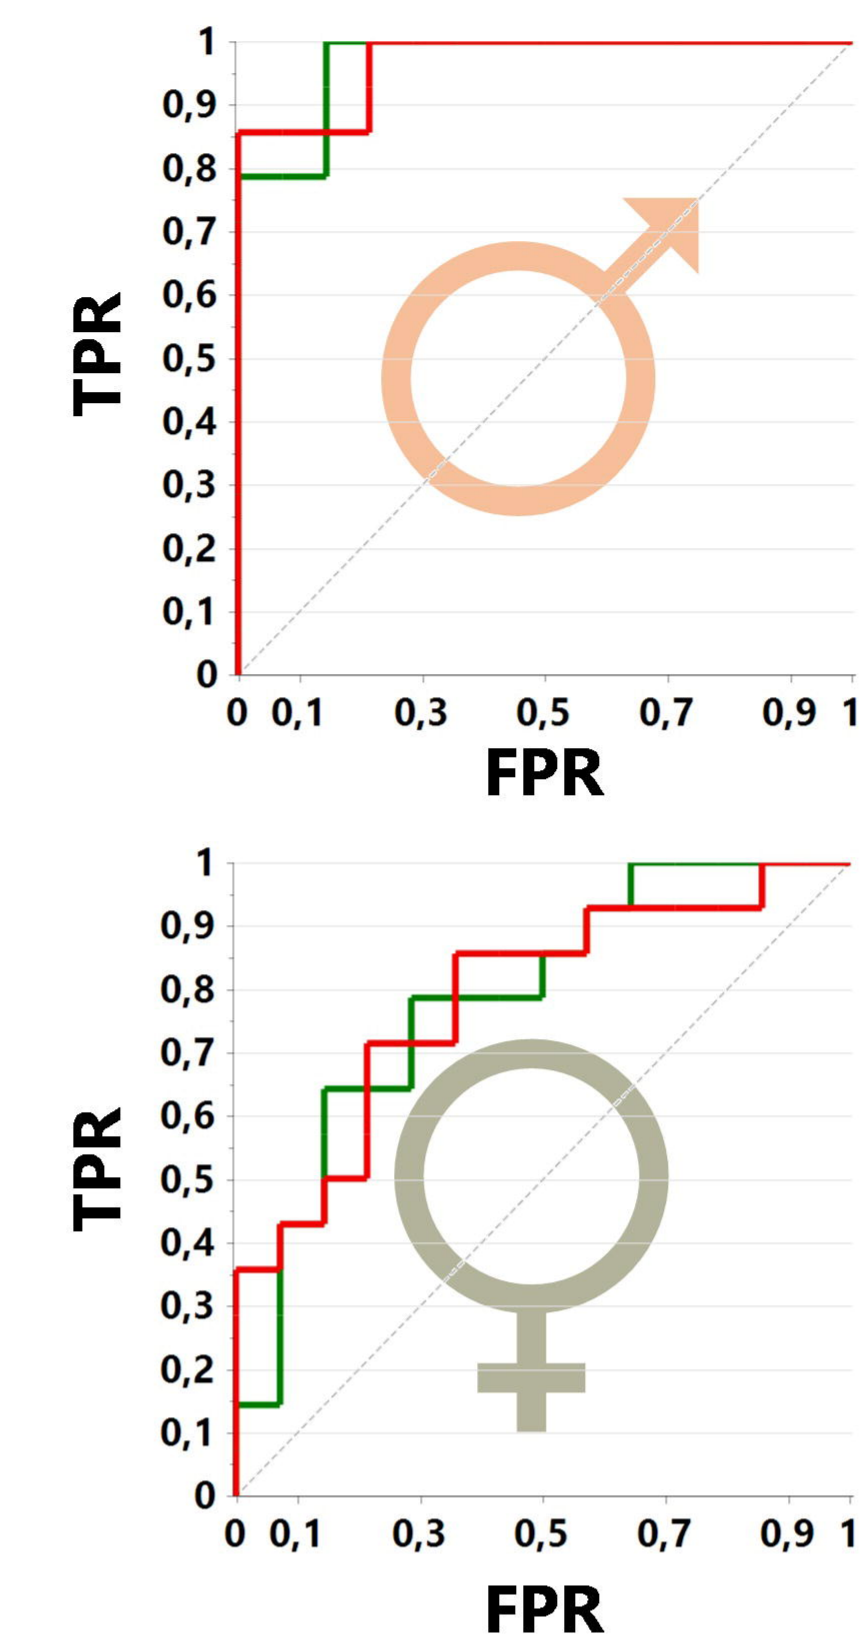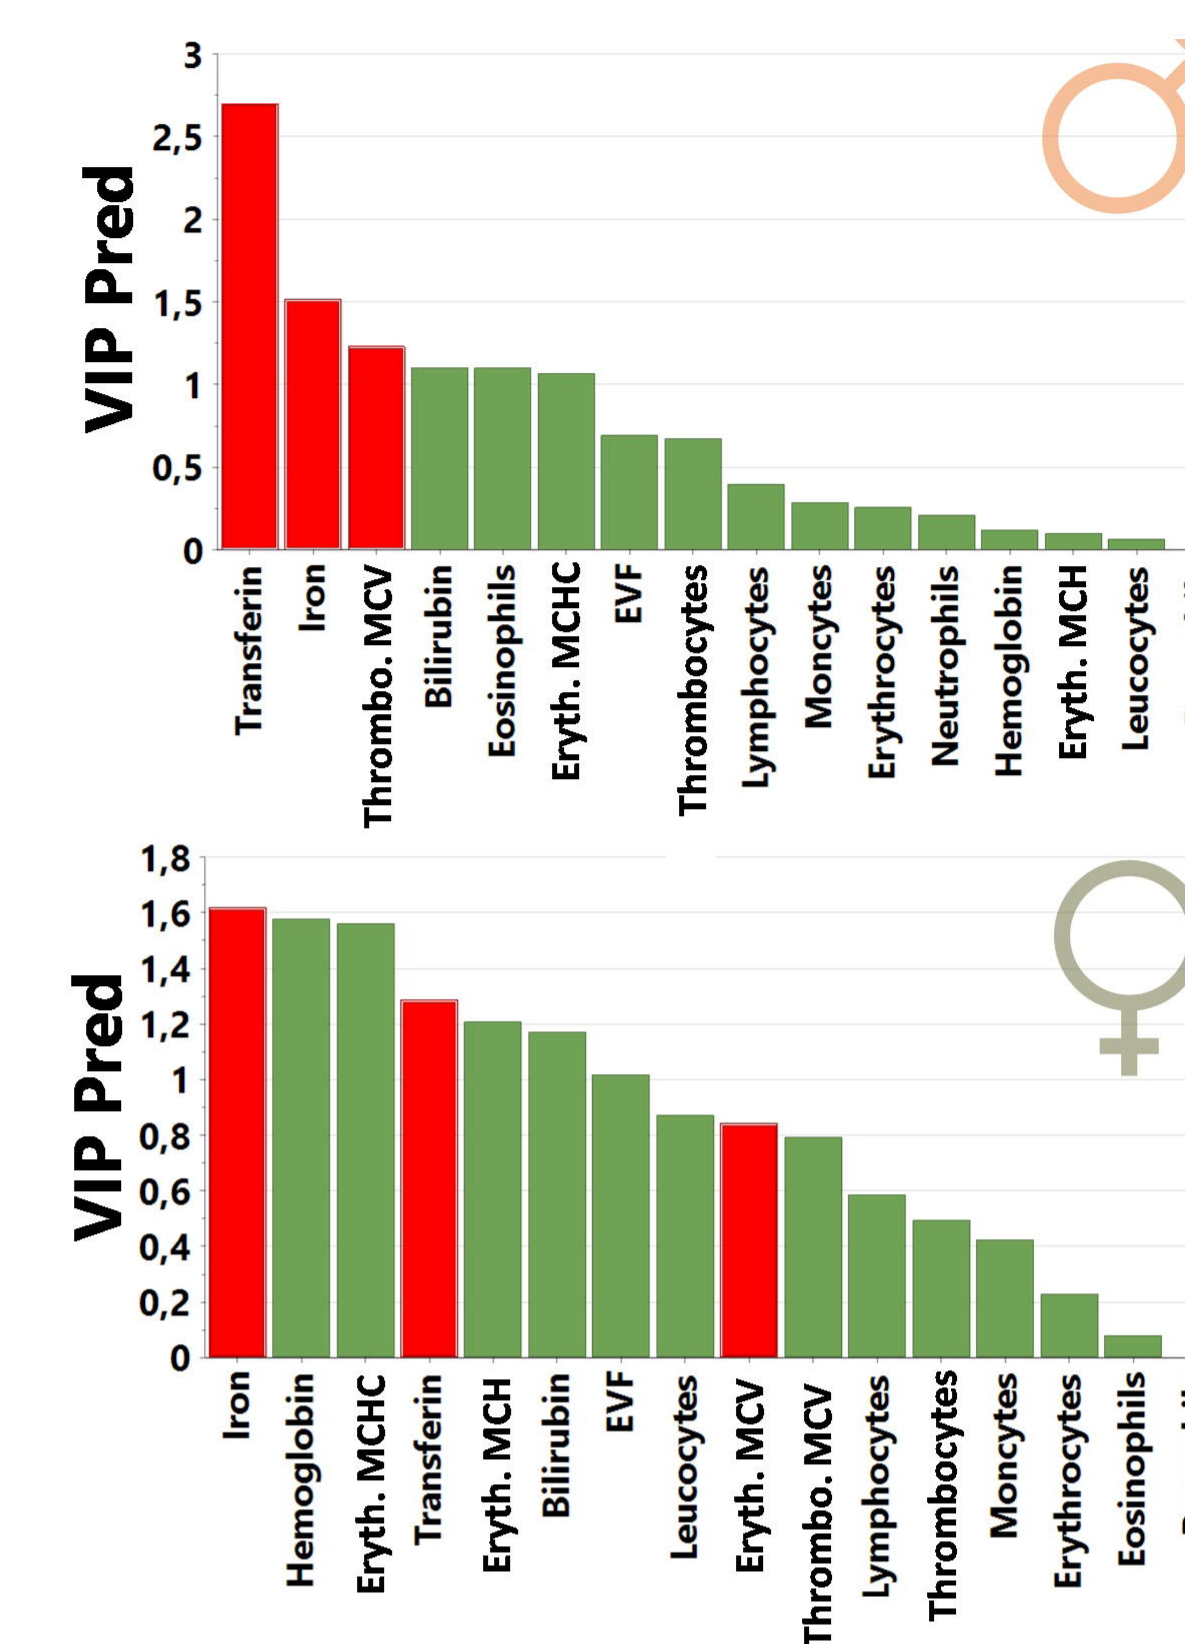

# Peptidomics

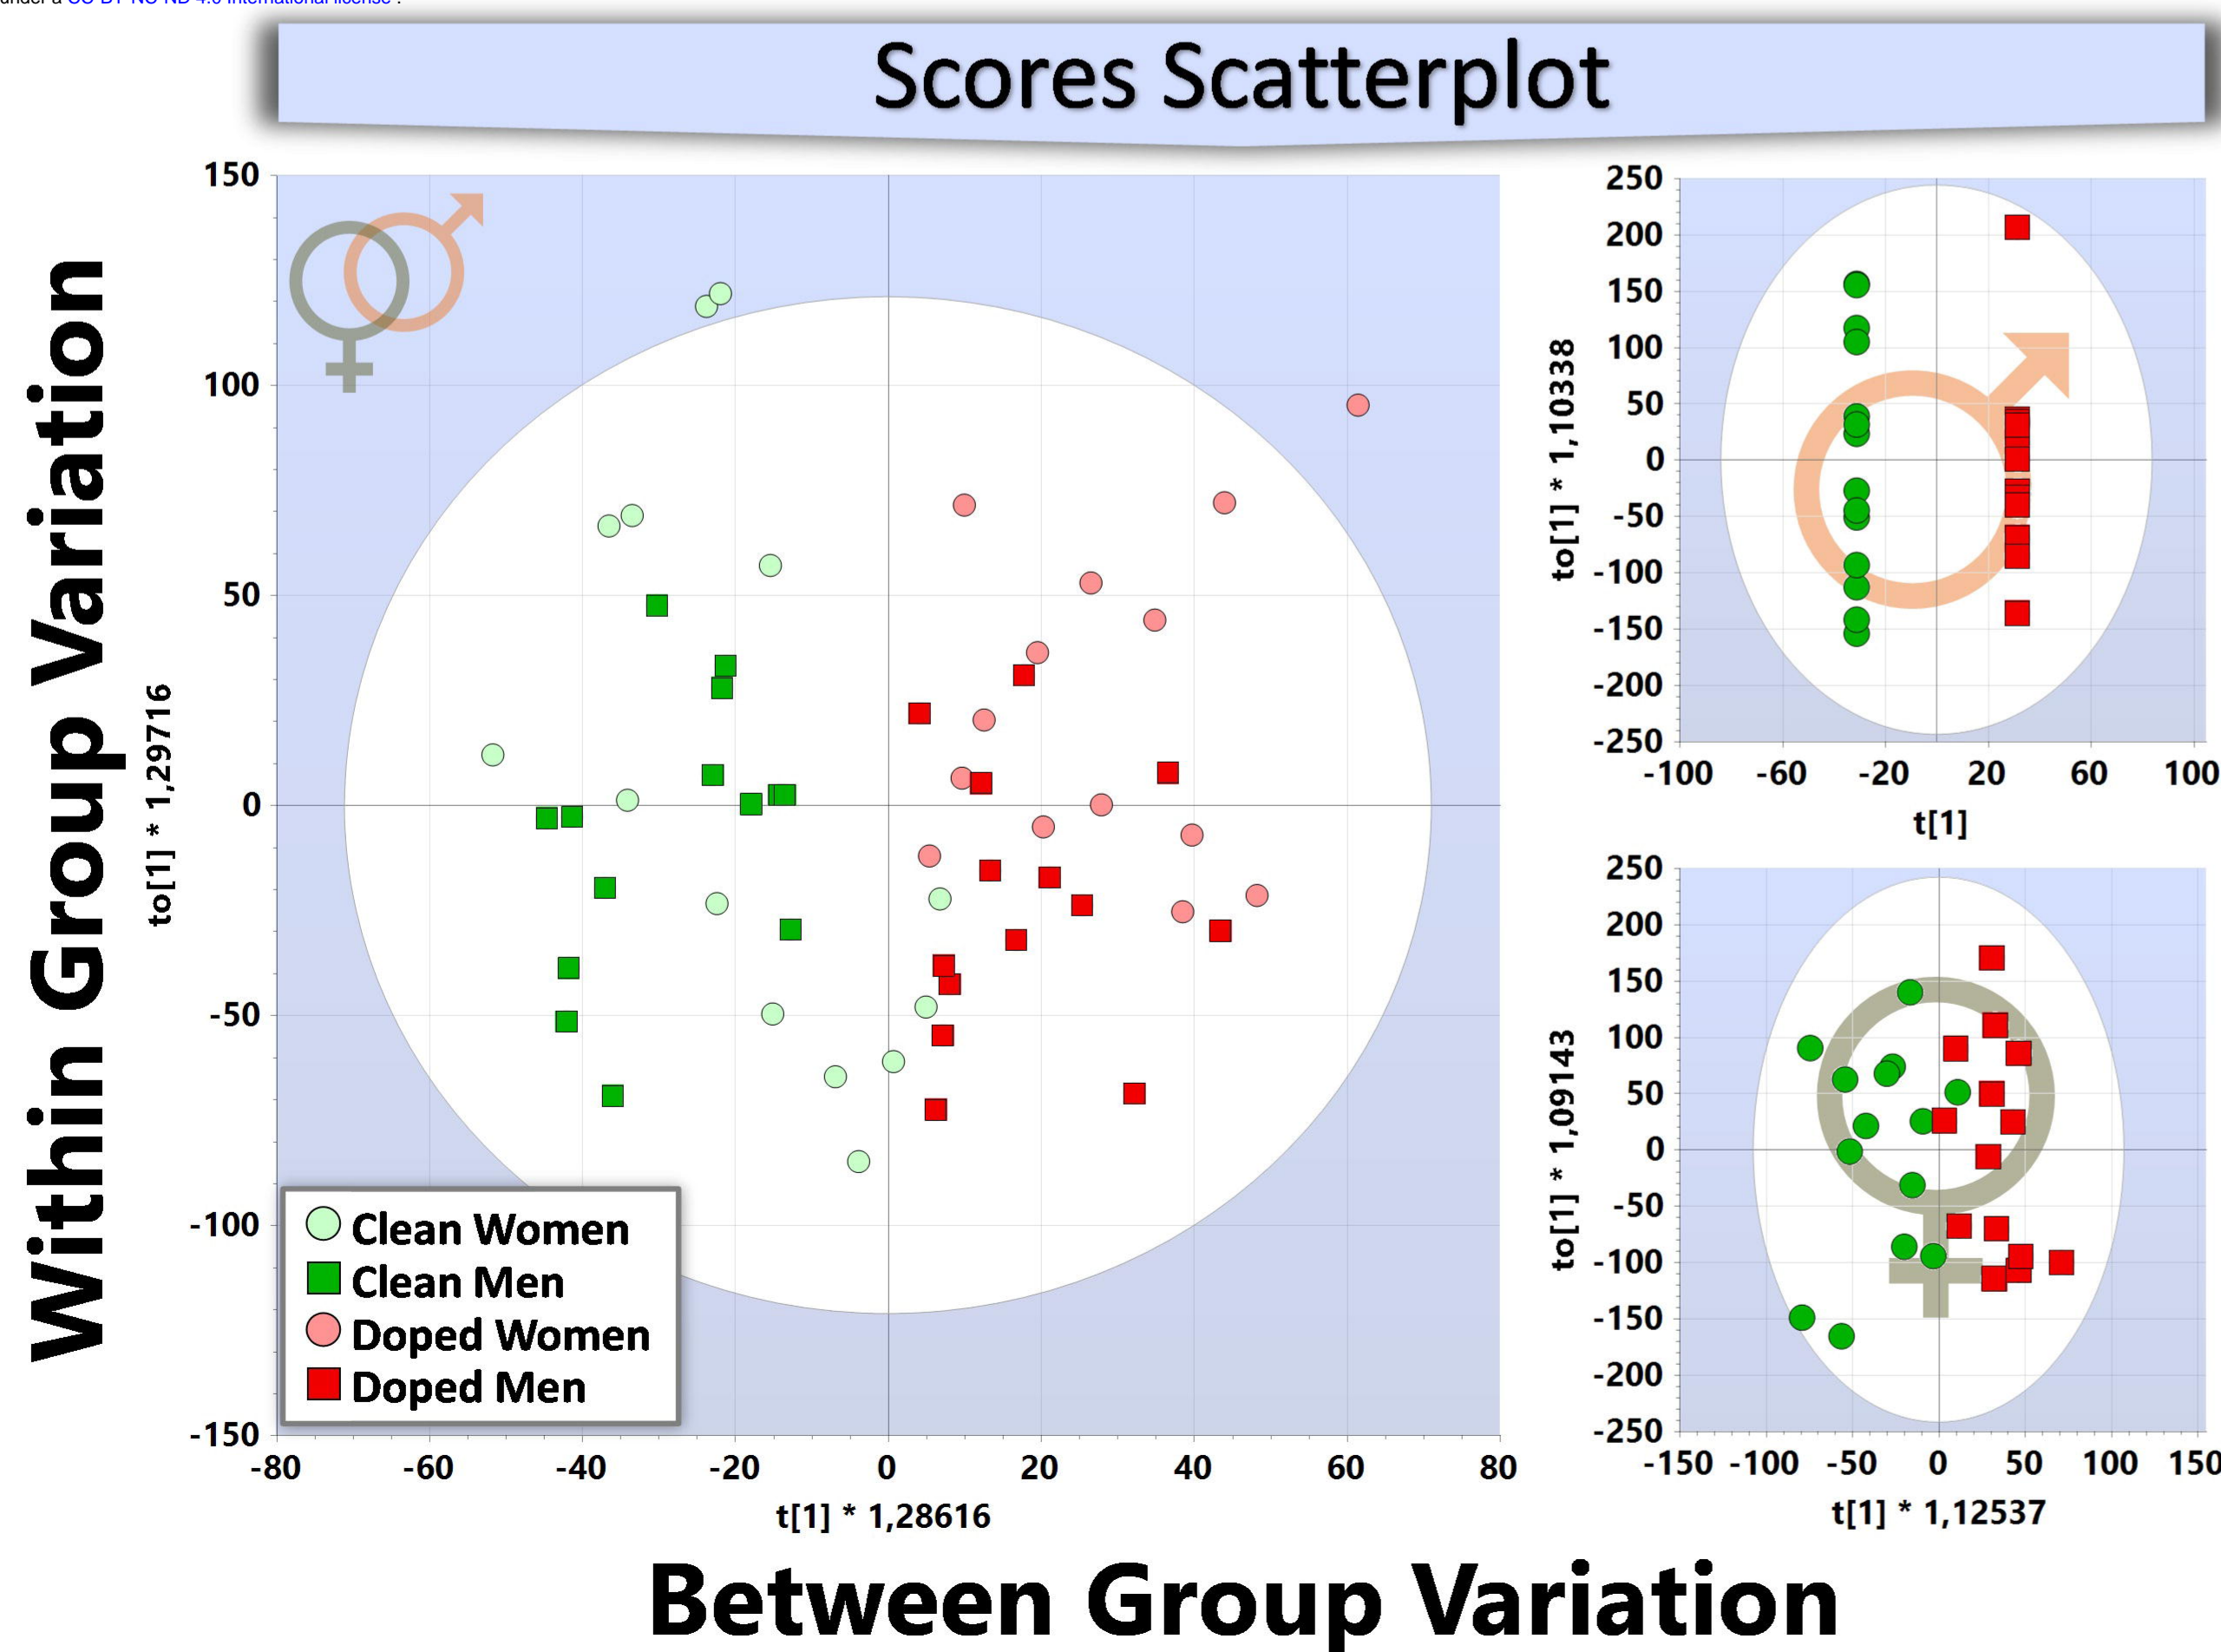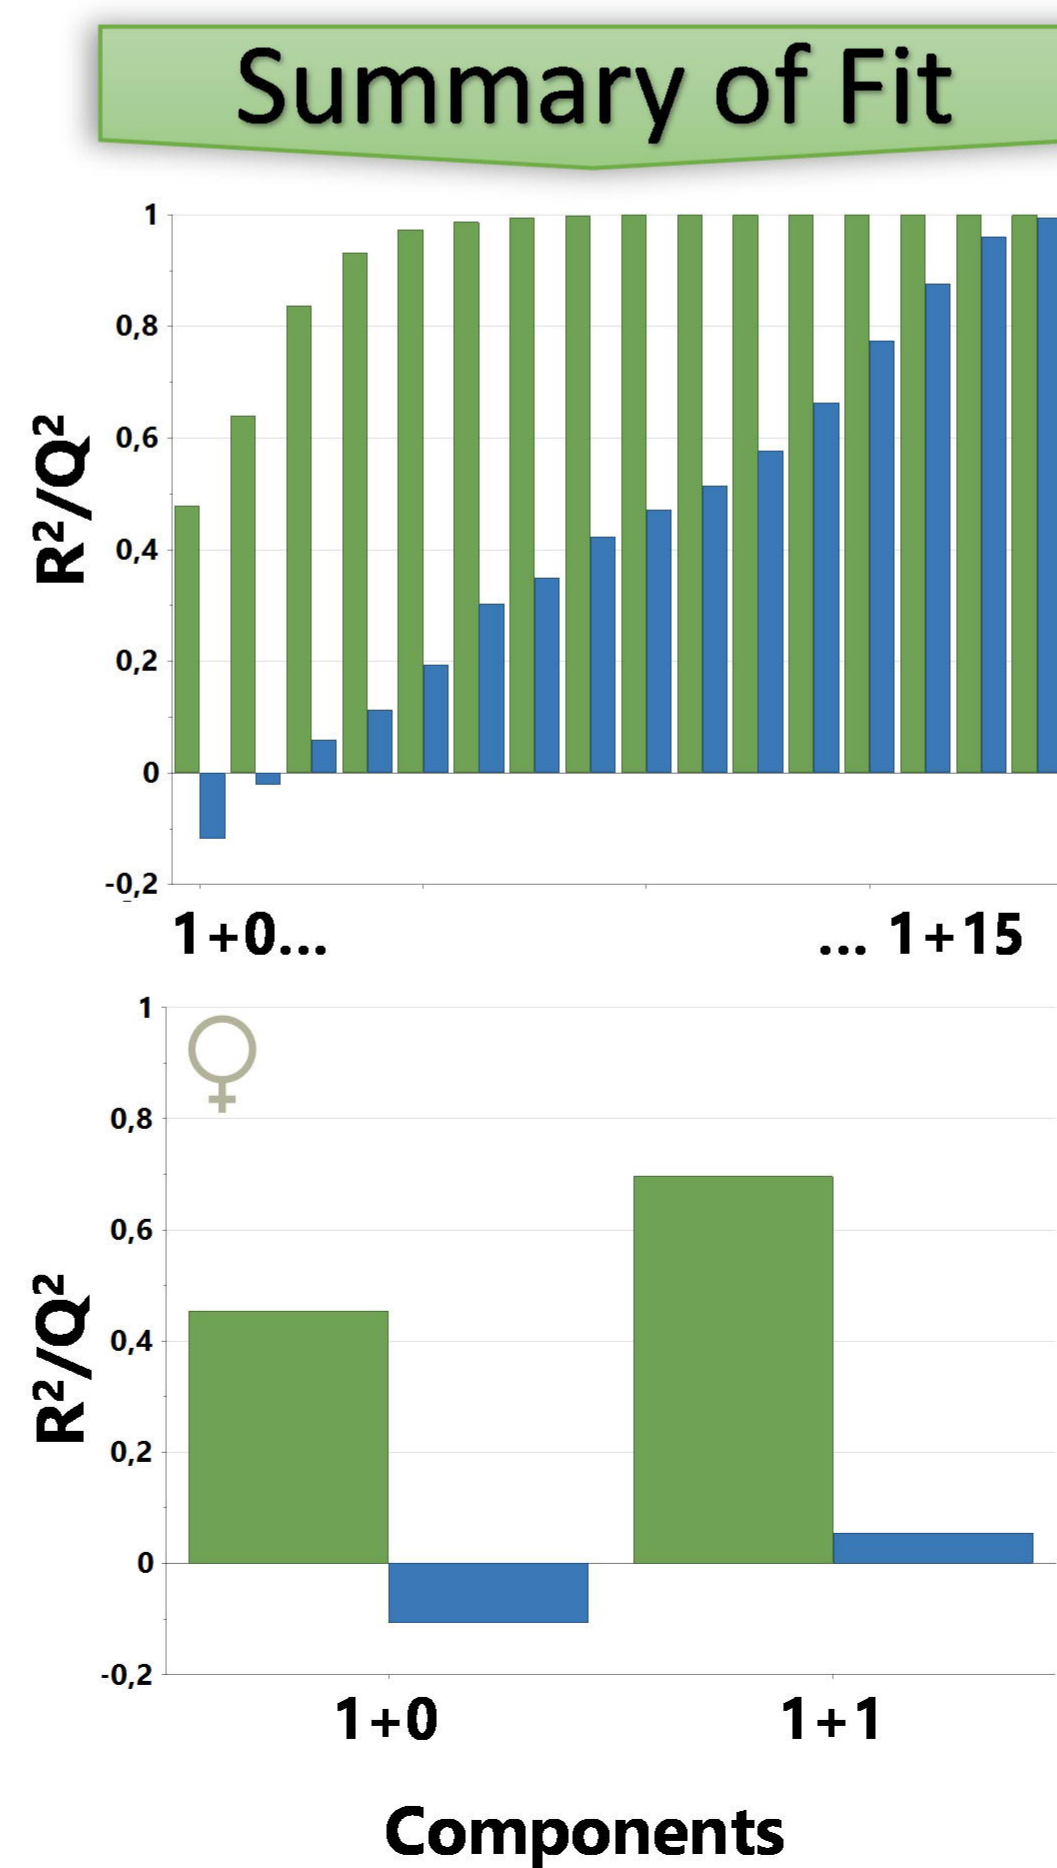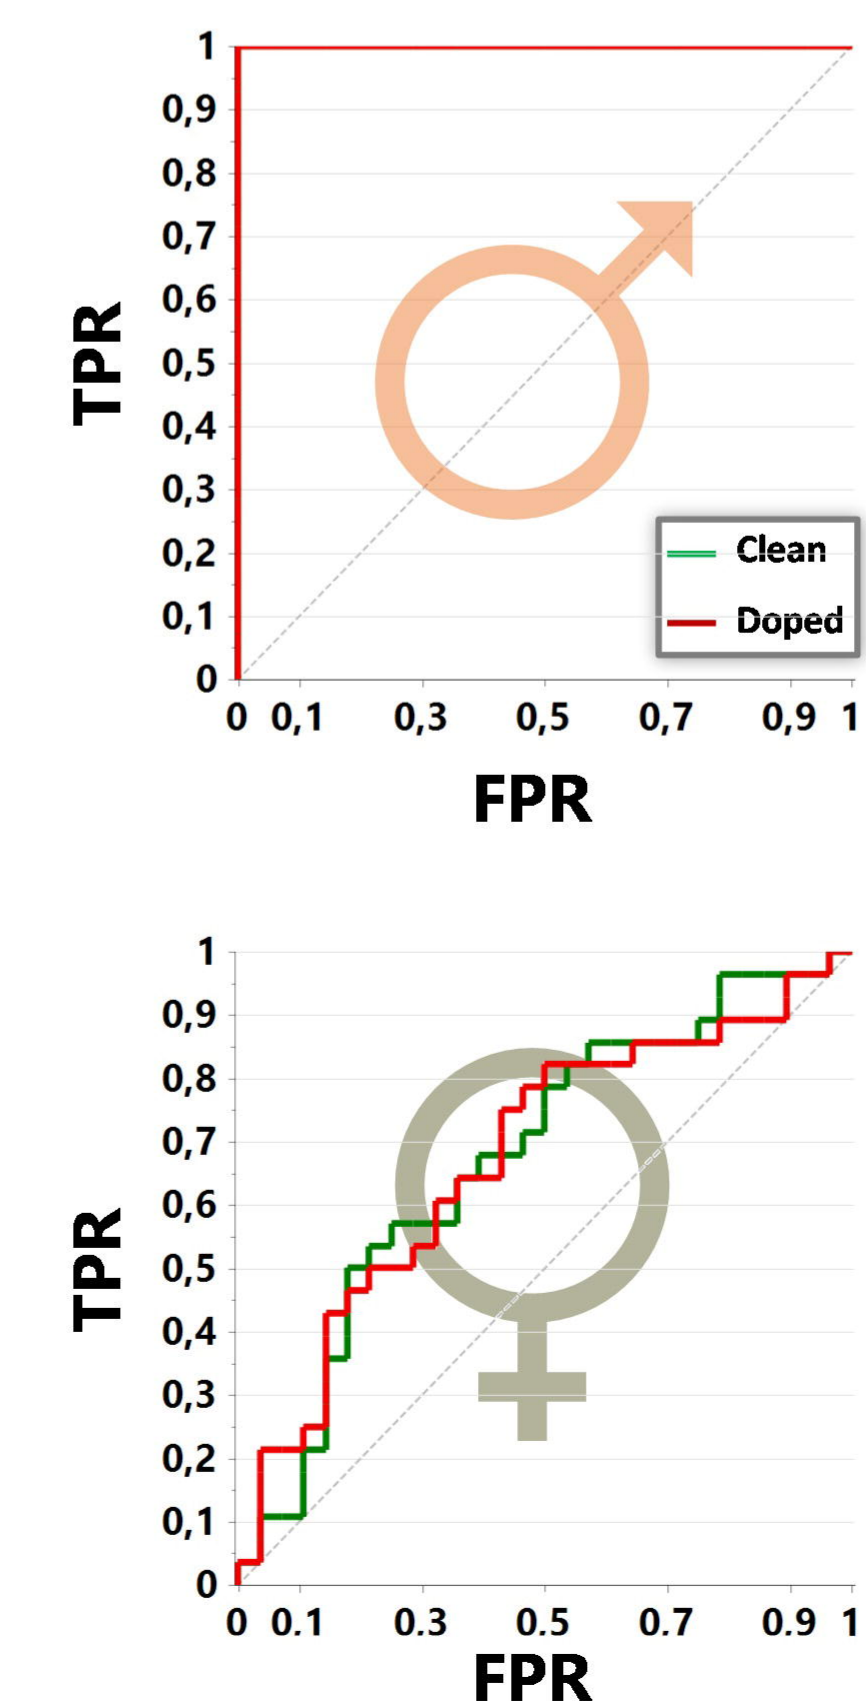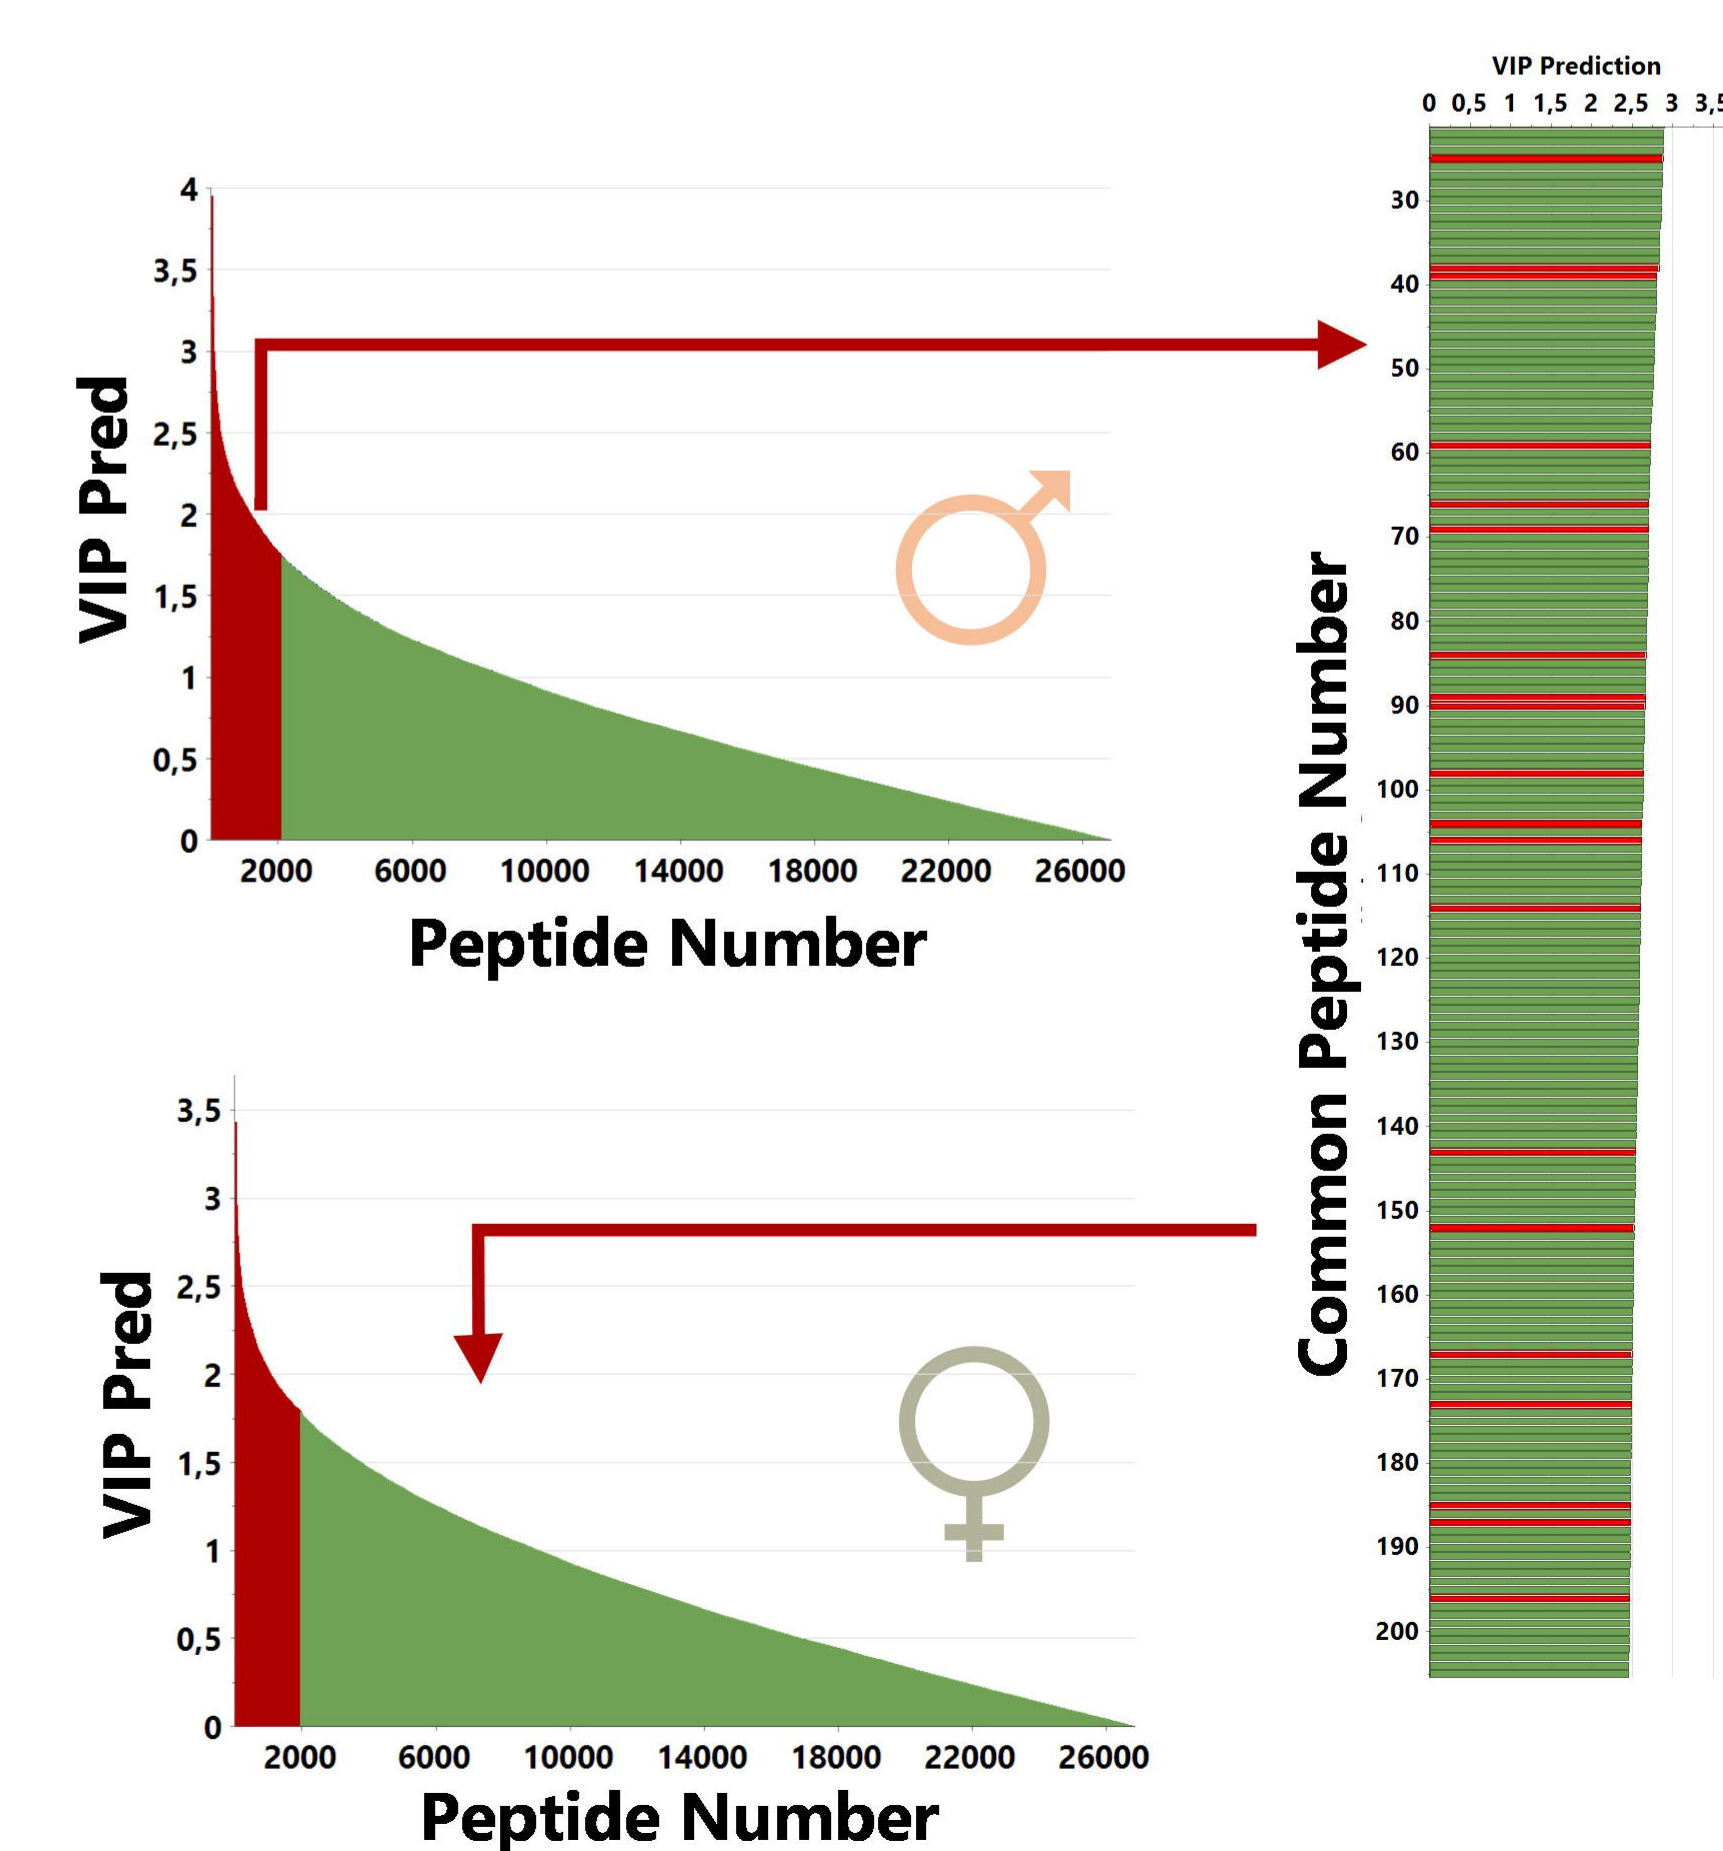

medRxiv preprint doi: <https://doi.org/10.1101/2020.07.04.20146217>; this version posted July 6, 2020. The copyright holder for this preprint (which was not certified by peer review) is the author/funder, who has granted medRxiv a license to display the preprint in perpetuity. It is made available under a CC-BY-NC-ND 4.0 International license.

PCA

OPLS-DA

Validation

Prediction

Train

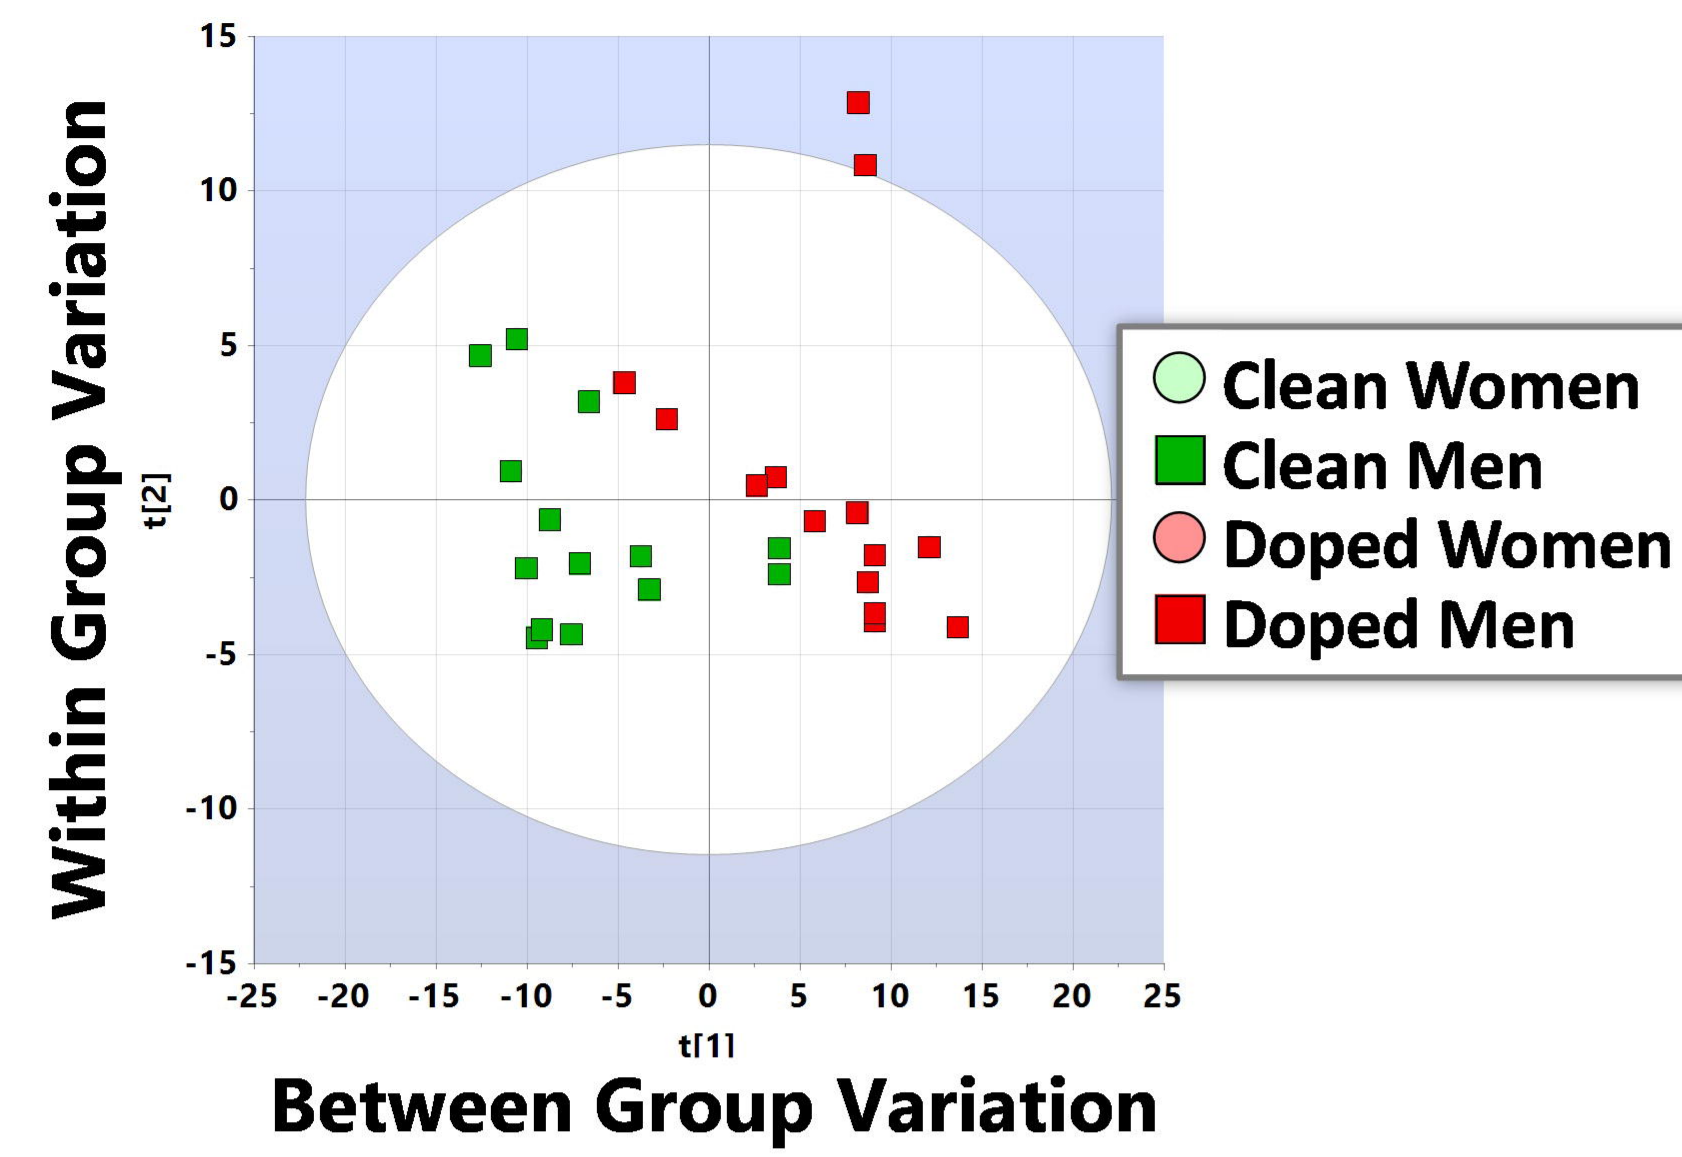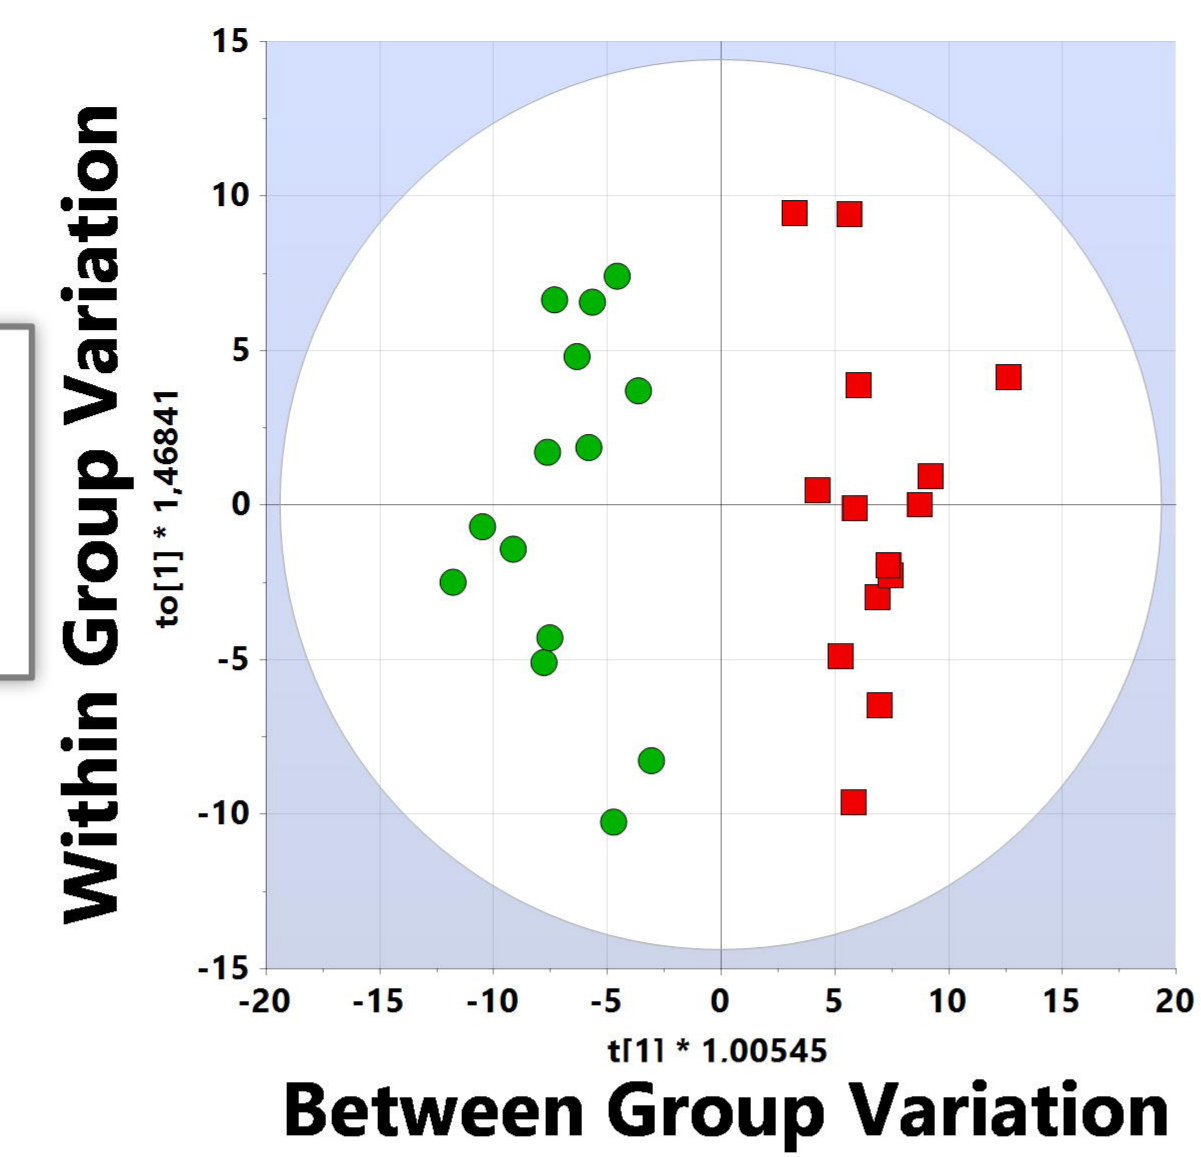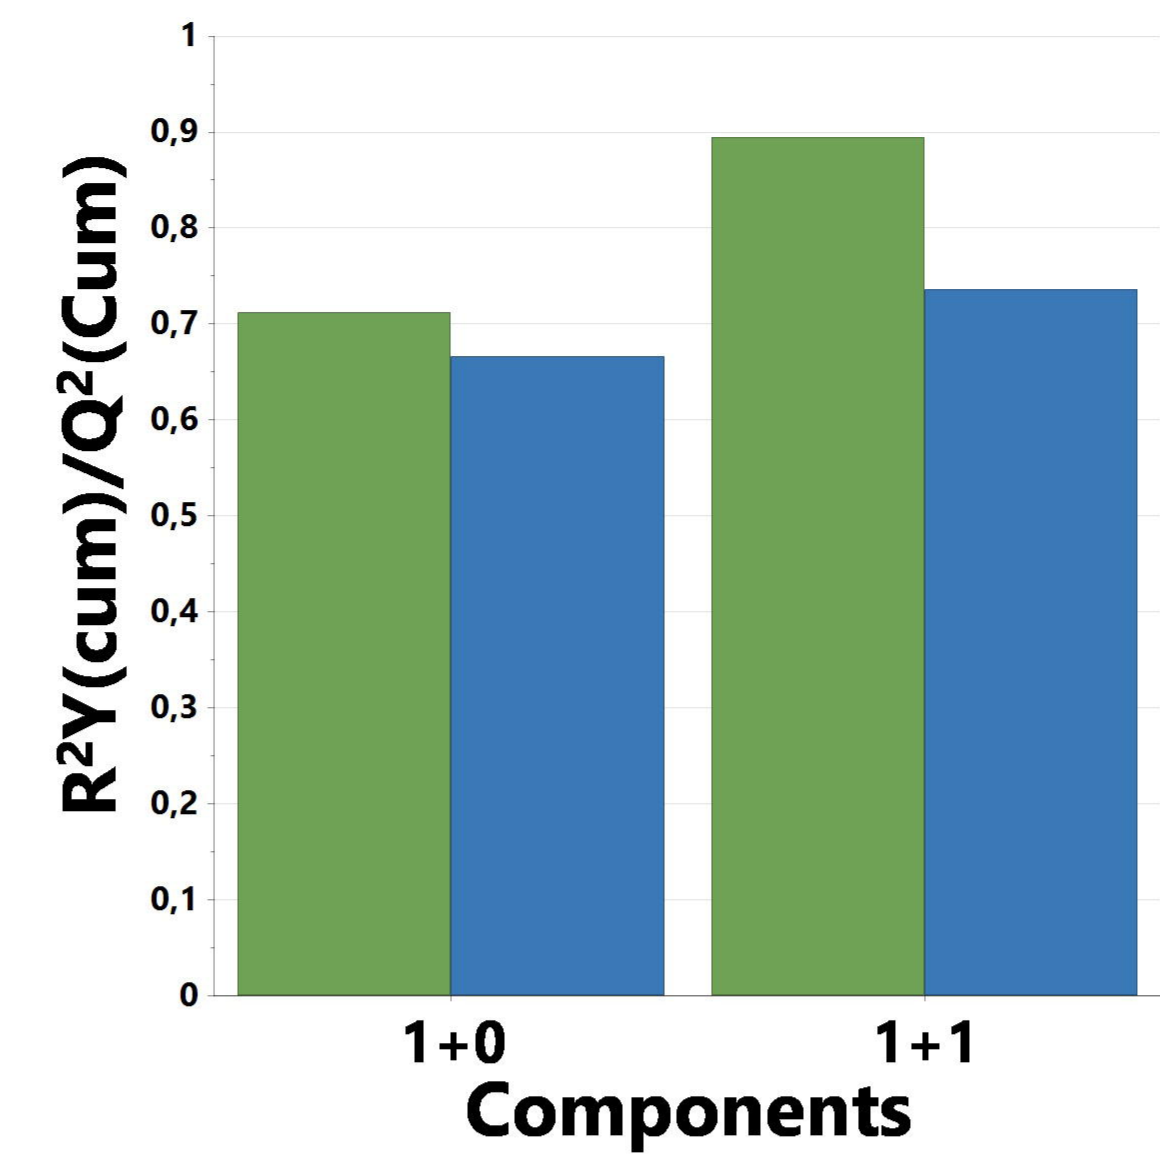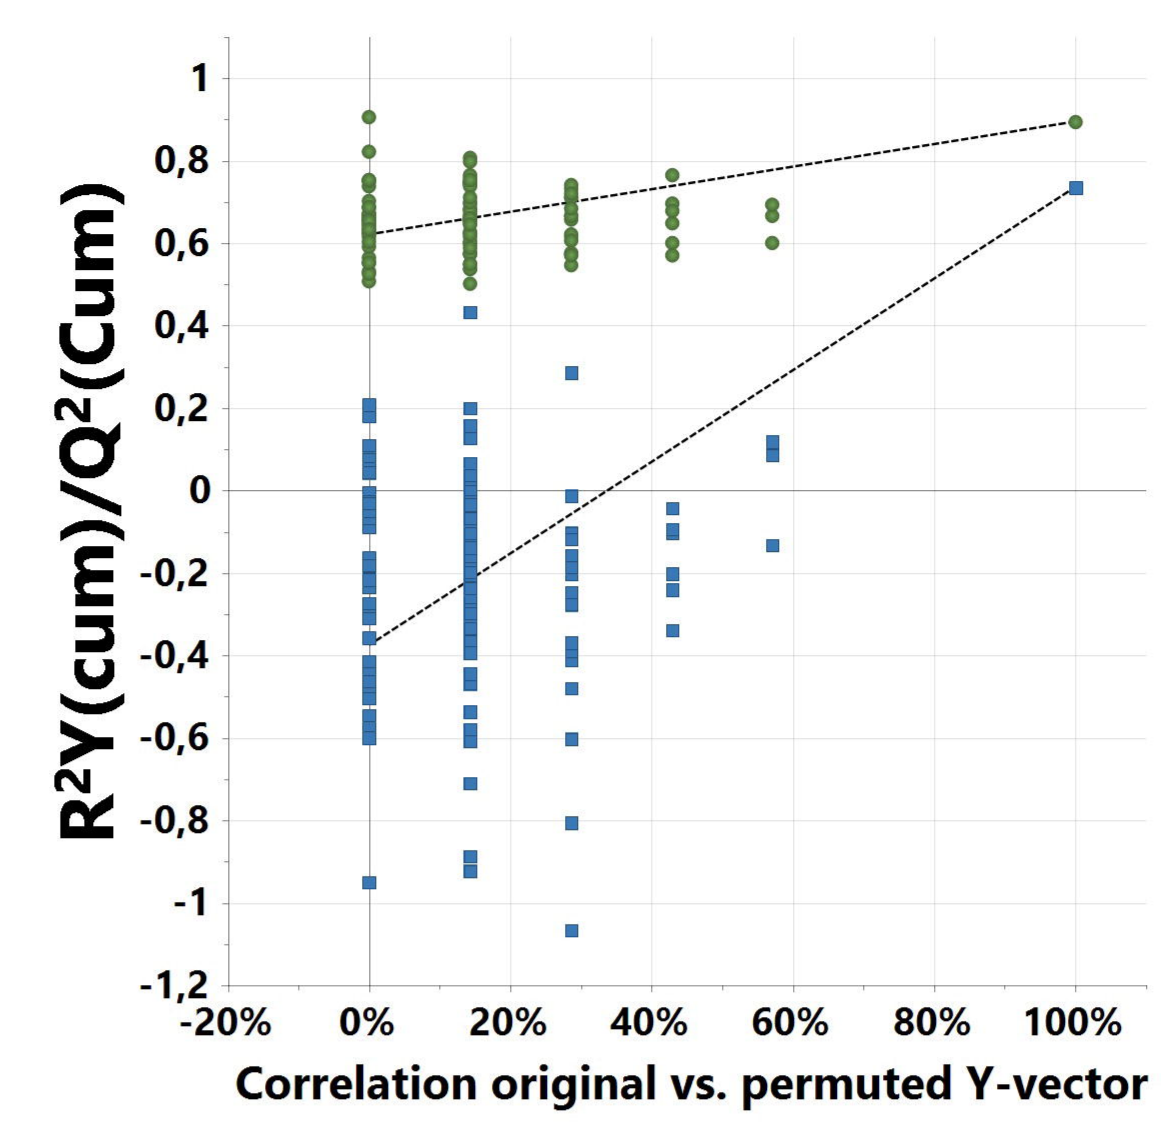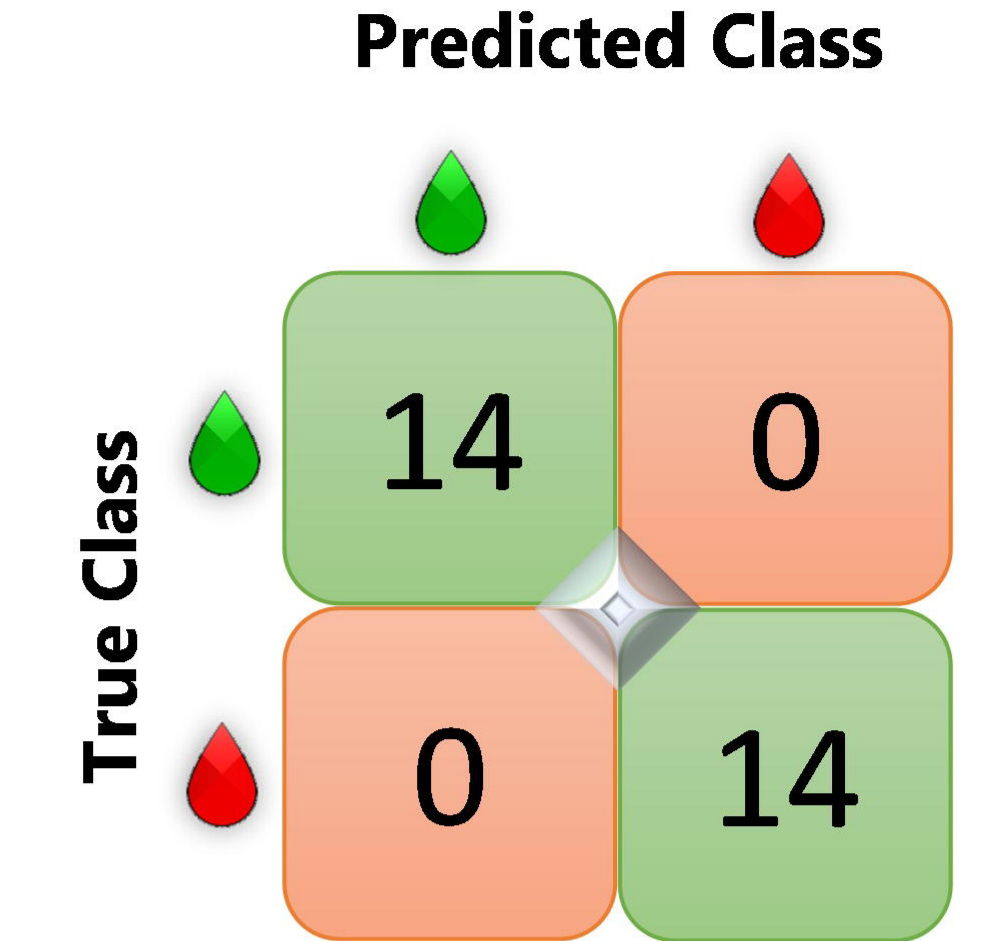

Test

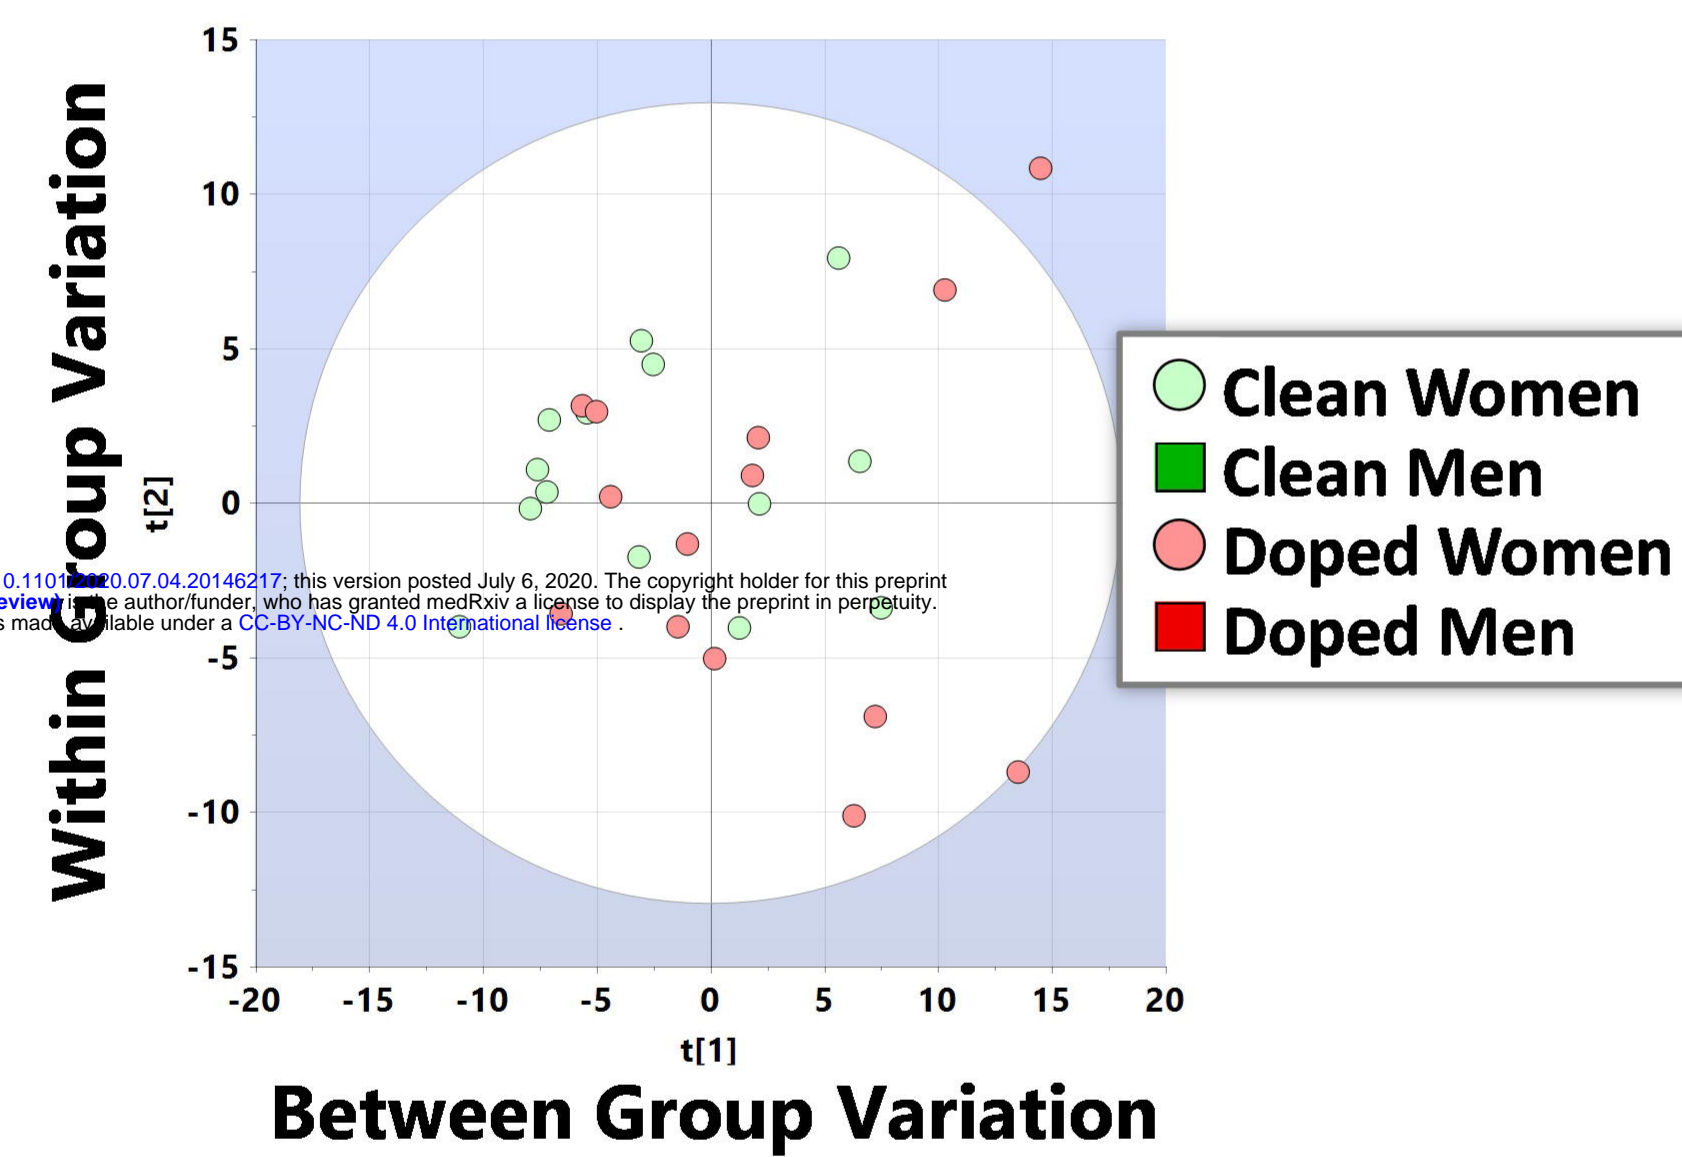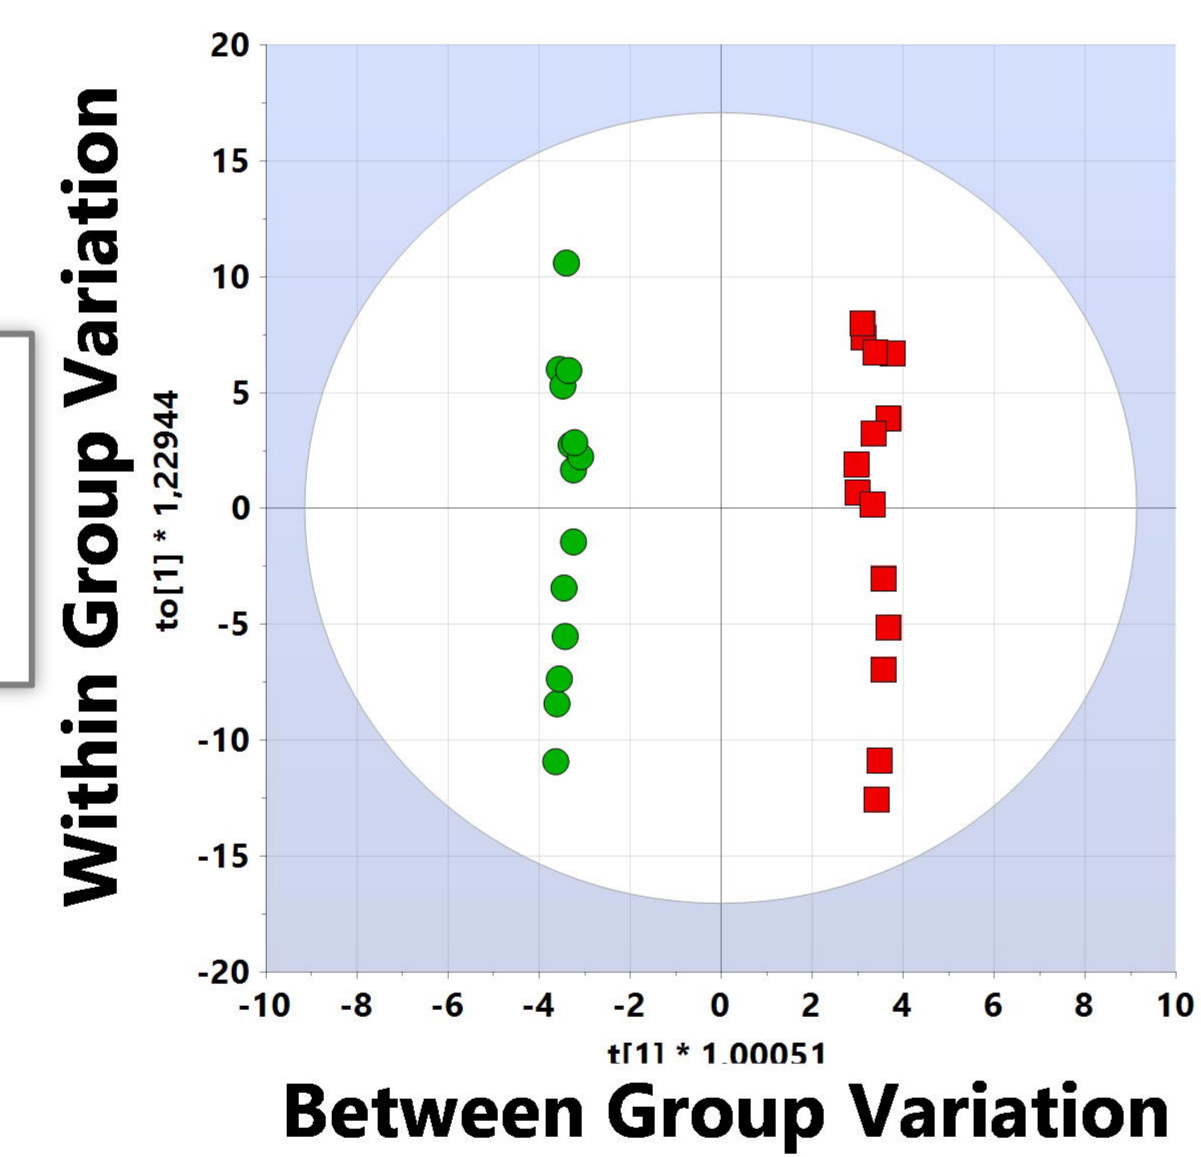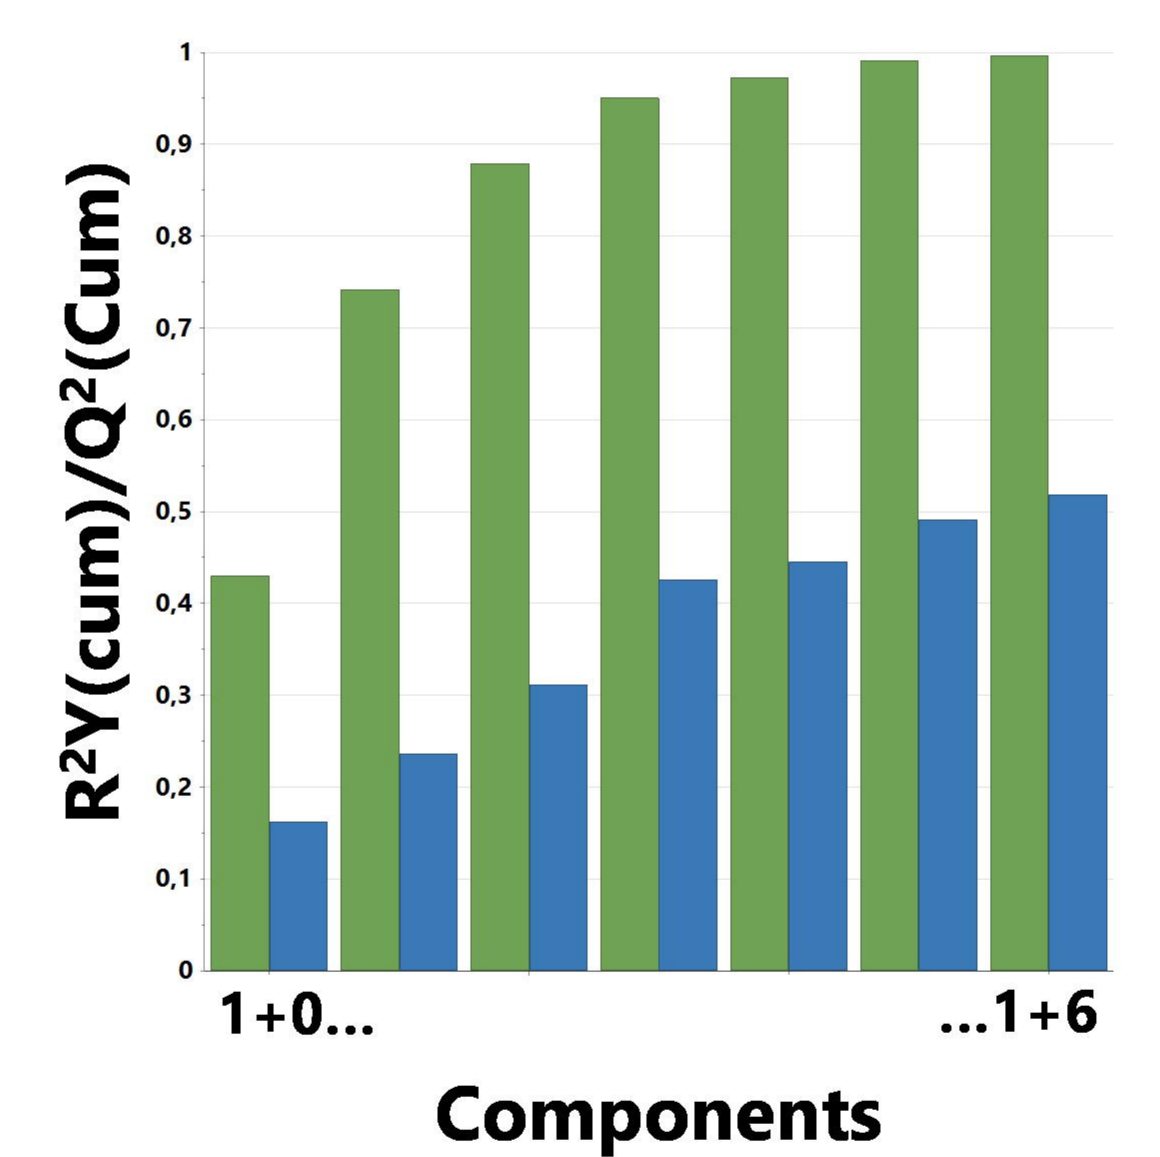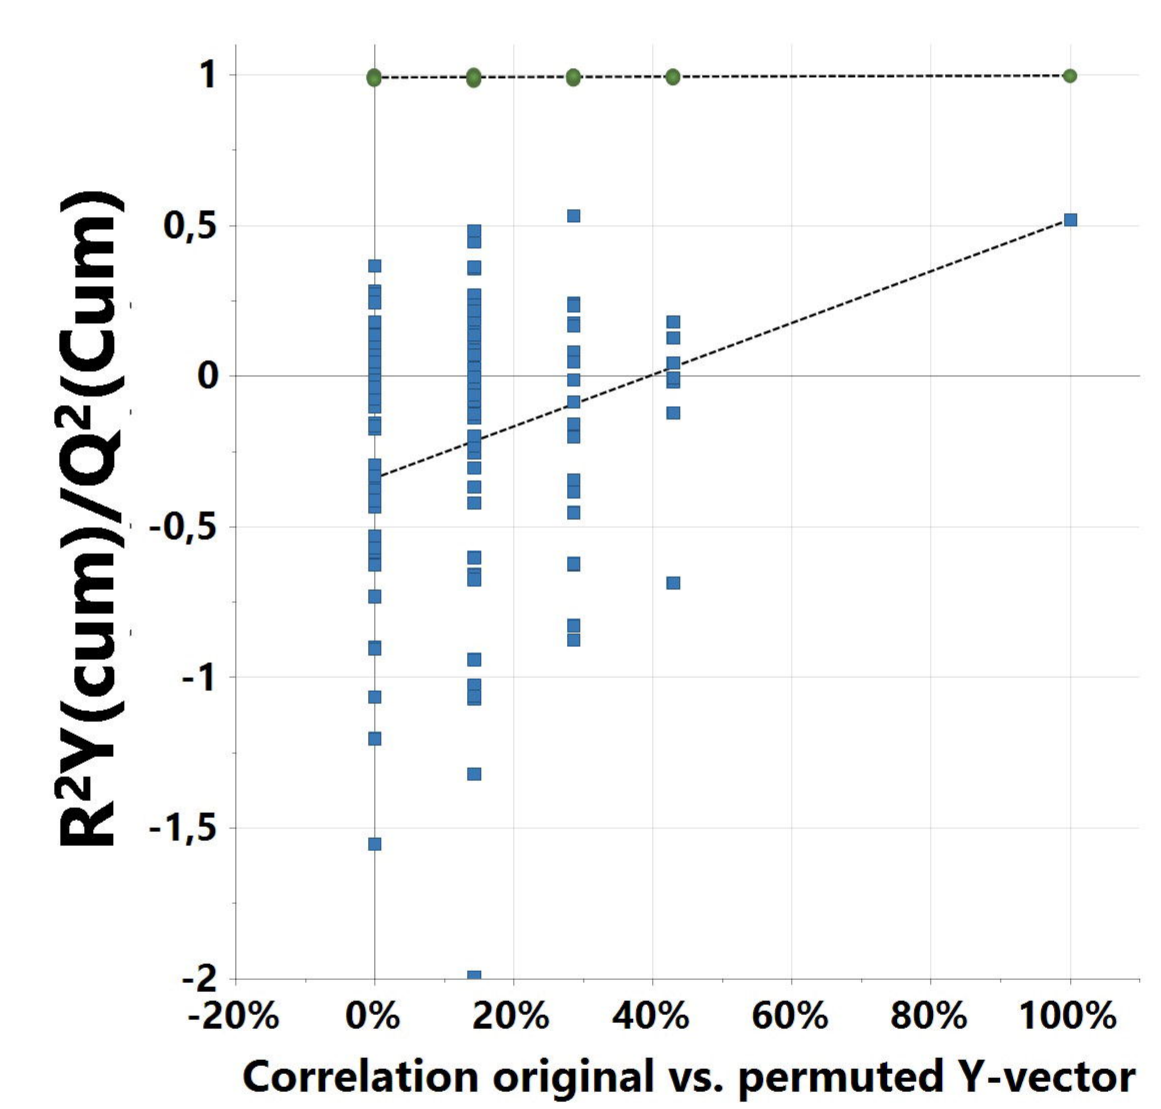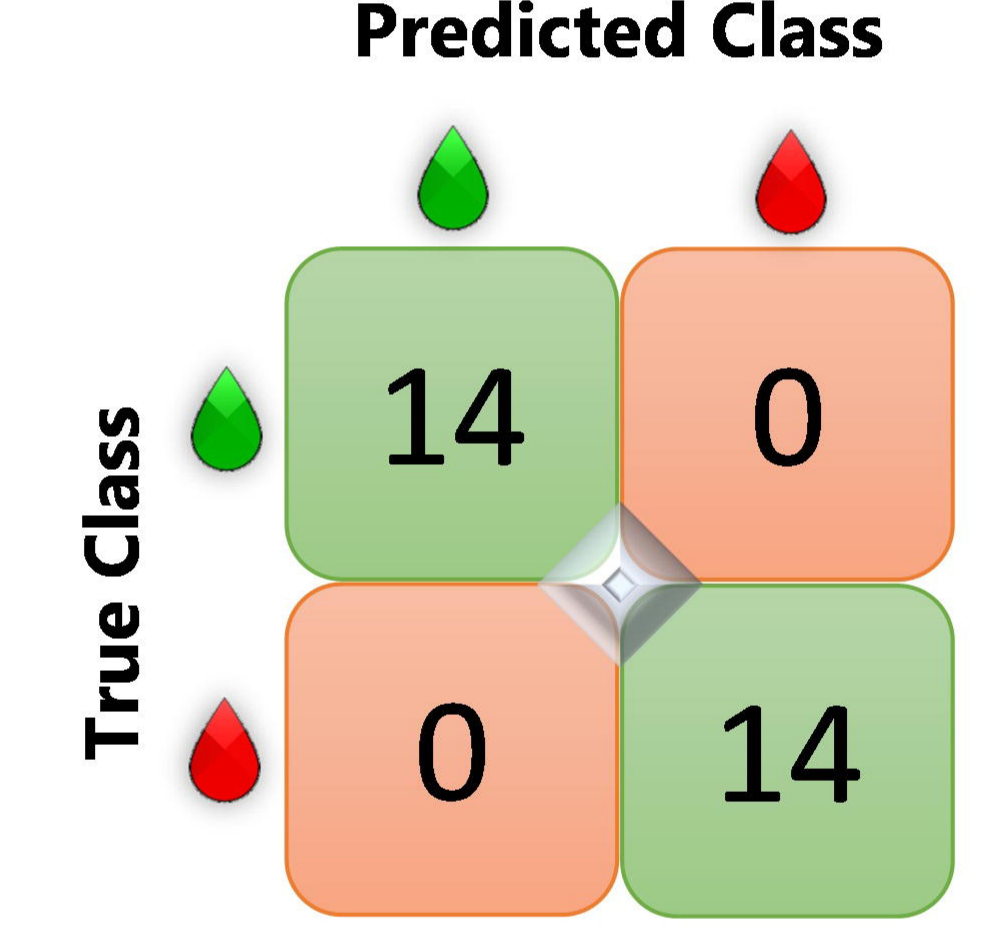

Valid

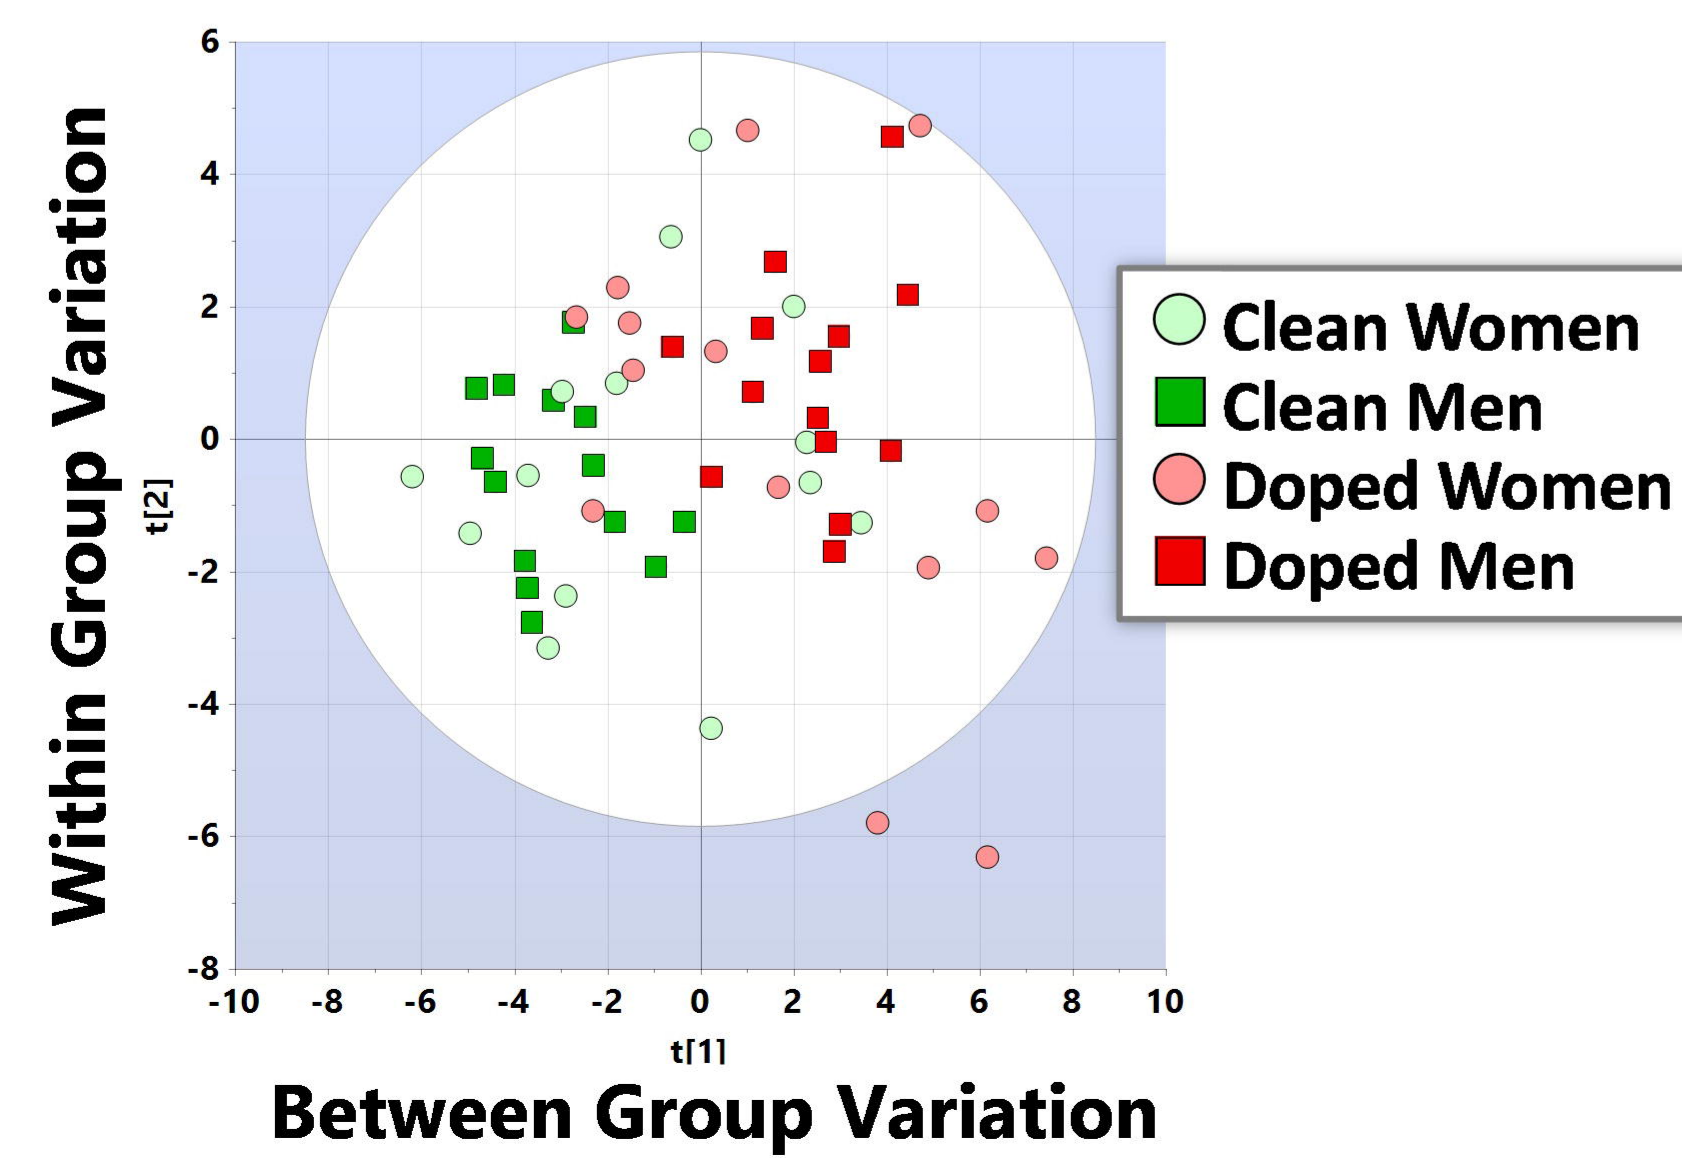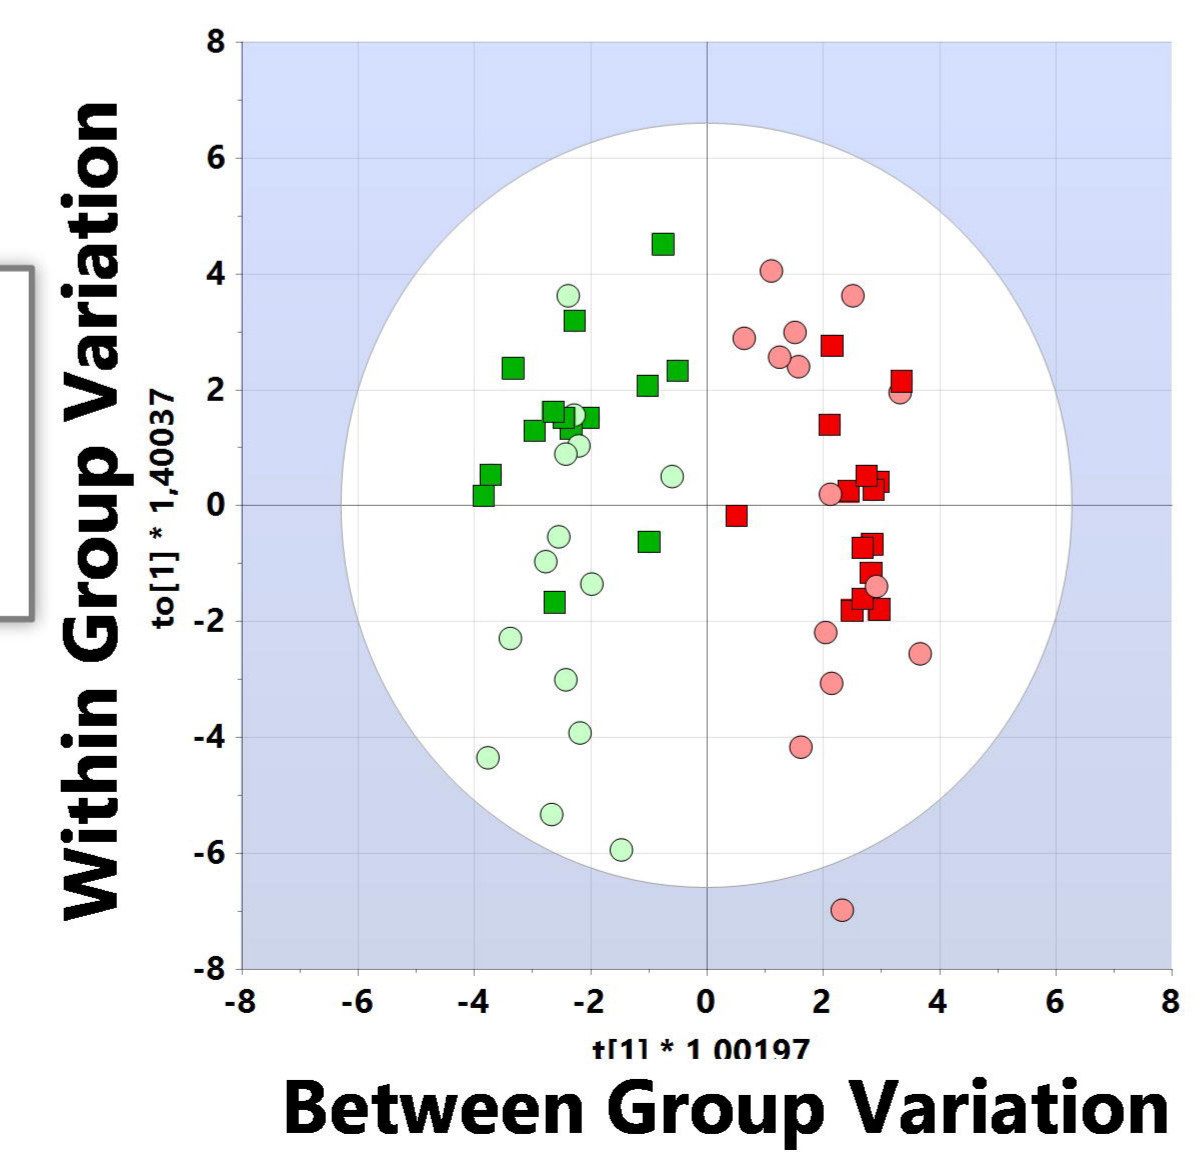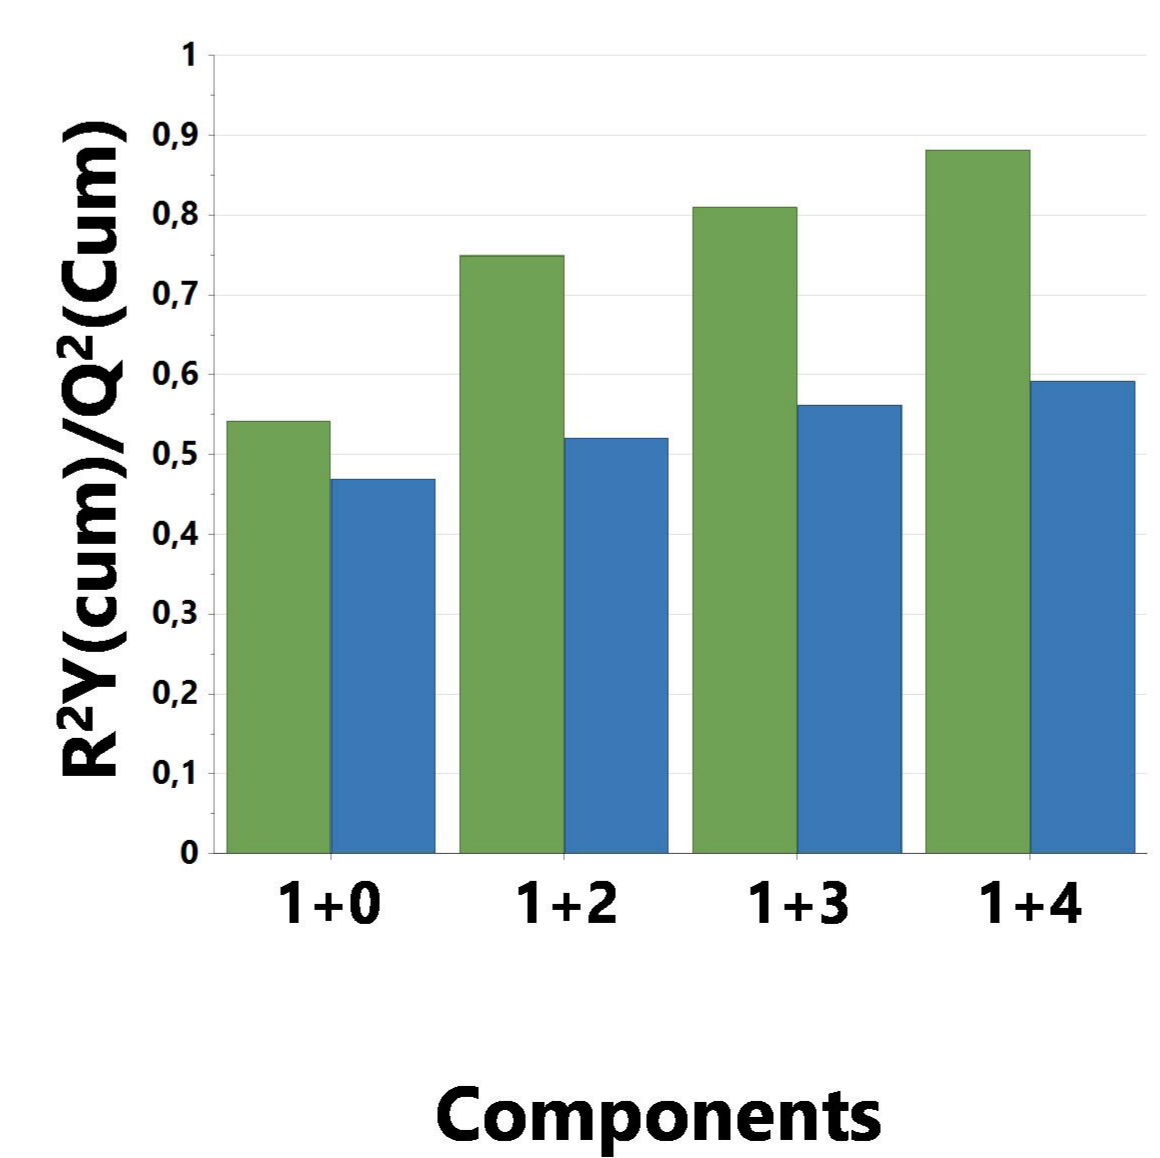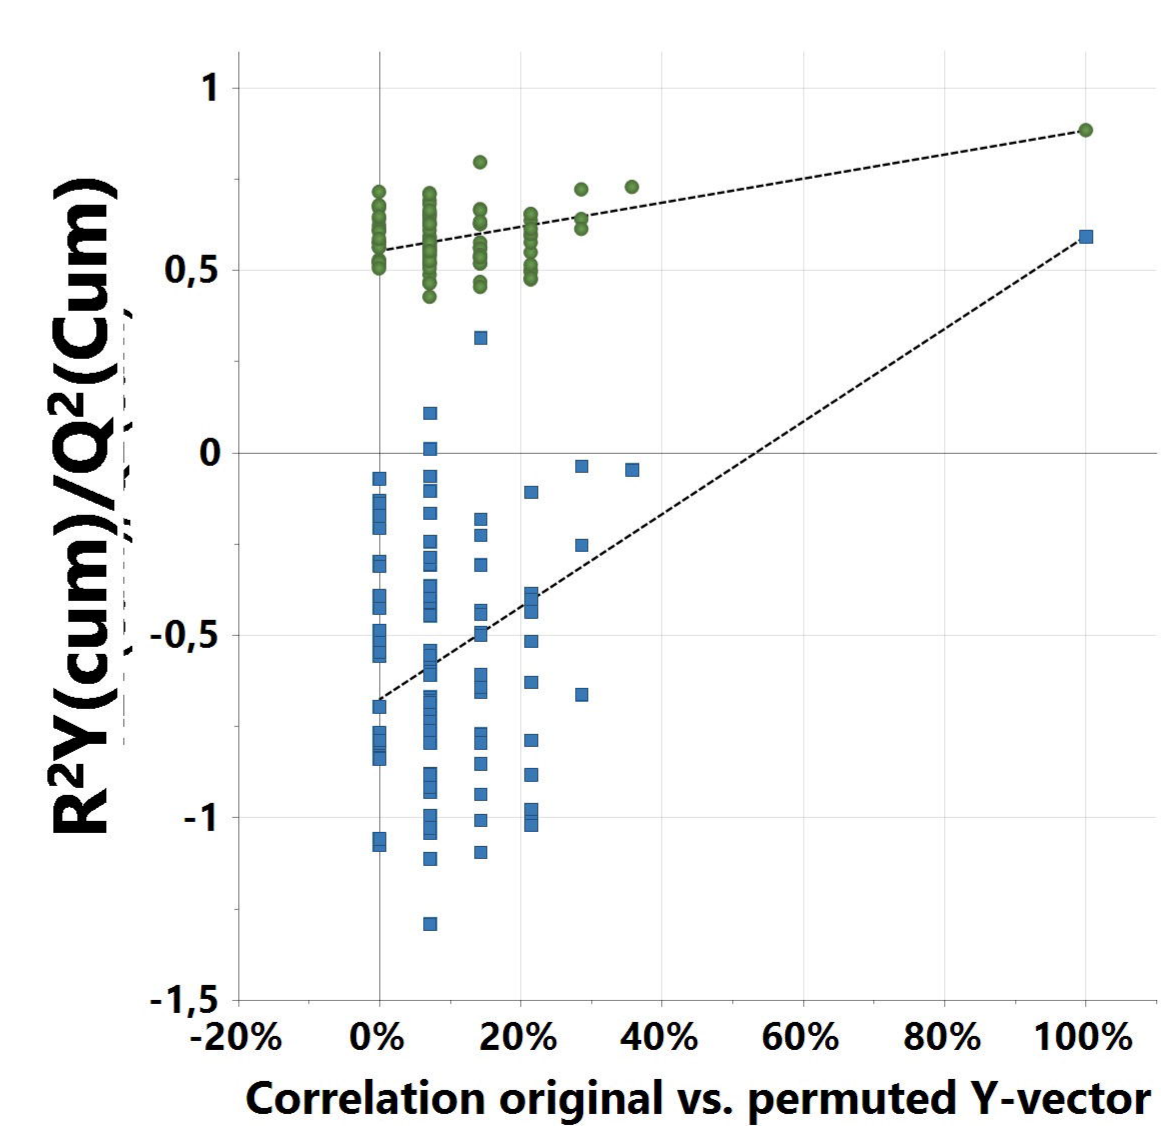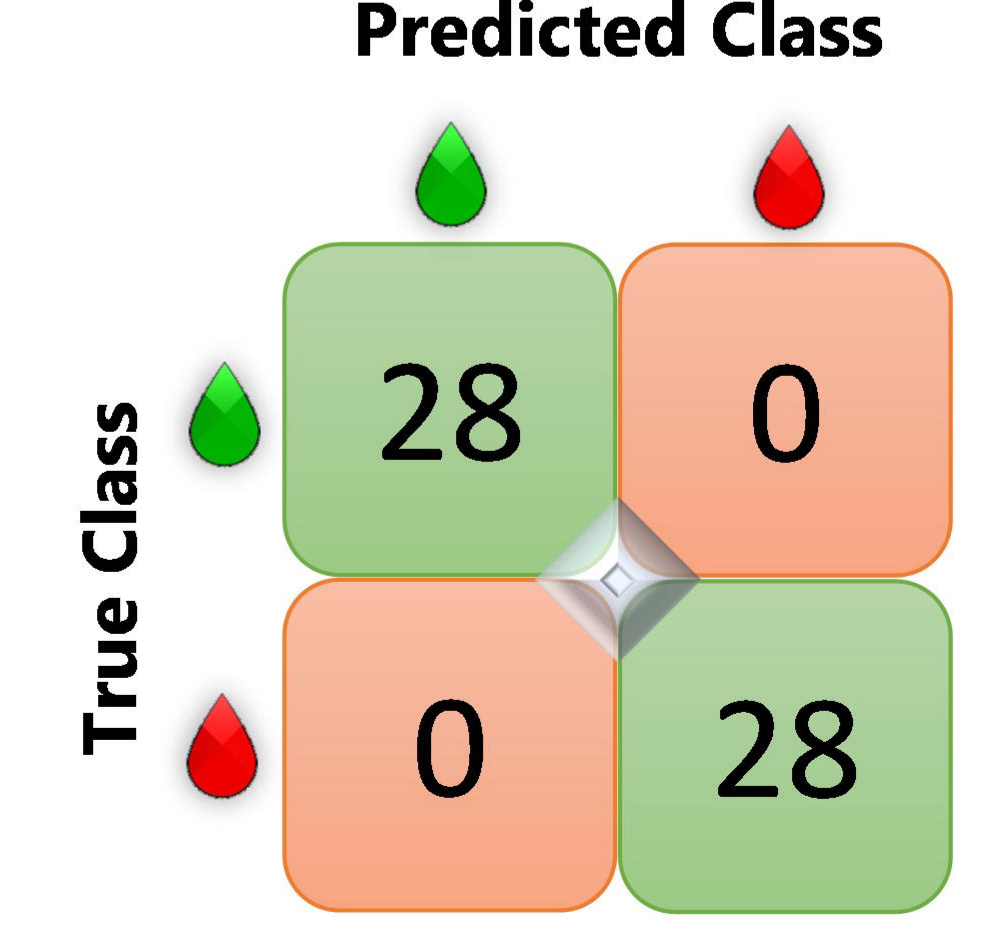

# Combined X-Y covariances

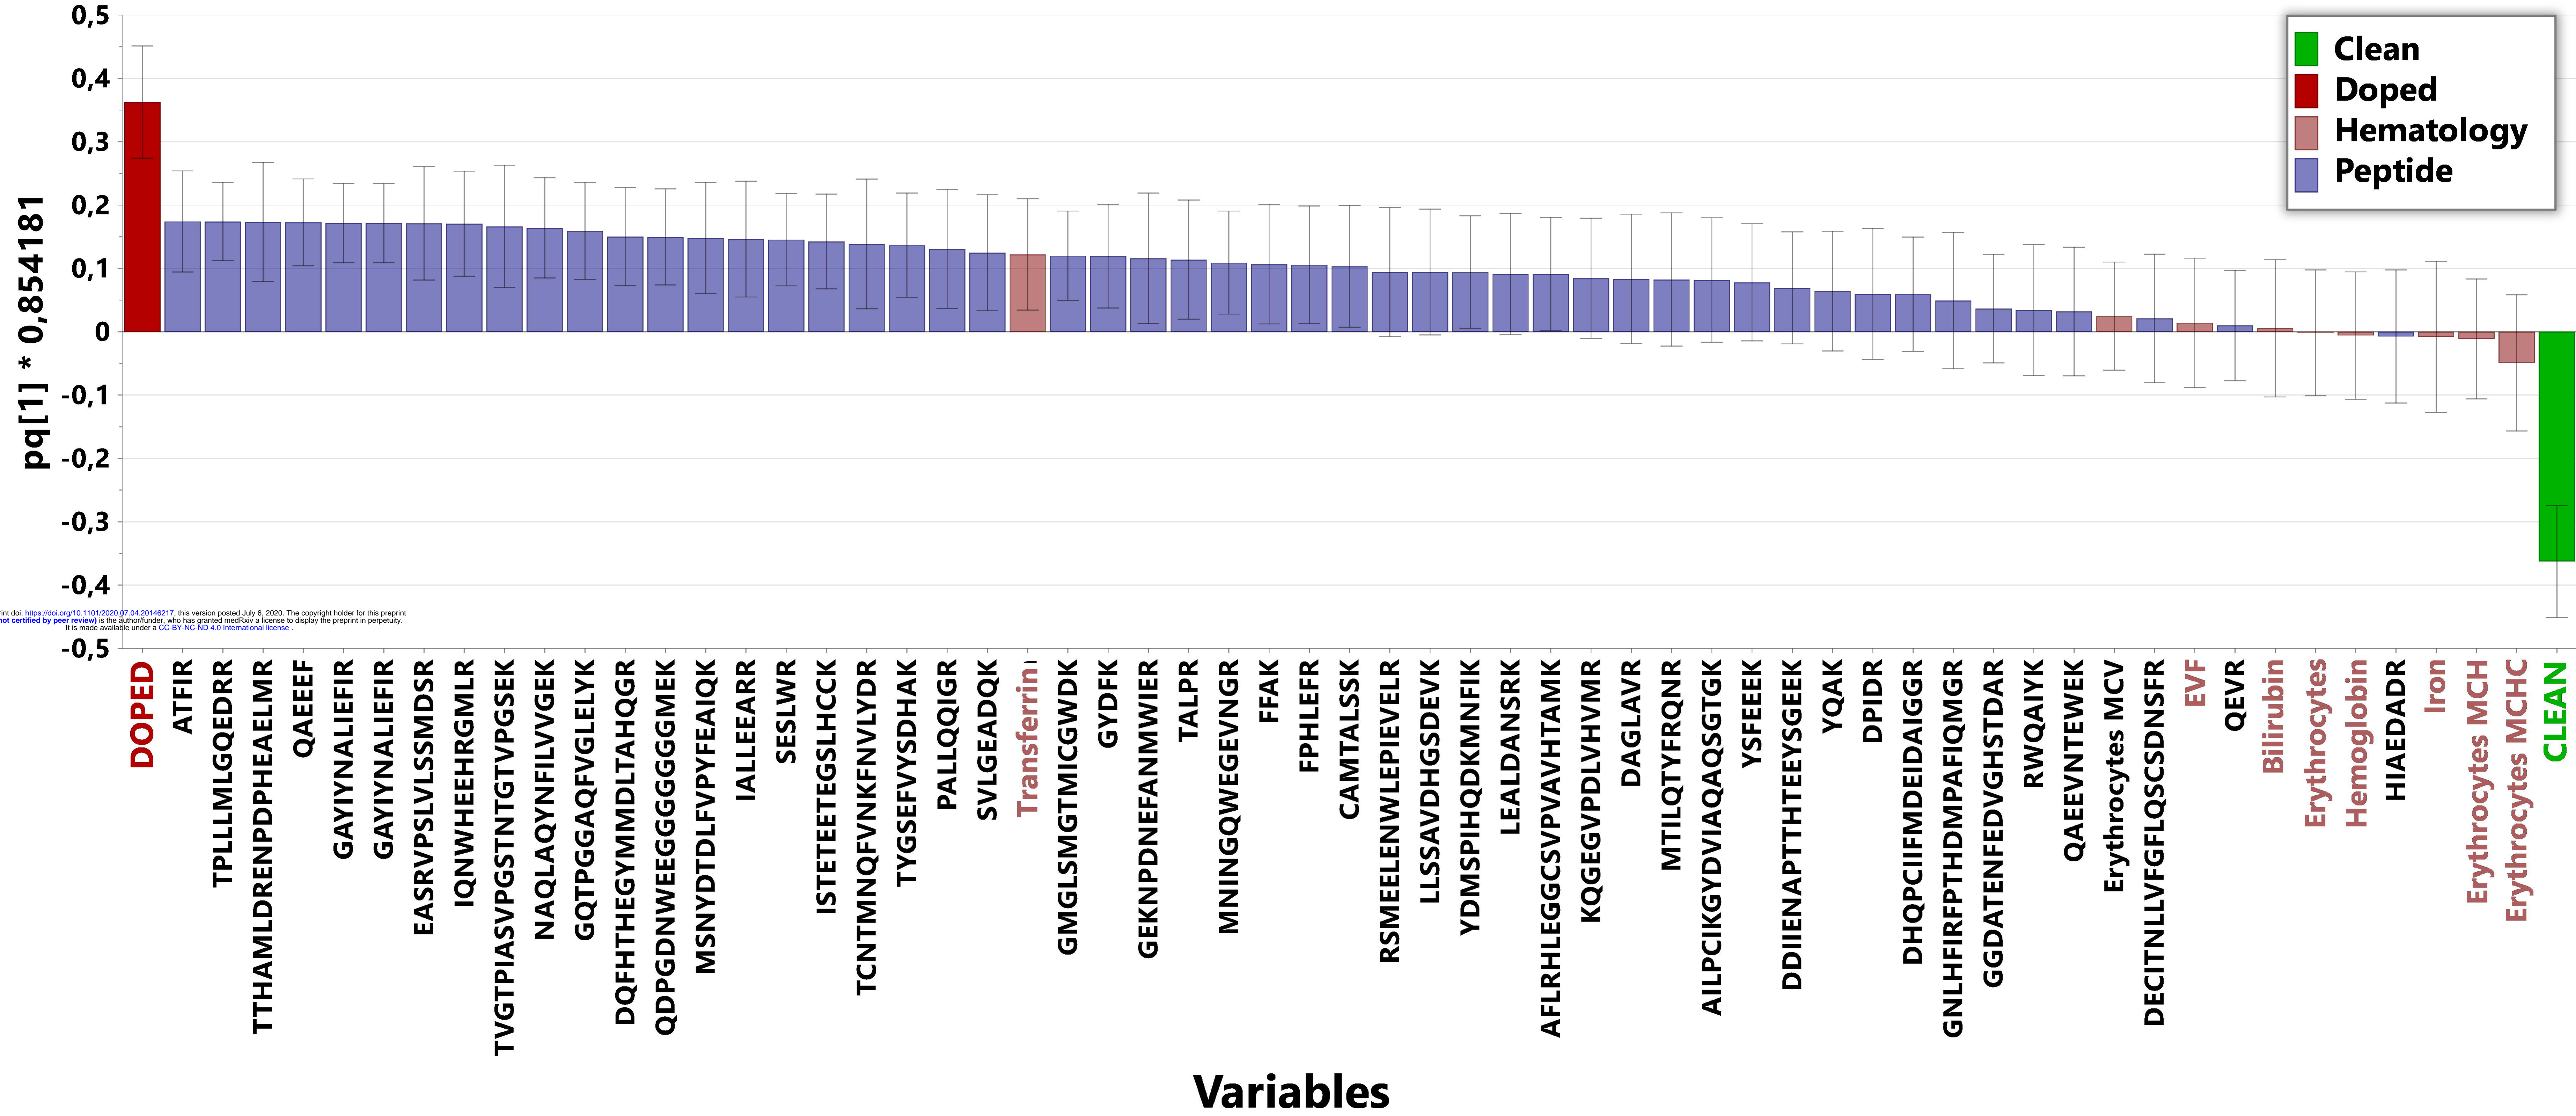

Preprint doi: <https://doi.org/10.1101/2020.07.04.20146217>; this version posted July 6, 2020. The copyright holder for this preprint (which was not certified by peer review) is the author/funder, who has granted medRxiv a license to display the preprint in perpetuity. It is made available under a CC-BY-NC-ND 4.0 International license.

# Peptides from Blood Transfusion Bags for Doping Detection

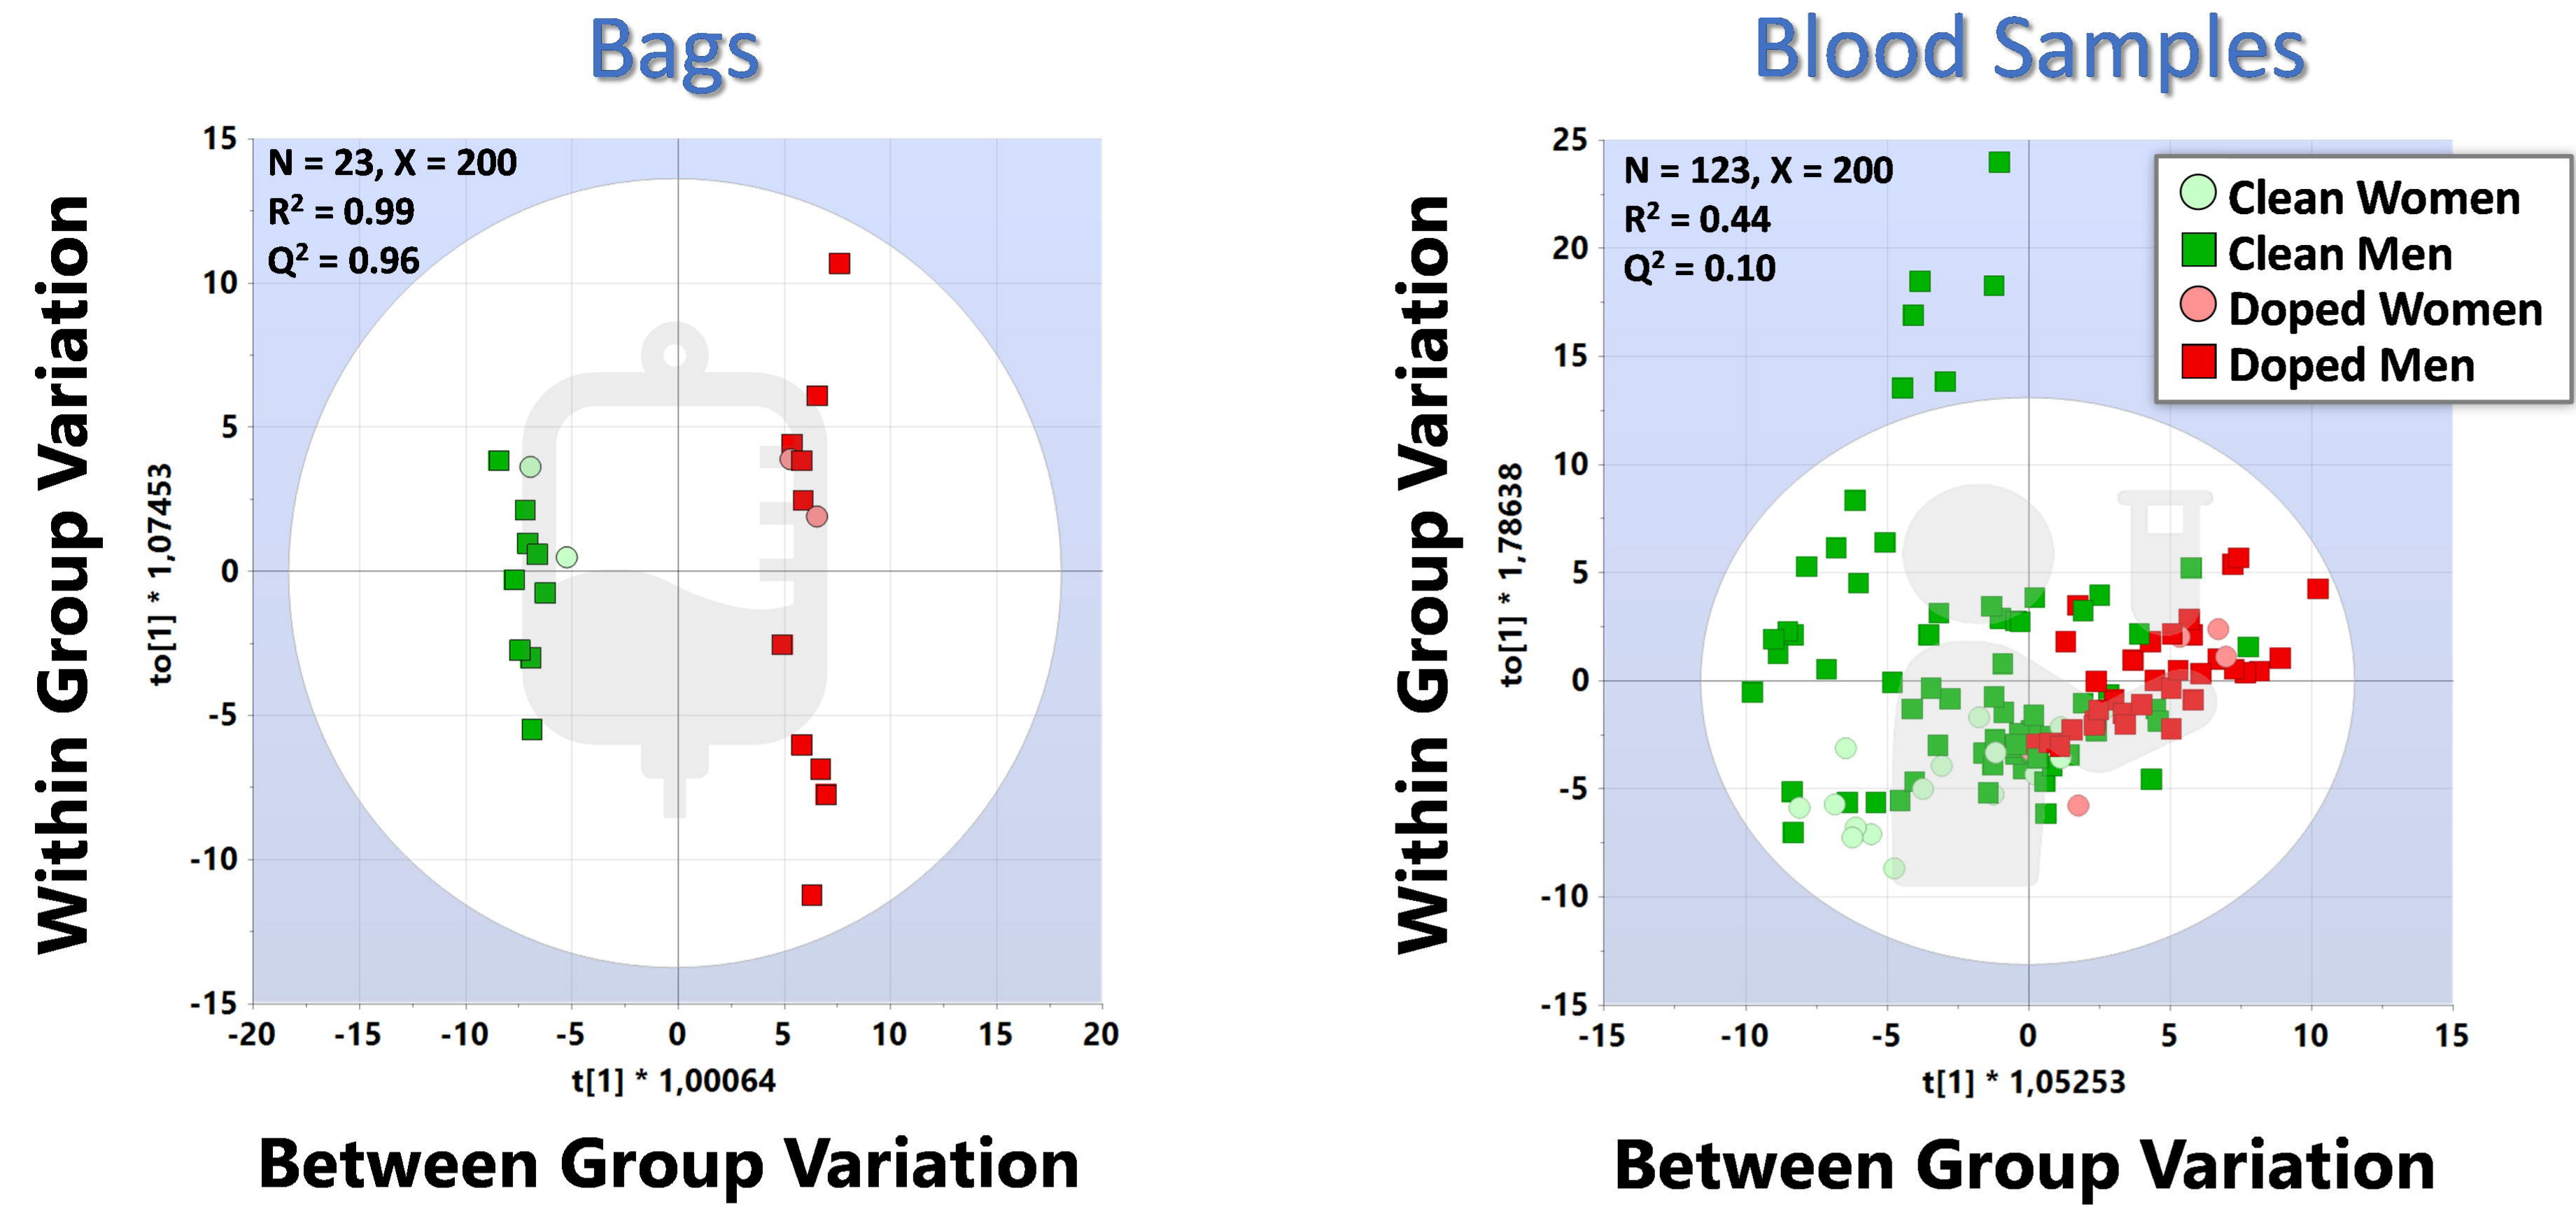

# No Bias for High Altitude

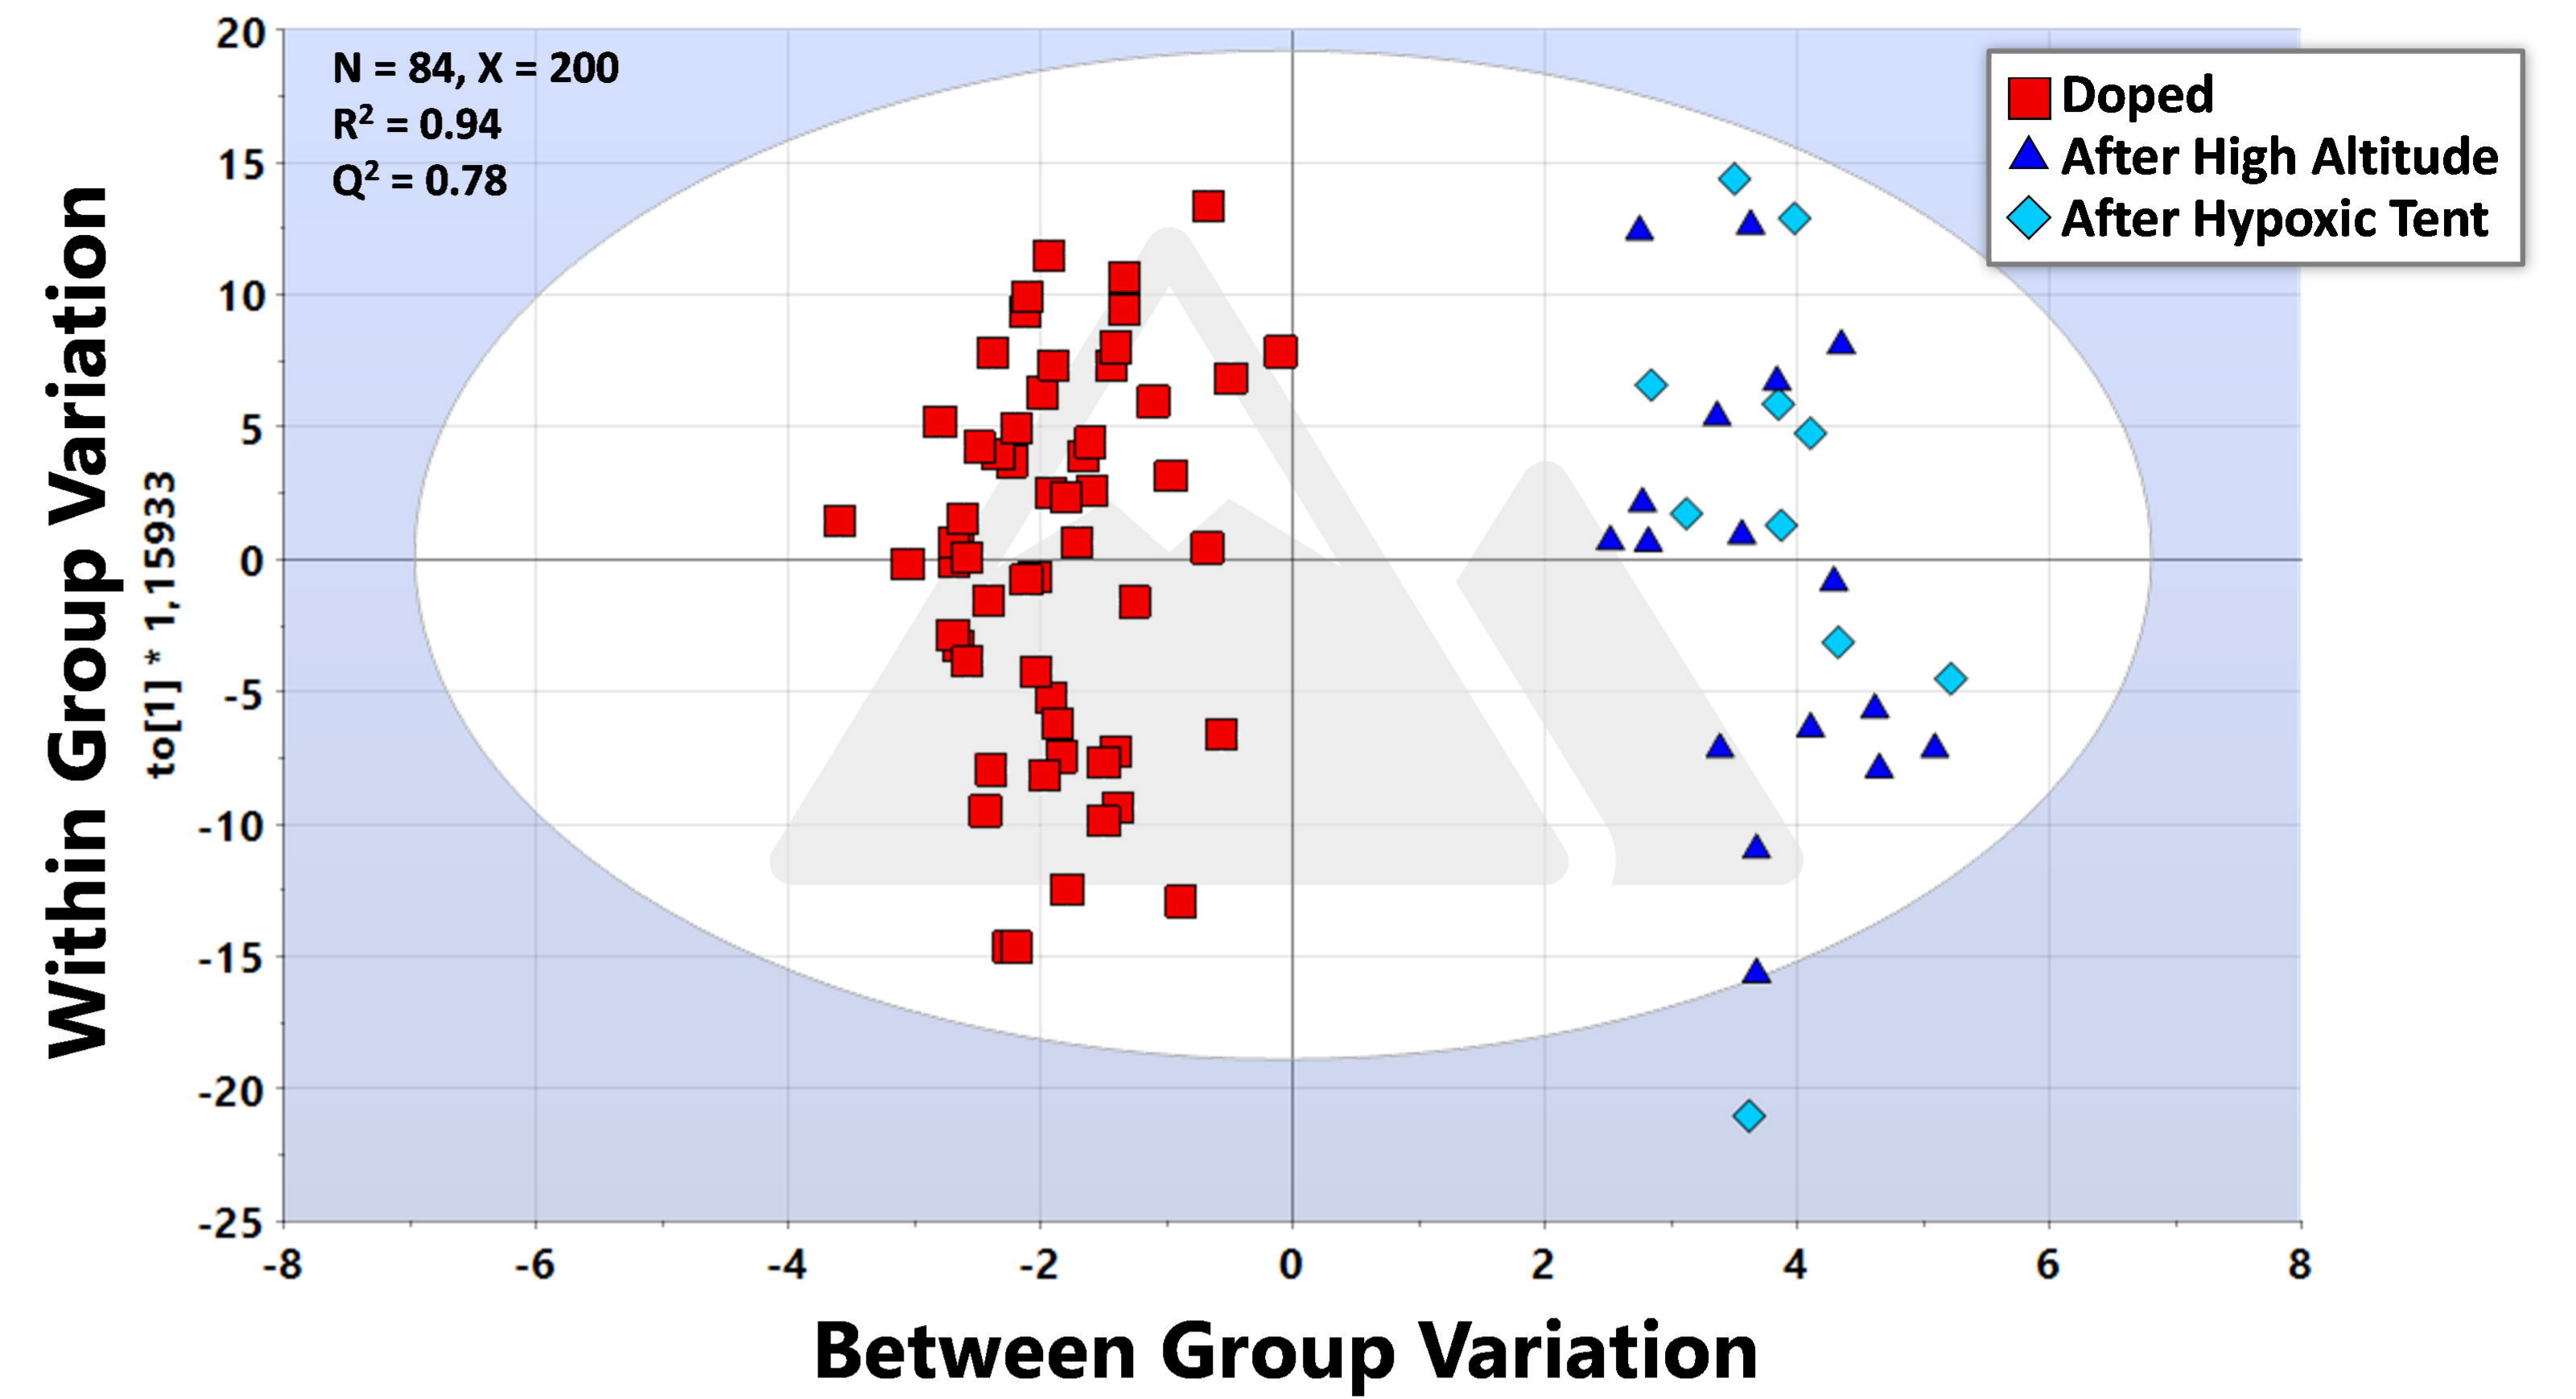

# No Bias for Elite Endurance Training

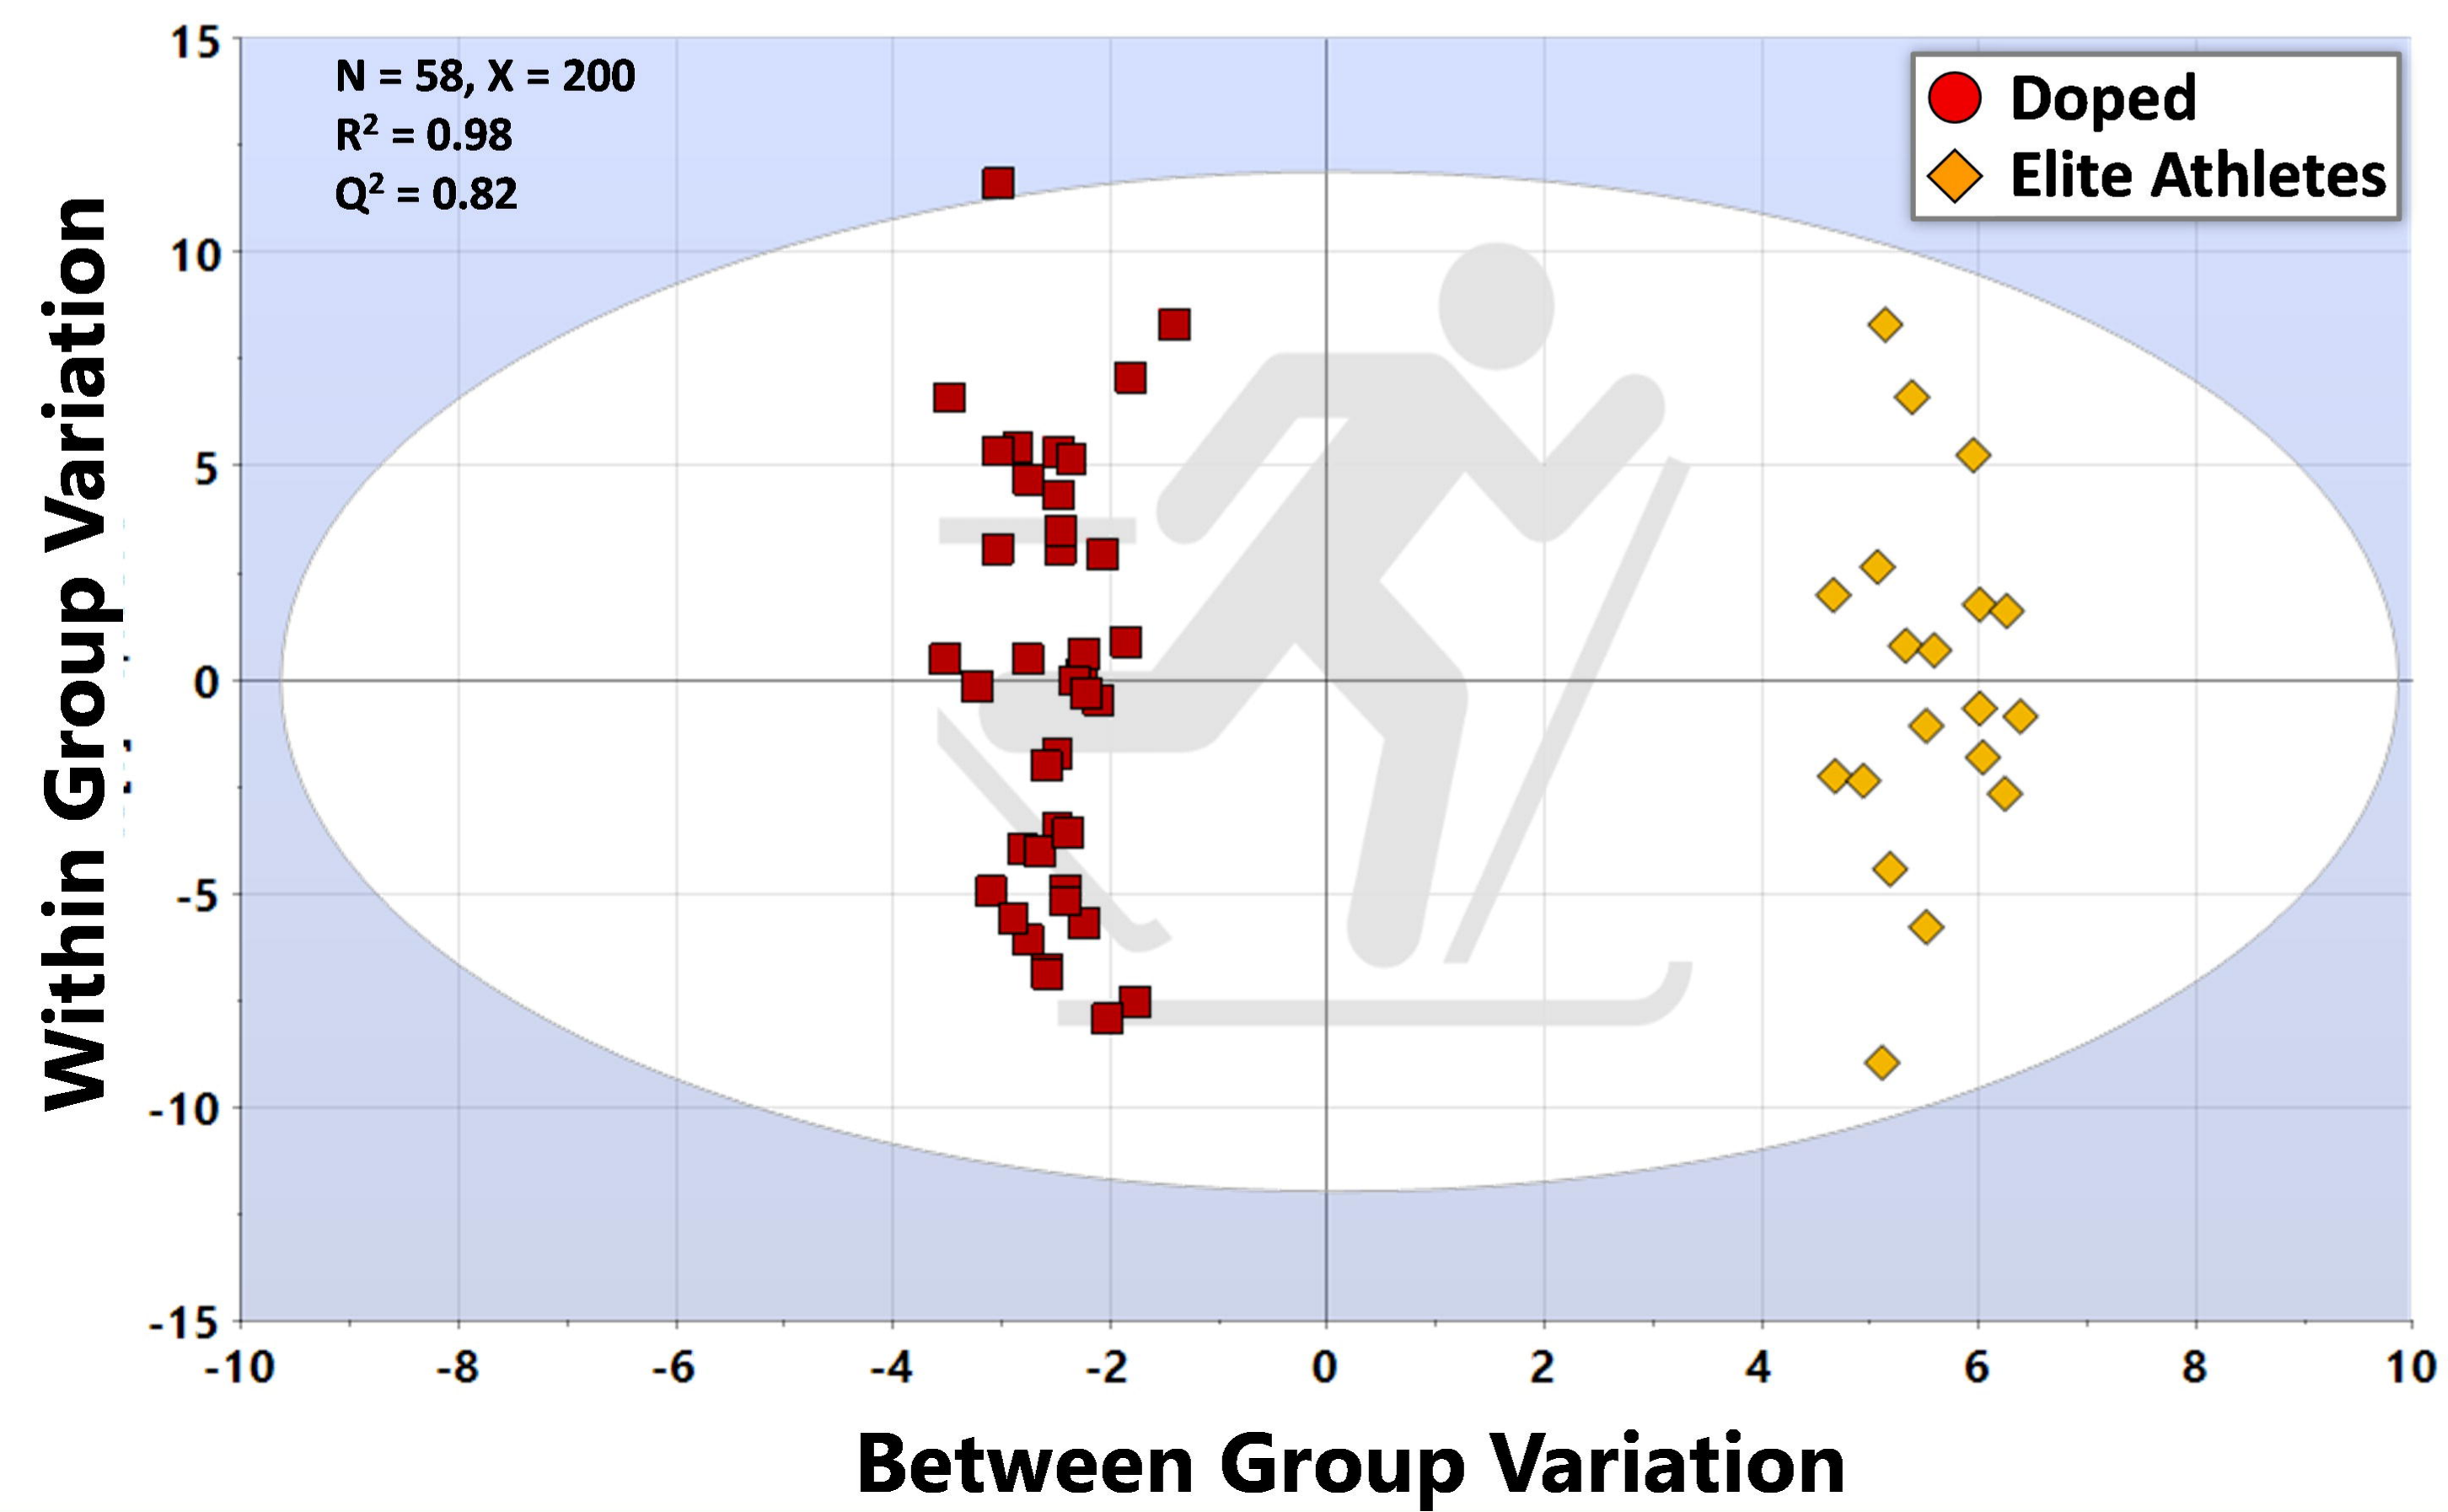

# Summary of Confounders

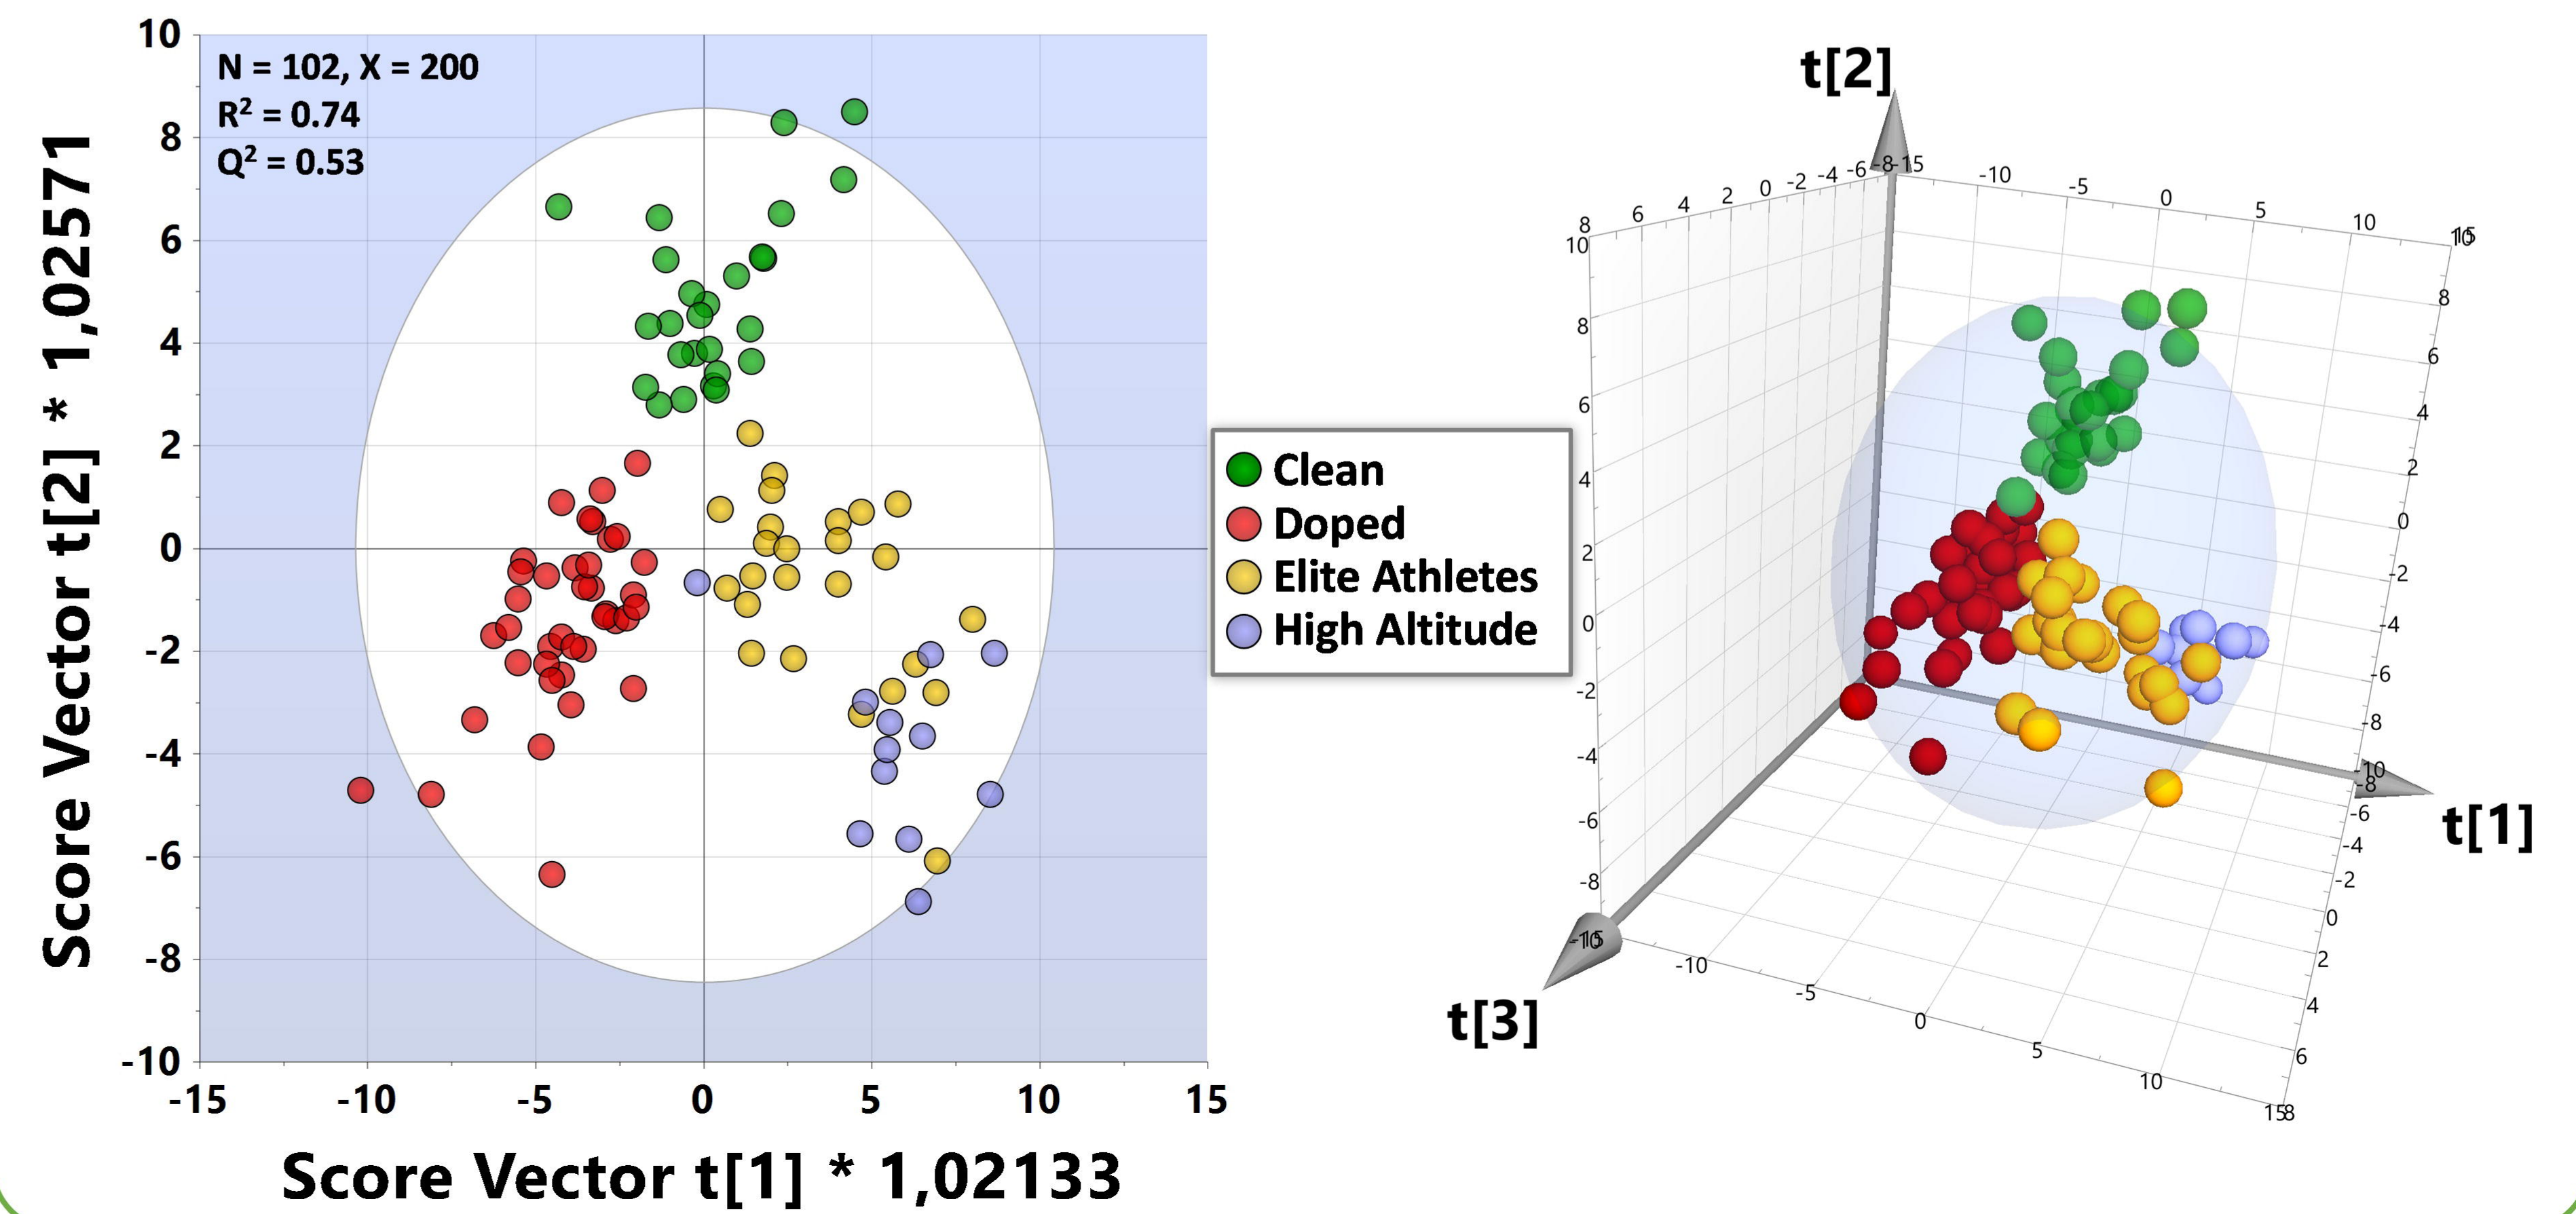

Source: https://medrxiv.org/content/medrxiv/early/2020/07/06/2020.07.04.20146217.full.pdf
